# Supplementary material for: Hydroboration of vinylsilanes providing diversity-oriented hydrophobic building blocks for biofunctional molecules
Source: Royal Society of Chemistry journal article supplement (doi:10.1039/d4ob00632a), 2024-01-01
Supplement: d4ob00632a1.pdf [file d4ob00632a1.pdf]

Supporting Information

**Hydroboration of vinylsilanes providing diversity-oriented hydrophobic building blocks for biofunctional molecules**

Nao Namba, Shinya Fujii

*Institute of Biomaterials and Bioengineering, Tokyo Medical and Dental University,*

*2-3-10 Kanda-Surugadai, Chiyoda-ku, Tokyo 101-0062, Japan*

***Table of Contents***

|                                                                     |    |
|---------------------------------------------------------------------|----|
| 1. Supplementary Figures                                            |    |
| Scheme S1                                                           | 2  |
| Table S1                                                            | 3  |
| 2. Experimental Procedure of Synthesis                              |    |
| 2.1. General remarks                                                | 4  |
| 2.2. Synthesis of vinylsilanes <b>1b</b> , <b>1d</b> , <b>1e-m</b>  | 4  |
| 2.3. Hydroboration of vinylsilanes                                  | 8  |
| 2.4. Synthesis of silylethoxy derivatives <b>4a-e</b> , <b>5a-e</b> | 12 |
| 2.5. References                                                     | 15 |
| 3. NMR spectra                                                      | 16 |

## 1. Supplementary Scheme

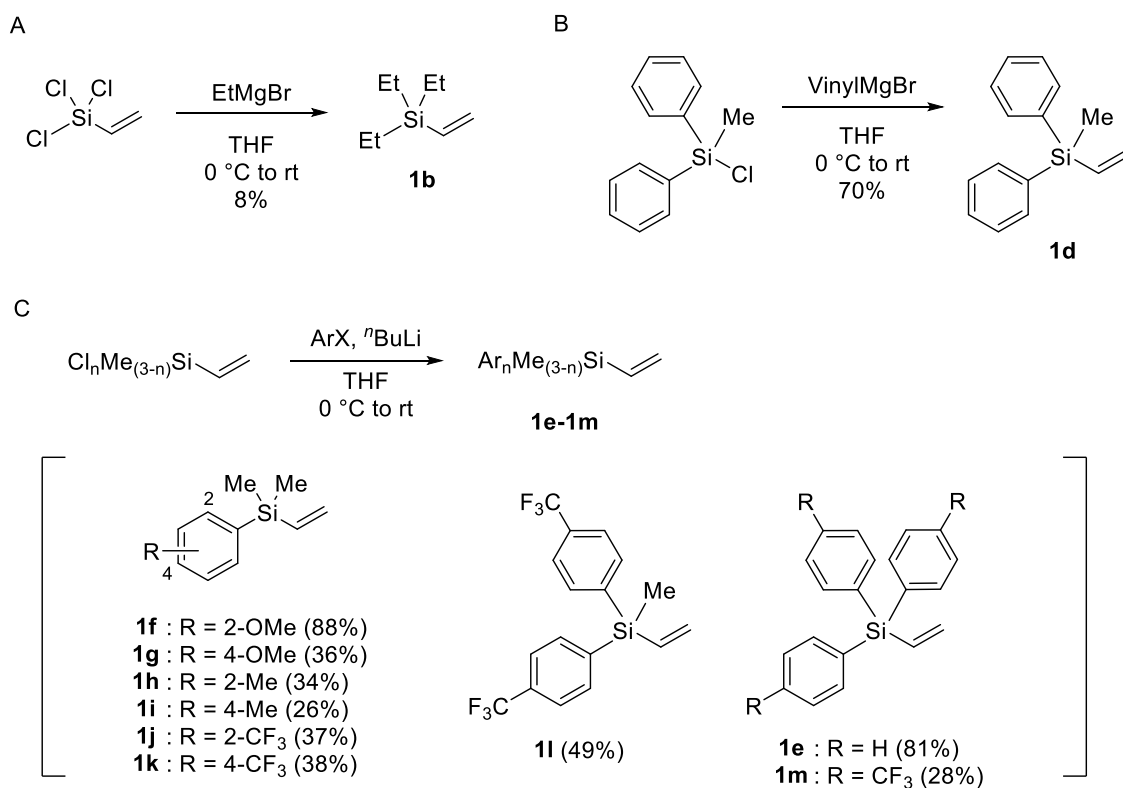

**Scheme. S1.** Synthesis of vinylsilane substrates **1b,1d-1m**. A) Synthesis of triethyl(vinyl)silane **1b** using Ethylmagnesium bromide. B) Synthesis of Methyldiphenyl(vinyl)silane **1d** using vinylmagnesium bromide. C) Synthesis of arylvinylsilane **1e-1m** via lithiation of aryl halide.

**Table S2.** Calculation of transit state energy of **1a, c-e** using B3LYP/6-31G\* basis.

|                                                                                                  |                        | M-addition  | AM-addition |
|--------------------------------------------------------------------------------------------------|------------------------|-------------|-------------|
| 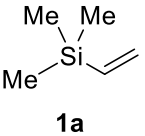<br><b>1a</b>   | E [au]                 | -513.901049 | -513.902327 |
|                                                                                                  | H <sup>0</sup> [au]    | -513.712465 | -513.713090 |
|                                                                                                  | S <sup>0</sup> [J/mol] | 433.14      | 426.80      |
|                                                                                                  | G <sup>0</sup> [au]    | -513.761652 | -513.761556 |
| <br><b>1c</b>   | E [au]                 | -705.637937 | -705.636334 |
|                                                                                                  | H <sup>0</sup> [au]    | -705.395197 | -705.393818 |
|                                                                                                  | S <sup>0</sup> [J/mol] | 506.49      | 514.95      |
|                                                                                                  | G <sup>0</sup> [au]    | -705.452713 | -705.452296 |
| <br><b>1d</b>   | E [au]                 | -897.373320 | -897.371199 |
|                                                                                                  | H <sup>0</sup> [au]    | -897.076345 | -897.074217 |
|                                                                                                  | S <sup>0</sup> [J/mol] | 582.59      | 587.88      |
|                                                                                                  | G <sup>0</sup> [au]    | -897.142503 | -897.140976 |
| <br><b>1e</b> | E [au]                 | -1077.34866 | -1077.34411 |
|                                                                                                  | H <sup>0</sup> [au]    | -1076.95618 | -1076.95224 |
|                                                                                                  | S <sup>0</sup> [J/mol] | 599.46      | 602.50      |
|                                                                                                  | G <sup>0</sup> [au]    | -1077.02425 | -1077.02065 |

## 2. Experimental Procedure of Synthesis

### 2.1. General remarks

All reagents were purchased from TCI Chemicals, Fujifilm Wako Pure Chemical Industries, or Kanto Kagaku Co. Inc., and used without further purification: Thin-layer chromatography (TLC) was performed using silica gel coated with a fluorescent indicator F254 (Merck, #1.05715.0001). Silica gel column chromatography was performed using neutral silica gel (60 Å, 40–50 µm) purchased from Kanto Kagaku Co. Inc. NMR spectra were recorded on Bruker Avance 400 (<sup>1</sup>H: 400 MHz and <sup>13</sup>C: 101 MHz), Bruker Avance 500 (<sup>1</sup>H: 500 MHz and <sup>13</sup>C: 126 MHz), and JEOL JNM-GX500 (<sup>1</sup>H: 500 MHz, <sup>13</sup>C: 126 MHz) spectrometers. Chemical shift values for protons are referenced to the signal of the residual signal chloroform-d (δ 7.26) or acetone-d<sub>6</sub> (δ 2.05), and chemical shift values for carbons are referenced to the carbon resonance of chloroform-d (δ 77.16) or acetone-d<sub>6</sub> (δ 29.84). High-resolution mass (HRMS) spectra were taken on a Bruker Daltonics micrOTOF-2 using the electron spray ionization time-of-flight (ESI-TOF) method.

Due to their very low polarity, measurement of mass spectrometry was not possible for several compounds (**1h**, **1j**, **1l**, **1m**).

### 2.2. Synthesis of vinylsilanes **1b**, **1d**, **1e-m**

#### 2.2.1. Preparation of triethyl(vinyl)silane (**1b**)

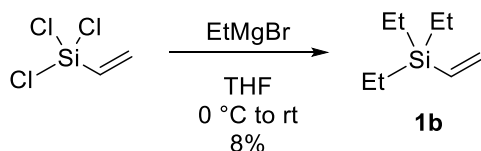

To a mixture of trichlorovinylsilane (0.63 mL, 5.0 mmol) and dry THF (15 mL) was added ethylmagnesium bromide (1.0 M THF solution, 15 mL, 15 mmol) dropwise under Ar atmosphere at 0 °C. The mixture was stirred at rt for 4 h. The reaction mixture was quenched with sat. NH<sub>4</sub>Cl, and the whole was extracted with diethyl ether. The extract was successively washed with water and brine, and then dried over MgSO<sub>4</sub>. The solvent was evaporated, and the residue was purified by means of silica gel column chromatography (Hexane) to give **1b** (57 mg, 8% yield) as colorless oil. The NMR spectra was identical to the reported data.<sup>1</sup>

### 2.2.2. Preparation of methyldiphenyl(vinyl)silane (**1d**)

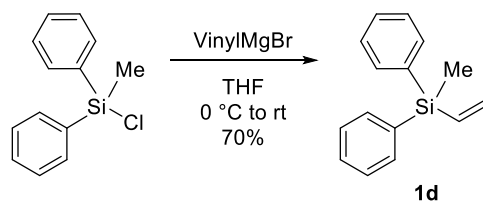

To a mixture of diphenylmethylchlorovinyl silane (1.1 mL, 5.0 mmol) and dry THF (15 mL) was added vinylmagnesium bromide (1.0 M THF solution, 10 mL, 10 mmol) dropwise under Ar atmosphere at 0 °C. The mixture was stirred at reflux condition for 5 h. The reaction mixture was quenched with sat. NH<sub>4</sub>Cl, and the whole was extracted with ethyl acetate three times. The extract was successively washed with water and brine, and then dried over Na<sub>2</sub>SO<sub>4</sub>. The solvent was evaporated, and the residue was purified by means of silica gel column chromatography (Hex-EtOAc, EA=0-5% gradient) to give **1d** (789 mg, 70% yield) as colorless oil. The NMR spectra was identical to the reported data.<sup>2</sup>

### 2.2.3. Synthesis of vinylsilanes via lithiation of aryl halides

#### 2.2.3.1. General Procedure A

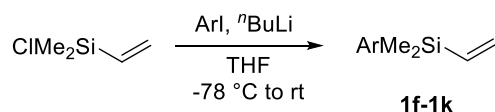

To a mixture of aryl iodide (1.00 mmol) and dry THF (5.0 mL) was added *n*-BuLi in *n*-Hexane (1.6 M hexane solution, 0.75 mL, 1.20 mmol) dropwise under Ar atmosphere at -78 °C. The mixture was stirred at -78 °C for 1 h. dimethylchlorovinylsilane (0.28 mL, 2.0 mmol) was added and stirring at rt for 2 h. The reaction mixture was quenched with saturated NH<sub>4</sub>Cl.aq, and the whole was extracted with EtOAc three times. The extract was successively washed with water and brine, and then dried over Na<sub>2</sub>SO<sub>4</sub>. The solvent was evaporated, and the residue was purified by means of silica gel column chromatography (Hex-EtOAc, EA=0-16% gradient) to give the target vinyl product.

#### 2.2.3.2. (2-Methoxyphenyl)dimethyl(vinyl)silane (**1f**)

Following the general procedure A, **1f** was obtained as colorless oil in 88% yield as colorless oil. The NMR spectra was identical to the reported data.<sup>3</sup>

#### 2.2.3.3. (4-Methoxyphenyl)dimethyl(vinyl)silane (**1g**)

Following the general procedure A, **1g** was obtained as colorless oil in 36% yield as colorless oil. The NMR spectra was identical to the reported data.<sup>4</sup>

#### 2.2.3.4. Dimethyl(*o*-tolyl)(vinyl)silane (**1h**)

Following the general procedure A, **1h** was obtained as colorless oil in 34% yield as colorless oil. <sup>1</sup>H-NMR (400 MHz, CDCl<sub>3</sub>) δ 7.48 (d, *J* = 7.2 Hz, 1H), 7.29 (t, *J* = 7.2 Hz, 1H), 7.19-7.15 (m, 2H), 6.35 (dd, *J* = 20.4 Hz, 14.4 Hz, 1H), 6.04 (dd, *J* = 14.4 Hz, 3.6 Hz, 1H), 5.75 (dd, *J* = 20.4 Hz, 3.6 Hz, 1H), 2.44 (s, 3H), 0.40 (d, 6H, *J* = 0.8 Hz), <sup>13</sup>C-NMR (126 MHz, CDCl<sub>3</sub>) δ 144.0, 138.8, 136.6, 135.0, 132.5, 129.9, 129.5, 125.1, 23.2, -1.9.

#### 2.2.3.5. Dimethyl(*p*-tolyl)(vinyl)silane (**1i**)

Following the general procedure A, **1i** was obtained as colorless oil in 26% yield as colorless oil. The NMR spectra was identical to the reported data.<sup>4</sup>

#### 2.2.3.6. Dimethyl(2-(trifluoromethyl)phenyl)(vinyl)silane (**1j**)

Following the general procedure A, **1j** was obtained as colorless oil in 37% yield as colorless oil. <sup>1</sup>H-NMR (500 MHz, CDCl<sub>3</sub>) δ 7.73-7.72 (m, 1H), 7.69-7.68 (m, 1H), 7.51-7.45 (m, 2H), 6.36 (dd, *J* = 20.3, 14.6 Hz, 1H), 6.06 (dd, *J* = 14.3, 3.4 Hz, 1H), 5.76 (dd, *J* = 20.3, 3.7 Hz, 1H), 0.42 (s, 6H), <sup>13</sup>C-NMR (126 MHz, CDCl<sub>3</sub>) δ 138.4, 136.9, 136.7, 135.2 (q, *J* = 31 Hz), 132.7, 130.8, 129.3, 128.4, 125.2 (q, *J* = 4.8 Hz), 125.2 (q, *J* = 272 Hz), -1.5.

#### 2.2.3.7. Dimethyl(4-(trifluoromethyl)phenyl)(vinyl)silane (**1k**)

Following the general procedure A, **1k** was obtained as colorless oil in 38% yield as colorless oil. The NMR spectra was identical to the reported data.<sup>4</sup>

#### 2.2.4. Synthesis of (triphenyl)dimethyl(vinyl)silane (**1e**)

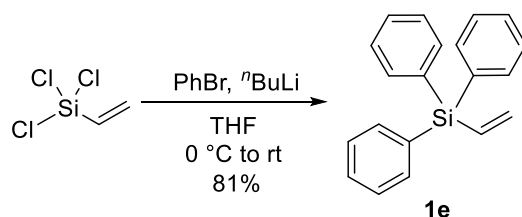

To a mixture of bromobenzene (2.1 mL, 20 mmol) and dry THF (25 mL) was added *n*-BuLi (1.6 M hexane solution, 13 mL, 20 mmol) dropwise under Ar atmosphere at -78 °C. The mixture was stirred at -78 °C for 1 h. trichlorovinylsilane (0.6 mL, 5.0 mmol) was added and stirring at rt for 2 h. The reaction mixture was quenched with sat. NH<sub>4</sub>Cl.aq, and the whole was extracted three times with EtOAc. The extract was successively washed with brine, and then dried over Na<sub>2</sub>SO<sub>4</sub>. The solvent was evaporated, and the residue was purified by means of silica gel column chromatography (Hex-EtOAc, EA = 4-9% gradient) to give **1e** as white solid (1.2 g, 81% isolated yield). The NMR spectra was identical to the reported data.<sup>5</sup>

### 2.2.5. Synthesis of methylbis(4-(trifluoromethyl)phenyl)(vinyl)silane (**1l**)

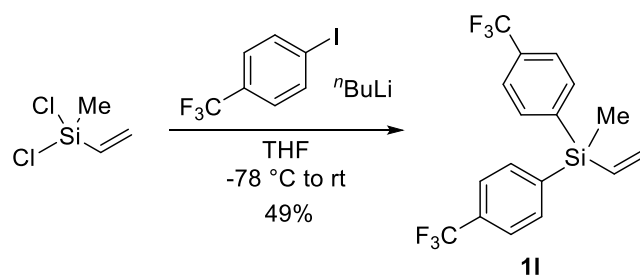

To a mixture of 1-iodo-4-(trifluoromethyl)benzene (0.44 mL, 3.0 mmol) and dry THF (15 mL) was added *n*-BuLi (2.6 M hexane solution, 1.4 mL, 3.6 mmol) dropwise under Ar atmosphere at -78 °C. The mixture was stirred at -78 °C for 1 h. dichloromethylvinylsilane (0.2 mL, 1.8 mmol) was added and stirring at rt for 12 h. The reaction mixture was quenched with water, and the whole was extracted three times with EtOAc. The extract was successively washed with brine, and then dried over Na<sub>2</sub>SO<sub>4</sub>. The solvent was evaporated, and the residue was purified by means of silica gel column chromatography (Hex-EtOAc, EA = 4%) to give **1l** as colorless oil (528 mg, 49% isolated yield). <sup>1</sup>H-NMR (500 MHz, CDCl<sub>3</sub>) δ 7.62 (s, 8H), 6.45 (dd, *J* = 20.0, 14.9 Hz, 1H), 6.27 (dd, *J* = 14.9, 3.4 Hz, 1H), 5.82 (dd, *J* = 20.0, 3.4 Hz, 1H), 0.68 (s, 3H), <sup>13</sup>C-NMR (126 MHz, CDCl<sub>3</sub>) δ 140.5, 136.7, 135.2, 134.0, 131.8 (q, *J* = 33 Hz), 124.6 (q, *J* = 12 Hz), 126.2 (q, *J* = 271 Hz), -4.3.

### 2.2.6. Synthesis of tris(4-(trifluoromethyl)phenyl)(vinyl)silane (**1m**)

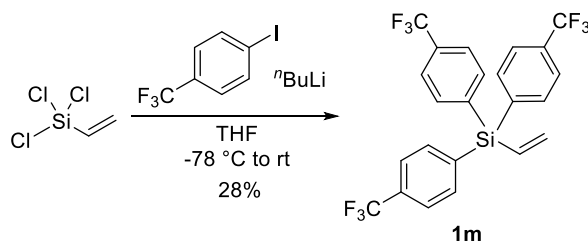

To a mixture of 4-trifluoromethyl iodobenzene (0.74 mL, 5.0 mmol) and dry THF (25 mL) was added *n*-BuLi (1.6 M hexane solution, 3.8 mL, 6.0 mmol) dropwise under Ar atmosphere at -78 °C. The mixture was stirred at -78 °C for 1 h. trichlorovinylsilane (1.3 mL, 1.7 mmol) was added and stirring at rt for 12 h. The reaction mixture was quenched with sat. NH<sub>4</sub>Cl, and the whole was extracted with EtOAc three times. The extract was successively washed with brine, and then dried over Na<sub>2</sub>SO<sub>4</sub>. The solvent was evaporated, and the residue was purified by means of silica gel column chromatography (Hex-EtOAc, EA = 9%) to give the mixture contained **1m** as white needle-like crystal (273 mg, 28% NMR yield). The mixture was further purified by recrystallization (EtOH). mp 88.9-92.5 °C; <sup>1</sup>H-NMR (400 MHz, CDCl<sub>3</sub>) δ 7.65 (d, *J* = 8.4 Hz, 6H), 7.61 (d, *J* = 8.0 Hz, 6H), 6.67 (dd, *J* = 20.4 Hz, 14.8 Hz, 1H), 6.44 (dd, *J* = 14.8 Hz, 3.2 Hz, 1H), 5.84 (dd, *J* = 20.4 Hz, 3.2 Hz, 1H), <sup>13</sup>C-NMR (126 MHz, CDCl<sub>3</sub>) δ 139.3, 137.5, 136.3, 132.8, 132.4 (q, *J* = 32 Hz), 125.0, 124.1 (q, *J* = 272 Hz).

### 2.3. General procedures of hydroboration of vinylsilanes

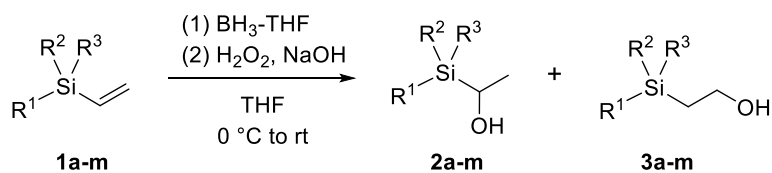

$\text{BH}_3$  (0.9 M THF solution, 2.0 eq.) was added to a mixture of **1** (1.0 eq) and THF (0.2 M) under 0 °C and stirred for 10 min at the same temperature, then stirred at rt for 1 h.  $\text{NaOH}$ .aq (2 mol/L ca. 10 mL),  $\text{H}_2\text{O}_2$ .aq (30%, ca.10 mL) was dropped slowly under 0 °C and stirred for 10 min at the same temperature, then stirred at rt for 1 h. The reaction mixture was quenched by sat.  $\text{NaCl}$ . aq.

*Extraction method B:* The resulted mixture was extracted with diethylether for three times. The organic layer was successively washed with brine, and then dried over  $\text{MgSO}_4$ . The solvent was evaporated to obtain the crude product. The crude product was purified by means of silica gel column chromatography (Hex-EtOAc, EA=14%) to give **2** and **3** separately.

*Extraction method C:* The resulted mixture was extracted with ethyl acetate for three times. The extract was successively washed with brine, and then dried over  $\text{Na}_2\text{SO}_4$ . The solvent was evaporated to obtain the crude product. The crude product was purified by means of silica gel column chromatography (Hex-EtOAc, EA=14%) to give **2** and **3** separately.

1-Silylethanol **2a-m** were generally less polar ( $R_f = \text{ca. } 0.4$  in the condition of Hex-EtOAc, EA=14%) than the corresponding 2-silylethanol **3a-m** ( $R_f = \text{ca. } 0.2$  in the condition of Hex-EtOAc, EA=14%), and therefore these isomers can be easily separated by column chromatography.

#### 2.3.1. 1-(Trimethylsilyl)ethan-1-ol (**2a**) and 2-(trimethylsilyl)ethan-1-ol (**3a**)

By using extraction method C, **2a**, **3a** were obtained in 30% NMR yield (**2a**), 30% NMR yield (**3a**), respectively. The NMR spectra was identical to the reported data.<sup>6</sup>

#### 2.3.2. 1-(Triethylsilyl)ethan-1-ol (**2b**) and 2-(triethylsilyl)ethan-1-ol (**3b**)

By using extraction method C, **2b**, **3b** were obtained in 18% NMR yield (**2b**), 15% NMR yield (**3b**), respectively.

1-(Triethylsilyl)ethan-1-ol (**2b**): colorless oil;  $^1\text{H-NMR}$  (500 MHz,  $\text{CDCl}_3$ )  $\delta$  3.64 (q,  $J = 7.6$  Hz, 1H), 1.31 (d,  $J = 8.0$  Hz, 3H), 0.99 (t,  $J = 8.0$  Hz, 9H), 0.60 (qd,  $J = 7.9, 2.7$  Hz, 6H);  $^{13}\text{C-NMR}$  (126 MHz,  $\text{CDCl}_3$ )  $\delta$  60.3, 20.4, 7.6, 1.6; HRMS(ESI): Calculated for  $\text{C}_8\text{H}_{20}\text{KOSi}$  [ $\text{M}+\text{K}$ ]<sup>+</sup> 199.0915, found 199.0913.

2-(Triethylsilyl)ethan-1-ol (**3b**): colorless oil;  $^1\text{H-NMR}$  (500 MHz,  $\text{CDCl}_3$ )  $\delta$  3.74-3.71 (m, 2H), 1.00-0.97 (m, 2H), 0.93 (t,  $J = 8.6$  Hz, 9H), 0.52 (q,  $J = 7.8$  Hz, 6H);  $^{13}\text{C-NMR}$  (126 MHz,  $\text{CDCl}_3$ )  $\delta$  60.2, 17.6, 7.5, 3.6; HRMS(ESI): Calculated for  $\text{C}_{16}\text{H}_{40}\text{NaO}_2\text{Si}_2$  [ $2\text{M}+\text{Na}$ ]<sup>+</sup> 343.2459, found 343.2460.

#### 2.3.3. 1-(Dimethyl(phenyl)silyl)ethan-1-ol (**2c**) and 2-(dimethyl(phenyl)silyl)ethan-1-ol (**3c**)



By using extraction method D, **2c**, **3c** were obtained in 65% NMR yield (**2c**), 33% NMR yield (**3c**), respectively. The NMR spectra was identical to the reported data.<sup>7</sup>

#### 2.3.4. 1-(Methyldiphenylsilyl)ethan-1-ol (**2d**) and 2-(methyldiphenylsilyl)ethan-1-ol (**3d**)

By using extraction method D, **2d**, **3d** were obtained in 53% NMR yield (**2d**), 27% NMR yield (**3d**), respectively. The NMR spectra of **3d** was identical to the reported data.<sup>8</sup>

1-(Methyldiphenylsilyl)ethan-1-ol (**2d**): colorless oil, <sup>1</sup>H-NMR (500 MHz, CDCl<sub>3</sub>) δ 7.64-7.62 (m, 2H), 7.60-7.58 (m, 2H), 7.44-7.36 (m, 6H), 4.08 (qd, *J* = 7.3, 2.9 Hz, 1H), 1.37 (d, *J* = 7.4 Hz, 3H), 1.11 (d, *J* = 3.4 Hz, 1H), 0.60 (s, 3H); <sup>13</sup>C-NMR (126 MHz, CDCl<sub>3</sub>) δ 136.3, 133.0, 130.0, 128.2, 60.4, 20.2; HRMS(ESI): Calculated for C<sub>15</sub>H<sub>18</sub>NaOSi [M+Na]<sup>+</sup> 265.1019, found 265.1012

#### 2.3.5. 1-(Triphenylsilyl)ethan-1-ol (**2e**) nad 2-(triphenylsilyl)ethan-1-ol (**3e**)

By using extraction method D, **2e**, **3e** were obtained in 50% NMR yield (**2e**), 18% NMR yield (**3e**), respectively. The NMR spectra of **3e** was identical to the reported data.<sup>8</sup>

2-(Triphenylsilyl)ethan-1-ol (**2e**) : white solid; mp 99.7-102.5 °C; <sup>1</sup>H-NMR (500 MHz, CDCl<sub>3</sub>) δ 7.65-7.61 (m, 7H), 7.46-7.43 (m, 3H), 7.40-7.37 (m, 7H), 4.39 (qd, *J* = 7.5, 4.7 Hz, 1H), 1.50 (d, *J* = 7.4 Hz, 3H), 1.25 (d, *J* = 5.2 Hz, 1H); <sup>13</sup>C-NMR (126 MHz, CDCl<sub>3</sub>) δ 136.3, 133.0, 130.0, 128.2, 60.4, 20.2; HRMS(ESI): Calculated for C<sub>20</sub>H<sub>20</sub>NaOSi [M+Na]<sup>+</sup> 327.1176, found 327.1168

#### 2.3.6. 1-((2-Methoxyphenyl)dimethylsilyl)ethan-1-ol (**2f**) and 2-((2-methoxyphenyl)dimethylsilyl)ethan-1-ol (**3f**)

By using extraction method D, **2f**, **3f** were obtained in 42% NMR yield (**2f**), 17% NMR yield (**3f**), respectively.

1-((2-Methoxyphenyl)dimethylsilyl)ethan-1-ol (**2f**): colorless oil; <sup>1</sup>H-NMR (500 MHz, acetone-d<sub>6</sub>) δ 7.42 (dd, *J* = 7.4, 1.7 Hz, 1H), 7.35 (td, *J* = 7.7, 1.5 Hz, 1H), 6.95-6.92 (m, 2H), 3.82 (s, 3H), 3.81-3.74 (m, 1H), 3.03 (d, *J* = 5.2 Hz, 1H), 1.18 (d, *J* = 7.4 Hz, 3H), 0.27 (s, 3H), 0.25 (s, 3H); <sup>13</sup>C-NMR (126 MHz, acetone-d<sub>6</sub>) δ 165.2, 136.4, 131.8, 126.0, 121.3, 110.6, 60.1, 55.5, 20.1, -4.7, -5.4; HRMS(ESI): Calculated for C<sub>11</sub>H<sub>19</sub>O<sub>2</sub>Si [M+H]<sup>+</sup> 211.1149, found 211.1154

2-((2-Methoxyphenyl)dimethylsilyl)ethan-1-ol (**3f**): colorless oil; <sup>1</sup>H-NMR (500 MHz, acetone-d<sub>6</sub>) δ 7.36-7.33 (m, 2H), 6.94-6.91 (m, 2H), 3.82 (s, 3H), 3.64-3.60 (m, 2H), 3.37 (t, *J* = 4.9 Hz, 1H), 1.20-1.17 (m, 2H), 0.26 (s, 6H); <sup>13</sup>C-NMR (126 MHz, acetone-d<sub>6</sub>) δ 164.5, 135.0, 131.0, 126.2, 120.5, 109.7, 58.8, 54.6, 20.8, -2.9; HRMS(ESI): Calculated for C<sub>11</sub>H<sub>18</sub>NaO<sub>2</sub>Si [M+Na]<sup>+</sup> 233.0968, found 233.0966

#### 2.3.7. 1-((4-Methoxyphenyl)dimethylsilyl)ethan-1-ol (**2g**) and 2-((4-methoxyphenyl)dimethylsilyl)ethan-1-ol (**3g**)

By using extraction method D, **2g**, **3g** were obtained in 44% NMR yield (**2g**), 23% NMR yield (**3g**), respectively.

1-((4-Mmethoxyphenyl)dimethylsilyl)ethan-1-ol (**2g**): colorless oil; <sup>1</sup>H-NMR (400 MHz, acetone-d<sub>6</sub>) δ 7.51 (d, *J* = 8.4 Hz, 2H), 6.92 (d, *J* = 8.8 Hz, 2H), 3.79 (s, 3H), 3.64-3.57 (m, 1H), 3.16 (d, *J* = 4.8 Hz, 1H), 1.20 (d, *J* = 7.6 Hz,

3H), 0.26 (s, 3H), 0.25 (s, 3H); <sup>13</sup>C-NMR (126 MHz, acetone-d<sub>6</sub>) δ 161.5, 136.4, 128.9, 114.2, 60.4, 55.2, 20.0, -5.1, -5.4; HRMS(ESI): Calculated for C<sub>11</sub>H<sub>18</sub>NaO<sub>2</sub>Si [M+Na]<sup>+</sup> 233.0968, found 233.0967

2-((4-methoxyphenyl)dimethylsilyl)ethan-1-ol (**3g**) The NMR spectra was identical to the reported data.<sup>9</sup>

### 2.3.8. 1-(Dimethyl(*o*-tolyl)silyl)ethan-1-ol (**2h**) and 2-(dimethyl(*o*-tolyl)silyl)ethan-1-ol (**3h**)

By using extraction method D, **2h**, **3h** were obtained in 60% NMR yield (**2h**), 23% NMR yield (**3h**), respectively.

1-(Dimethyl(*o*-tolyl)silyl)ethan-1-ol (**2h**): colorless oil; <sup>1</sup>H-NMR (400 MHz, CDCl<sub>3</sub>) δ 7.52-7.49 (m, 1H), 7.31-7.27 (m, 1H), 7.20-7.16 (m, 2H), 3.86 (q, *J* = 7.6 Hz, 1H), 2.47 (s, 3H), 1.29 (d, *J* = 7.6 Hz, 3H), 0.40 (s, 3H), 0.36 (s, 3H); <sup>13</sup>C-NMR (126 MHz, CDCl<sub>3</sub>) δ 144.0, 135.4, 135.0, 130.1, 129.7, 125.2, 61.1, 23.6, 19.7; HRMS(ESI): Calculated for C<sub>11</sub>H<sub>18</sub>NaOSi [M+Na]<sup>+</sup> 217.1019, found 217.1022

2-(Dimethyl(*o*-tolyl)silyl)ethan-1-ol (**3h**): colorless oil; <sup>1</sup>H-NMR (400 MHz, CDCl<sub>3</sub>) δ 7.46-7.43 (m, 1H), 7.30-7.28 (m, 1H), 7.19-7.15(m, 2H), 3.75-3.71 (m, 2H), 2.46 (s, 3H), 1.30-1.26 (m, 2H), 0.36 (s, 6H); <sup>13</sup>C-NMR (126 MHz, CDCl<sub>3</sub>) δ 143.7, 136.7, 134.6, 130.1, 129.6, 125.2, 60.3, 23.2, 21.5, -1.4; HRMS(ESI): Calculated for C<sub>11</sub>H<sub>18</sub>NaOSi [M+Na]<sup>+</sup> 217.1019, found 217.1016

### 2.3.9. 1-(Dimethyl(*p*-tolyl)silyl)ethan-1-ol (**2i**) and 2-(dimethyl(*p*-tolyl)silyl)ethan-1-ol (**3i**)

By using extraction method D, **2i**, **3i** were obtained in 46% NMR yield (**2i**), 22% NMR yield (**3i**), respectively.

1-(Dimethyl(*p*-tolyl)silyl)ethan-1-ol (**2i**): colorless oil; <sup>1</sup>H-NMR (400 MHz, CDCl<sub>3</sub>) δ 7.46 (d, *J* = 8.0 Hz, 2H), 7.20 (d, *J* = 7.6 Hz, 2H), 3.66 (q, *J* = 7.2 Hz, 1H), 2.36 (s, 3H), 1.28 (d, *J* = 7.6 Hz, 3H), 0.32 (s, 3H), 0.31 (s, 3H); <sup>13</sup>C-NMR (126 MHz, CDCl<sub>3</sub>) δ 139.4, 134.3, 132.8, 128.9, 61.3, 21.6, 19.5, -5.5, -5.9; HRMS(ESI): Calculated for C<sub>11</sub>H<sub>18</sub>NaOSi [M+Na]<sup>+</sup> 217.1019, found 217.1025

2-(Dimethyl(*p*-tolyl)silyl)ethan-1-ol (**3i**): The NMR spectra was identical to the reported data.<sup>10</sup>

### 2.3.10. 1-(Dimethyl(2-(trifluoromethyl)phenyl)silyl)ethan-1-ol (**2j**) and 2-(dimethyl(2-(trifluoromethyl)phenyl)silyl)ethan-1-ol (**3j**)

By using extraction method D, **2j**, **3j** were obtained in 50% NMR yield (**2j**), 24% NMR yield (**3j**), respectively.

1-(Dimethyl(2-(trifluoromethyl)phenyl)silyl)ethan-1-ol (**2j**): colorless oil; <sup>1</sup>H-NMR (400 MHz, CDCl<sub>3</sub>) δ 7.81 (d, *J* = 7.2 Hz, 1H), 7.71 (d, *J* = 7.6 Hz, 1H), 7.55-7.47 (m, 2H), 3.89 (qd, *J* = 7.6 Hz, 0.8Hz, 1H), 1.27 (d, *J* = 7.6 Hz, 3H), 0.42 (d, *J* = 1.2 Hz, 3H), 0.38 (d, *J* = 1.2Hz, 3H); <sup>13</sup>C-NMR (126 MHz, CDCl<sub>3</sub>) δ 136.8, 135.2 (q, *J* = 30 Hz), 130.9, 129.5, 126.3 (q, *J* = 5.9 Hz), 125.0 (q, *J* = 274 Hz), 61.0, 19.8, -4.0, -4.2; HRMS(ESI): Calculated for C<sub>11</sub>H<sub>15</sub>ClF<sub>3</sub>OSi [M+Cl]<sup>-</sup> 283.0538, found 283.0532

2-(Dmethyl(2-(trifluoromethyl)phenyl)silyl)ethan-1-ol (**3j**): colorless oil; <sup>1</sup>H-NMR (400 MHz, CDCl<sub>3</sub>) δ 7.70 (d, *J* = 7.6 Hz, 2H), 7.54-7.46 (m, 2H), 3.72-3.68 (m, 2H), 1.30-1.26 (m, 2H), 0.39 (d, *J* = 1.2 Hz, 6H); <sup>13</sup>C-NMR (126 MHz, CDCl<sub>3</sub>) δ 136.7, 136.2, 135.0 (q, *J* = 31 Hz), 130.9, 129.4, 126.3 (q, *J* = 4.8 Hz), 125.1 (q, *J* = 274 Hz), 60.1, 21.8, -0.9; HRMS(ESI): Calculated for C<sub>11</sub>H<sub>15</sub>F<sub>3</sub>NaOSi [M+Na]<sup>+</sup> 271.0736, found 271.0727

2.3.11. 1-(Dimethyl(4-(trifluoromethyl)phenyl)silyl)ethan-1-ol (**2k**) and

2-(dimethyl(4-(trifluoromethyl)phenyl)silyl)ethan-1-ol (**3k**)

By using extraction method D, **2k**, **3k** were obtained in 52% NMR yield (**2k**), 19% NMR yield (**3k**), respectively.

1-(Dimethyl(4-(trifluoromethyl)phenyl)silyl)ethan-1-ol (**2k**): colorless oil; <sup>1</sup>H-NMR (400 MHz, CDCl<sub>3</sub>) δ 7.69 (d, *J* = 7.6 Hz, 2H), 7.61 (d, *J* = 7.6 Hz, 2H), 3.71 (q, *J* = 7.2 Hz, 1H), 1.29 (d, *J* = 7.6 Hz, 3H), 0.36 (s, 3H), 0.35 (s, 3H); <sup>13</sup>C-NMR (126 MHz, CDCl<sub>3</sub>) δ 141.8, 134.6, 131.4 (q, *J* = 32 Hz), 126.5 (q, *J* = 3.7 Hz), 124.3 (q, *J* = 271 Hz), 123.2, 121.1, 61.0, 19.7, -5.6; HRMS(ESI): Calculated for C<sub>11</sub>H<sub>15</sub>F<sub>3</sub>NaOSi [M+Na]<sup>+</sup> 271.0736, found 271.0739

2-(Dimethyl(4-(trifluoromethyl)phenyl)silyl)ethan-1-ol (**3k**): colorless oil; <sup>1</sup>H NMR (400 MHz, CDCl<sub>3</sub>): δ 7.63 (d, *J* = 8.0 Hz, 2H), 7.60 (d, *J* = 8.4 Hz, 2H), 3.76-3.72 (m, 2H), 1.26-1.19 (m, 2H), 0.33 (s, 3H); <sup>13</sup>C-NMR (126 MHz, CDCl<sub>3</sub>) δ 143.8, 133.9, 131.2 (q, *J* = 31 Hz), 124.5 (q, *J* = 3.5 Hz), 124.3 (q, *J* = 273 Hz), 59.9, 20.9, -2.7; HRMS(ESI): Calculated for C<sub>11</sub>H<sub>15</sub>F<sub>3</sub>NaOSi [M+Na]<sup>+</sup> 271.0736, found 271.0737

2.3.12. 1-(Methylbis(4-(trifluoromethyl)phenyl)silyl)ethan-1-ol (**2l**) and

2-(methylbis(4-(trifluoromethyl)phenyl)silyl)ethan-1-ol (**3l**)

By using extraction method D, **2l**, **3l** were obtained in 55% NMR yield (**2l**), 18% NMR yield (**3l**), respectively.

1-(Methylbis(4-(trifluoromethyl)phenyl)silyl)ethan-1-ol (**2l**): colorless oil; <sup>1</sup>H-NMR (400 MHz, CDCl<sub>3</sub>) δ 7.75 (d, *J* = 7.6 Hz, 2H), 7.70 (d, *J* = 7.6 Hz, 2H), 7.64-7.62 (m, 4H), 4.12 (q, *J* = 7.6 Hz, 1H), 1.37 (d, *J* = 7.6 Hz, 3H), 0.65 (s, 3H); <sup>13</sup>C-NMR (126 MHz, CDCl<sub>3</sub>) δ 139.4, 138.9, 135.6, 135.3, 132.5 (q, *J* = 32 Hz), 131.9 (q, *J* = 33 Hz), 124.8, 124.2 (q, *J* = 273 Hz), 60.2, 20.1, -6.9; HRMS(ESI): Calculated for C<sub>17</sub>H<sub>16</sub>F<sub>6</sub>NaOSi [M+Na]<sup>+</sup> 401.0767, found 401.0782

2-(Methylbis(4-(trifluoromethyl)phenyl)silyl)ethan-1-ol (**3l**): brown oil; <sup>1</sup>H-NMR (500 MHz, CDCl<sub>3</sub>) δ 7.62 (s, 8H), 3.82-3.79 (m, 2H), 1.57-1.54 (m, 2H), 0.66 (s, 3H); <sup>13</sup>C-NMR (126 MHz, CDCl<sub>3</sub>) δ 140.9, 134.8, 131.8 (q, *J* = 33 Hz), 124.8 (q, *J* = 3.6 Hz), 124.2 (q, *J* = 273 Hz), 59.5, 19.0, -4.0; HRMS(ESI): Calculated for C<sub>17</sub>H<sub>16</sub>F<sub>6</sub>NaOSi [M+Na]<sup>+</sup> 401.0767, found 401.0774

2.3.13. 1-(Tris(4-(trifluoromethyl)phenyl)silyl)ethan-1-ol (**2m**) and

2-(tris(4-(trifluoromethyl)phenyl)silyl)ethan-1-ol (**3m**)

By using extraction method D, **2m**, **3m** were obtained in 43% NMR yield (**2m**), 16% NMR yield (**3m**), respectively.

1-(Tris(4-(trifluoromethyl)phenyl)silyl)ethan-1-ol (**2m**): white solid; mp 124.8-127.2 °C; <sup>1</sup>H-NMR (400 MHz, CDCl<sub>3</sub>) δ 7.73 (d, *J* = 8.0 Hz, 6H), 7.66 (d, *J* = 8.0 Hz, 1H), 4.47 (q, *J* = 7.6 Hz, 1H), 1.51 (d, *J* = 7.6 Hz, 3H); <sup>13</sup>C-NMR (126 MHz, CDCl<sub>3</sub>) δ 136.6, 136.5, 132.5 (q, *J* = 33 Hz), 125.1 (q, *J* = 20 Hz), 124.1 (q, *J* = 273 Hz), 59.9, 20.6; HRMS(ESI): Calculated for C<sub>23</sub>H<sub>17</sub>F<sub>9</sub>NaOSi [M+Na]<sup>+</sup> 531.0797, found 531.0797

2-(Tris(4-(trifluoromethyl)phenyl)silyl)ethan-1-ol (**3m**): white solid; mp 124.4-125.9 °C; <sup>1</sup>H-NMR (500 MHz, CDCl<sub>3</sub>) δ 7.65 (d, *J* = 8.6 Hz, 6H), 7.63 (d, *J* = 8.0 Hz, 7H), 3.90-3.86 (m, 2H), 1.90-1.87 (m, 2H); <sup>13</sup>C-NMR (126

MHz, CDCl<sub>3</sub>)  $\delta$  138.1, 135.9, 132.7, 132.5, 132.2, 132.0, 127.3, 125.1, 125.0, 125.0, 123.0, 120.8, 59.1, 17.8;  
HRMS(ESI): Calculated for C<sub>23</sub>H<sub>17</sub>F<sub>9</sub>NaOSi [M+Na]<sup>+</sup> 531.0797, found 531.0785

#### 2.4. Synthesis of silylethoxy derivatives **4a-e**, **5a-e**

##### General procedure D

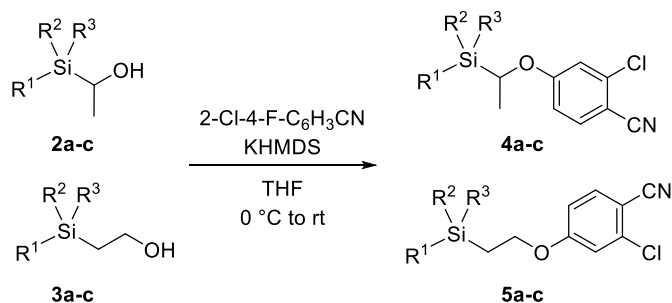

To a mixture of 2-chloro-4-fluorobenzonitrile (0.6 mmol), silylethenol (0.2 mmol), and THF (2 mL) was added KHMDS (0.5 M toluene solution, 0.8 mL, 0.40 mmol) under 0 °C. After stirred for 4 h under rt, the reaction mixture was added 1M KHSO<sub>4</sub>. aq. The whole was extracted three times with ethyl acetate. The extract was successively washed with water and brine, and then dried over Na<sub>2</sub>SO<sub>4</sub>. The solvent was evaporated, and the residue was purified by means of silica gel column chromatography (Hex-EtOAc, EA=5-40% gradient) to give the mixture contained target product and substrate fluorobenzene. This mixture was purified by GPC (3-4 cycle) and get pure silylethoxy product.

##### General procedure E

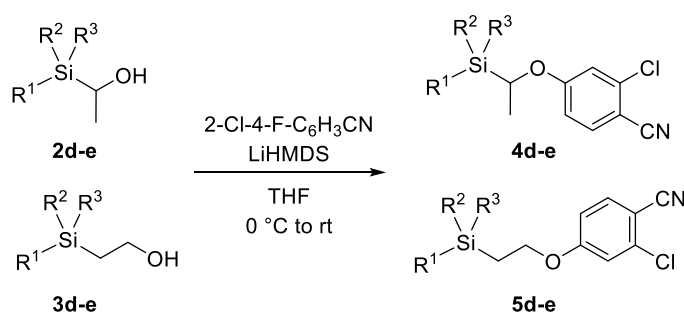

To a mixture of 2-chloro-4-fluorobenzonitrile (117 mg, 0.75 mmol), silylethenol (0.50 mmol), and THF (5 mL) was added LiHMDS (1.3 M THF solution, 0.8 mL, 1.0 mmol) under 0 °C. After stirred for 17 h under rt, the reaction mixture was added 1M KHSO<sub>4</sub>. aq. The whole was extracted three times with ethyl acetate. The extract was successively washed with water and brine, and then dried over Na<sub>2</sub>SO<sub>4</sub>. The solvent was evaporated, and the residue was purified by means of silica gel column chromatography (Hex-EtOAc, EA=5-30% gradient) to give the mixture contained target product and substrate fluorobenzene. This mixture was further purified by GPC (3-4 cycle) and get pure silylethoxy product.

#### 2.4.1. 2-Chloro-4-(1-(trimethylsilyl)ethoxy)benzonitrile (**4a**)

Following the general procedure D, **4a** was obtained as colorless oil in 24% yield. <sup>1</sup>H-NMR (500 MHz, CDCl<sub>3</sub>) δ 7.53 (d, *J* = 8.6 Hz, 1H), 7.00 (d, *J* = 2.9 Hz, 1H), 6.84 (dd, *J* = 9.2, 2.3 Hz, 1H), 4.11 (q, *J* = 7.3 Hz, 1H), 1.33 (d, *J* = 6.9 Hz, 3H), 0.09 (s, 9H); <sup>13</sup>C-NMR (126 MHz, CDCl<sub>3</sub>) δ 163.8, 138.4, 135.1, 116.8, 116.7, 114.5, 104.2, 68.9, 14.9, -3.9; HRMS(ESI) : Calculated for C<sub>12</sub>H<sub>17</sub>ClNOSi [M+H]<sup>+</sup> 254.0762, found 254.0756

#### 2.4.2. 2-Chloro-4-(2-(trimethylsilyl)ethoxy)benzonitrile (**5a**)

Following the general procedure D, **5a** was obtained as white solid in 36% yield. mp 53.7-54.4 °C; <sup>1</sup>H-NMR (500 MHz, CDCl<sub>3</sub>) δ 7.55 (d, *J* = 8.6 Hz, 1H), 6.97 (d, *J* = 2.6 Hz, 1H), 6.83 (dd, *J* = 8.6, 2.3 Hz, 1H), 4.13-4.09 (m, 2H), 1.16-1.13 (m, 2H), 0.09 (s, 9H); <sup>13</sup>C-NMR (126 MHz, CDCl<sub>3</sub>) δ 163.6, 138.4, 135.2, 116.8, 116.6, 114.4, 104.2, 67.5, 15.4, 7.5, 1.7; HRMS(ESI) : Calculated for C<sub>12</sub>H<sub>16</sub>ClNNaOSi [M+Na]<sup>+</sup> 276.0582, found 276.0577

#### 2.4.3. 2-Chloro-4-(1-(triethylsilyl)ethoxy)benzonitrile (**4b**)

Following the general procedure D, **4b** was obtained as colorless oil in 31% yield. <sup>1</sup>H-NMR (500 MHz, CDCl<sub>3</sub>) δ 7.54 (d, *J* = 8.6 Hz, 1H), 7.00 (d, *J* = 2.3 Hz, 1H), 6.85 (dd, *J* = 8.9, 2.6 Hz, 1H), 4.26 (q, *J* = 7.3 Hz, 1H), 1.37 (d, *J* = 7.4 Hz, 3H), 0.99 (t, *J* = 8.0 Hz, 9H), 0.72-0.62 (m, 6H); <sup>13</sup>C-NMR (126 MHz, CDCl<sub>3</sub>) δ 163.6, 138.4, 135.2, 116.8, 116.6, 114.4, 104.2, 67.5, 15.4, 7.5, 1.7; HRMS(ESI) : Calculated for C<sub>15</sub>H<sub>22</sub>ClNNaOSi [M+Na]<sup>+</sup> 318.1051, found 318.1044

#### 2.3.4. 2-Chloro-4-(2-(triethylsilyl)ethoxy)benzonitrile (**5b**)

Following the general procedure D, **5b** was obtained as colorless oil in 17% yield. <sup>1</sup>H-NMR (500 MHz, CDCl<sub>3</sub>) δ 7.55 (d, *J* = 9.2 Hz, 1H), 6.96 (d, *J* = 2.3 Hz, 1H), 6.82 (dd, *J* = 8.6, 2.3 Hz, 1H), 4.12-4.08 (m, 2H), 1.18-1.15 (m, 2H), 0.97 (t, *J* = 7.7 Hz, 9H), 0.59 (q, *J* = 8.0 Hz, 6H); <sup>13</sup>C-NMR (126 MHz, CDCl<sub>3</sub>) δ 162.9, 138.4, 135.1, 116.7, 116.1, 114.1, 104.8, 66.8, 12.8, 7.5, 3.6; HRMS (ESI) : Calculated for C<sub>15</sub>H<sub>22</sub>ClNNaOSi [M+Na]<sup>+</sup> 318.1051, found 318.1048

#### 2.3.5. 2-Chloro-4-(1-(dimethyl(phenyl)silyl)ethoxy)benzonitrile (**4c**)

Following the general procedure D, **4c** was obtained as colorless oil in 22% yield. <sup>1</sup>H-NMR (500 MHz, CDCl<sub>3</sub>) δ 7.55-7.53 (m, 2H), 7.51 (d, *J* = 8.6 Hz, 1H), 7.42-7.35 (m, 3H), 6.98 (d, *J* = 2.3 Hz, 1H), 6.83 (dd, *J* = 8.9, 2.6 Hz, 1H), 4.30 (q, *J* = 7.3 Hz, 1H), 1.33 (d, *J* = 6.9 Hz, 3H), 0.40 (s, 3H), 0.39 (s, 3H); <sup>13</sup>C-NMR (126 MHz, CDCl<sub>3</sub>) δ 163.5, 138.3, 135.5, 135.1, 134.2, 129.9, 128.1, 116.8, 114.5, 104.4, 68.7, 15.2, -5.5, -5.6; HRMS(ESI) : Calculated for C<sub>17</sub>H<sub>18</sub>ClNNaOSi [M+Na]<sup>+</sup> 338.0738, found 338.0734

#### 2.3.6. 2-Chloro-4-(2-(dimethyl(phenyl)silyl)ethoxy)benzonitrile (**5c**)

Following the general procedure D, **5c** was obtained as white solid in 20% yield. mp 40.2-41.1 °C; <sup>1</sup>H-NMR (500

MHz, CDCl<sub>3</sub>) δ 7.53-7.51 (m, 3H), 7.40-7.36 (m, 3H), 6.89 (d, *J* = 2.3 Hz, 1H), 6.75 (dd, *J* = 8.6, 2.3 Hz, 1H), 4.09-4.06 (m, 2H), 1.39-1.36 (m, 2H), 0.37 (s, 6H); <sup>13</sup>C-NMR (126 MHz, CDCl<sub>3</sub>) δ 162.8, 138.4, 137.8, 135.1, 133.6, 129.5, 128.2, 116.6, 116.1, 114.0, 104.8, 66.6, 16.9, -2.6; HRMS(ESI) : Calculated for C<sub>17</sub>H<sub>18</sub>CINNaOSi [M+Na]<sup>+</sup> 338.0738, found 338.0729

### 2.3.7. 2-Chloro-4-(1-(methyldiphenylsilyl)ethoxy)benzotrile (**4d**)

Following the general procedure E, **4d** was obtained as colorless oil in 62% yield. <sup>1</sup>H-NMR (500 MHz, CDCl<sub>3</sub>) δ 7.59-7.55 (m, 4H), 7.52 (d, *J* = 8.6 Hz, 1H), 7.44-7.35 (m, 6H), 7.01 (d, *J* = 2.3 Hz, 1H), 6.86 (dd, *J* = 8.6, 2.3 Hz, 1H), 4.65 (q, *J* = 7.3 Hz, 1H), 1.40 (d, *J* = 7.4 Hz, 3H), 0.68 (s, 3H); <sup>13</sup>C-NMR (126 MHz, CDCl<sub>3</sub>) δ 163.2, 138.4, 135.1, 135.0, 133.8, 133.7, 130.1, 128.3, 128.2, 116.8, 116.7, 114.6, 104.6, 68.0, 15.4, -6.5; HRMS(ESI) : Calculated for C<sub>22</sub>H<sub>20</sub>CINNaOSi [M+Na]<sup>+</sup> 400.0895, found 400.0892

### 2.3.8. 2-Chloro-4-(2-(methyldiphenylsilyl)ethoxy)benzotrile (**5d**)

Following the general procedure E, **5d** was obtained as white solid in 27% yield. mp 54.8-56.1 °C; <sup>1</sup>H-NMR (500 MHz, CDCl<sub>3</sub>) δ 7.54-7.49 (m, 5H), 7.43-7.36 (m, 6H), 6.84 (d, *J* = 2.3 Hz, 1H), 6.70 (dd, *J* = 8.6, 2.3 Hz, 1H), 4.14-4.11 (m, 2H), 1.71-1.68 (m, 2H), 0.65 (s, 3H); <sup>13</sup>C-NMR (126 MHz, CDCl<sub>3</sub>) δ 162.7, 138.3, 135.8, 135.1, 134.5, 129.8, 128.2, 116.6, 116.1, 114.0, 104.9, 66.4, 15.6, -3.7; HRMS(ESI) : Calculated for C<sub>22</sub>H<sub>21</sub>CINOSi [M+H]<sup>+</sup> 378.1075, found 378.1081

### 2.3.9. 2-Chloro-4-(1-(triphenylsilyl)ethoxy)benzotrile (**4e**)

Following the general procedure E, **4e** was obtained as white solid in 48% yield. mp 122.2-123.0 °C; <sup>1</sup>H-NMR (500 MHz, acetone-d<sub>6</sub>) δ 7.76 (d, *J* = 8.6 Hz, 1H), 7.66 (dd, *J* = 8.0, 1.7 Hz, 6H), 7.50-7.47 (m, 3H), 7.43 (t, *J* = 7.4 Hz, 6H), 7.40 (d, *J* = 2.3 Hz, 1H), 7.21 (dd, *J* = 8.6, 2.3 Hz, 1H), 5.44 (q, *J* = 7.3 Hz, 1H), 1.54 (d, *J* = 7.4 Hz, 3H); <sup>13</sup>C-NMR (126 MHz, CDCl<sub>3</sub>) δ 163.1, 138.5, 136.2, 135.2, 132.1, 130.3, 128.3, 116.8, 116.7, 114.6, 104.8, 67.9, 15.7; HRMS(ESI) : Calculated for C<sub>27</sub>H<sub>22</sub>CINNaOSi [M+Na]<sup>+</sup> 462.1051, found 462.1057

### 2.3.10. 2-Chloro-4-(2-(triphenylsilyl)ethoxy)benzotrile (**5e**)

Following the general procedure E, **5e** was obtained as white solid in 14% yield. mp 135.0-136.4 °C; <sup>1</sup>H-NMR (500 MHz, CDCl<sub>3</sub>) δ 7.55-7.53 (m, 6H), 7.48-7.43 (m, 4H), 7.40-7.37 (m, 6H), 6.78 (d, *J* = 2.3 Hz, 1H), 6.64 (dd, *J* = 8.9, 2.6 Hz, 1H), 4.21-4.18 (m, 2H), 2.01-1.98 (m, 2H); <sup>13</sup>C-NMR (126 MHz, CDCl<sub>3</sub>) δ 162.6, 138.3, 135.6, 135.0, 133.8, 130.1, 128.3, 116.6, 116.1, 114.0, 104.8, 66.2, 14.7; HRMS(ESI) : Calculated for C<sub>27</sub>H<sub>23</sub>CINOSi [M+H]<sup>+</sup> 440.1232, found 440.1242

#### References for Supporting Information

1. J. A. Soderquist, I. Rivera and A. Negron, *J. Org. Chem.*, **1989**, *54*, 4051–4055.
2. C.-H. Jun and R. H. Crabtree, *J. Organomet. Chem.*, **1993**, *447*, 177–187.
3. D. Brösamlen and M. Oestreich, *Org. Lett.*, **2023**, *25*, 5319–5323.
4. T. Kratz, P. Steinbach, S. Breitenlechner, G. Storch, C. Bannwarth and T. Bach, *J. Am. Chem. Soc.*, **2022**, *144*, 10133–10138.
5. A. K. Sahoo, T. Oda, Y. Nakao and T. Hiyama, *Adv. Synth. Catal.*, **2004**, *346*, 1715–1727.
6. J. A. Soderquist and S.-J. H. Lee, *Tetrahedron*, **1988**, *44*, 4033–4042.
7. R. Tacke, S. A. Wagner, S. Brakmann, F. Wuttke, U. Eilert, L. Fischer and C. Syldatk, *J. Organomet. Chem.*, **1993**, *458*, 13–17.
8. J. E. Celebuski, C. Chan and R. A. Jones, *J. Org. Chem.*, **1992**, *57*, 5535–5538.
9. M. Fujio, M. Uchida, A. Okada, M. A. Alam, R. Fujiyama, H. U. Siehl and Y. Tsuno, *Bull. Chem. Soc. Jpn.*, **2005**, *78*, 1834–1842.
10. J. Vencl, J. Hetflejš, P. Kučera, J. Čermák and V. Chvalovský, *Collect. Czechoslov. Chem. Commun.*, **1973**, *38*, 1248–1255.

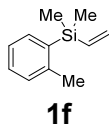

o-Me col 5-7 GPC1

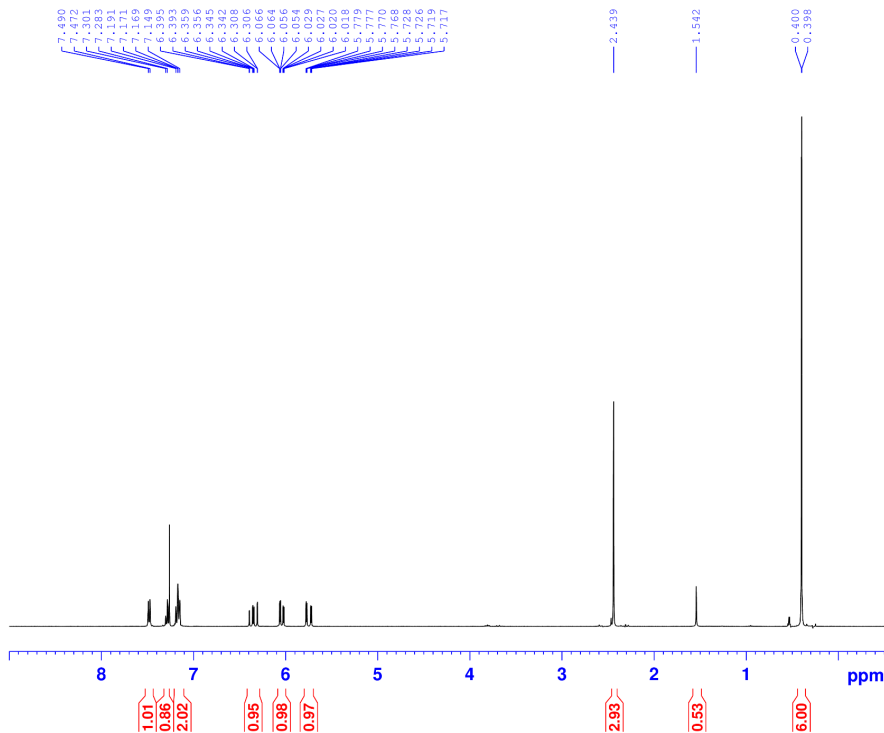

**IBB-nmr Analysis**

```

NAME          NN248-042
EXPNO         3
PROCNO        1
Date_         20220430
Time          20.05
INSTRUM       av400
PROBHD        5 mm PABBO BB-
PULPROG       zg30
TD            65536
SOLVENT       CDCl3
NS            16
DS            2
SWH           8223.685 Hz
FIDRES        0.125483 Hz
AQ            3.9846387 sec
RG            203
DW            60.800 usec
DE            6.50 usec
TE            296.5 K
D1            1.0000000 sec
TD0           1

===== CHANNEL f1 =====
NUC1          1H
P1            14.00 usec
PL1           -1.80 dB
PL1W          14.82738590 W
SFO1          400.1324710 MHz
SI            32768
SF            400.1300096 MHz
WDW           EM
SSB           0
LB            0.30 Hz
GB            0
PC            1.00
  
```

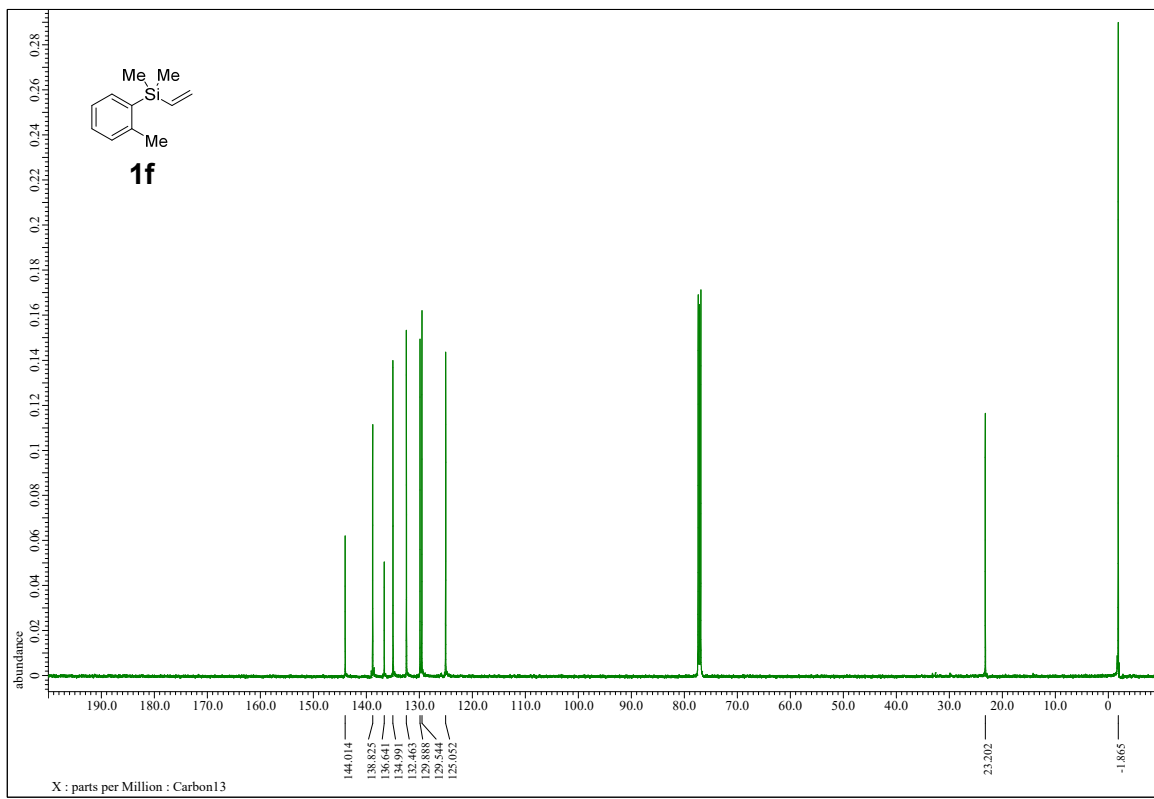


```

Filename      = 042col14-7_gpc1_Carbon-13
Author        = delta
Experiment    = carbon_jmp
Sample_id     = 042col14-7_gpc1
Solvent       = CHLOROFORM-D
Actual_Start_Time = 30-APR-2022 21:53:13
Revision_Time = 20-FEB-2024 13:53:33

Comment       = single pulse decoupled ga
Data Format    = 1D COMPLEX
Dim_Size      = 26214
X_Domain      = Carbon
Dim_Title     = Carbon13
Dim_Units     = [ppm]
Dimensions    = X
Site          = JNM-ECA500
Spectrometer  = DELTA2_NMR

Field_Strength = 11.7473579 [T] (500 [MHz])
X_Acq_Duration = 0.83361792 [s]
X_Tomax        = 13C
X_Freq         = 125.76529768 [MHz]
X_Offset       = 100 [ppm]
X_Points       = 32768
X_Prescans     = 4
X_Resolution   = 1.19959034 [Hz]
X_Sweep        = 39.3081761 [kHz]
X_Sweep_Clipped = 31.44654088 [kHz]
Irr_Domain     = Proton
Irr_Freq       = 500.15991521 [MHz]
Irr_Offset     = 5.0 [ppm]
Clipped        = FALSE
Scans          = 2048
Total_scans    = 2048

Relaxation_Delay = 2 [s]
Recvc_gain      = 50
Temp_Set        = 23.3 [dC]
X_90_Width      = 12.65 [us]
X_Acq_Time      = 0.83361792 [s]
X_Angle         = 90 [deg]
X_Atn           = 7 [dB]
X_Pulse         = 4.2166667 [us]
Irr_Atn_Dec     = 25.254 [dB]
Irr_Atn_Noise  = 25.254 [dB]
Irr_Noise      = WALTZ
Irr_Pwidth      = 92 [us]
Decoupling      = TRUE
Initial_Wait    = 1 [s]
Noe             = TRUE
Noe_Time        = 2 [s]
Repetition_Time = 2.83361792 [s]
  
```



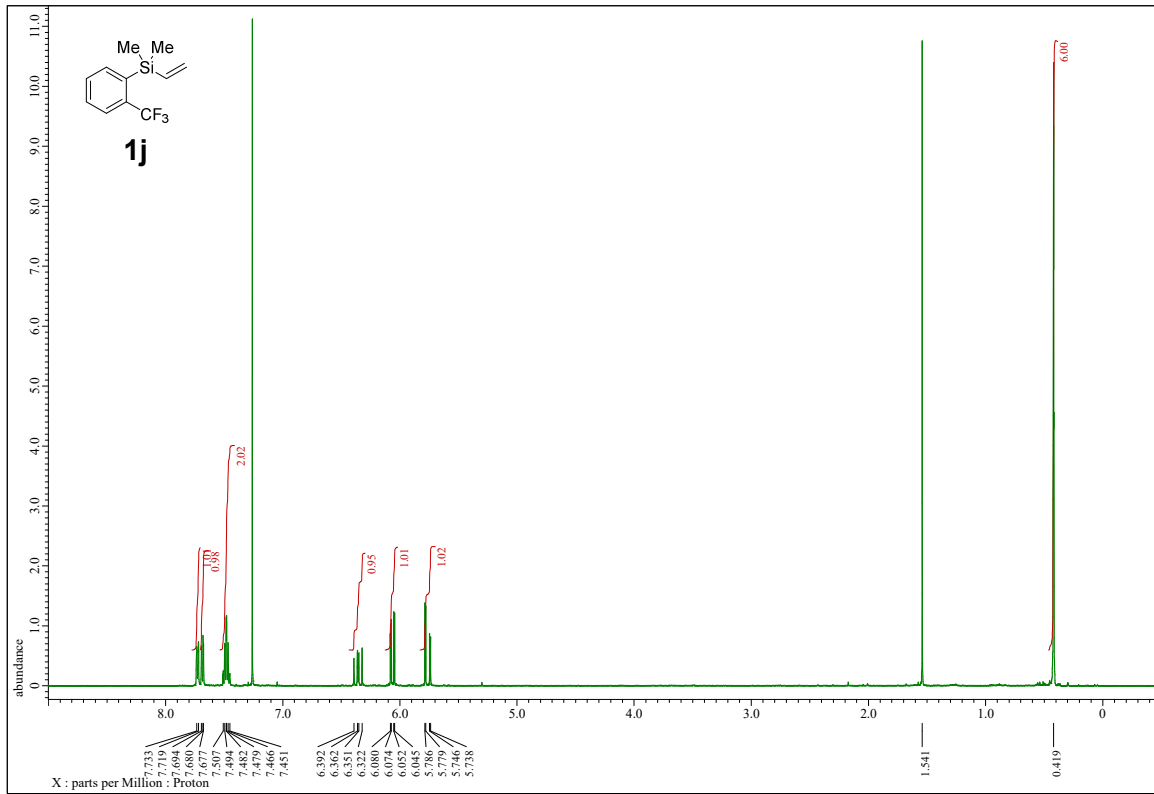

**JEOL**

|                   |                             |
|-------------------|-----------------------------|
| Filename          | = 248-041_cCF3_vinyl_Proton |
| Author            | = delta                     |
| Experiment        | = proton.jxp                |
| Sample_id         | = 248-041_cCF3_vinyl        |
| Solvent           | = CHLOROFORM-D              |
| Actual_Start_Time | = 21-SEP-2024 23:31:24      |
| Revision_Time     | = 21-SEP-2024 15:29:54      |
| Comment           | = single pulse              |
| Data_Format       | = 1D COMPLEX                |
| Dim_Size          | = 13107                     |
| X_Domain          | = Proton                    |
| Dim_Title         | = Proton                    |
| Dim_Units         | = [ppm]                     |
| Dimensions        | = X                         |
| Site              | = JNM-ECA500                |
| Spectrometer      | = DELTA2_NMR                |
| Field_Strength    | = 11.7473579[T] (500[MHz])  |
| X_Acq_Duration    | = 1.74587904[s]             |
| X_Domain          | = 1H                        |
| X_Freq            | = 500.15991521[MHz]         |
| X_Offset          | = 5.0[ppm]                  |
| X_Points          | = 14284                     |
| X_Prescans        | = 1                         |
| X_Resolution      | = 0.57277737[Hz]            |
| X_Sweep           | = 9.38438438[kHz]           |
| X_Sweep_Clipped   | = 7.50750751[kHz]           |
| Irr_Domain        | = Proton                    |
| Irr_Freq          | = 500.15991521[MHz]         |
| Irr_Offset        | = 5.0[ppm]                  |
| Tri_Domain        | = Proton                    |
| Tri_Freq          | = 500.15991521[MHz]         |
| Tri_Offset        | = 5.0[ppm]                  |
| Clipped           | = FALSE                     |
| Scans             | = 8                         |
| Total_Scans       | = 8                         |
| Relaxation_Delay  | = 5[s]                      |
| Recv_gain         | = 58                        |
| Temp_Set          | = 22.7[dc]                  |
| X_90_Width        | = 6.7[us]                   |
| X_Acq_Time        | = 1.74587904[s]             |
| X_Angle           | = 45[deg]                   |
| X_Atn             | = 2.5[db]                   |
| X_Pulse           | = 3.35[us]                  |
| Irr_Mode          | = Off                       |
| Tri_Mode          | = Off                       |
| Daqts_Preset      | = FALSE                     |
| Initial_Wait      | = 1[s]                      |
| Repetition_Time   | = 6.74587904[s]             |

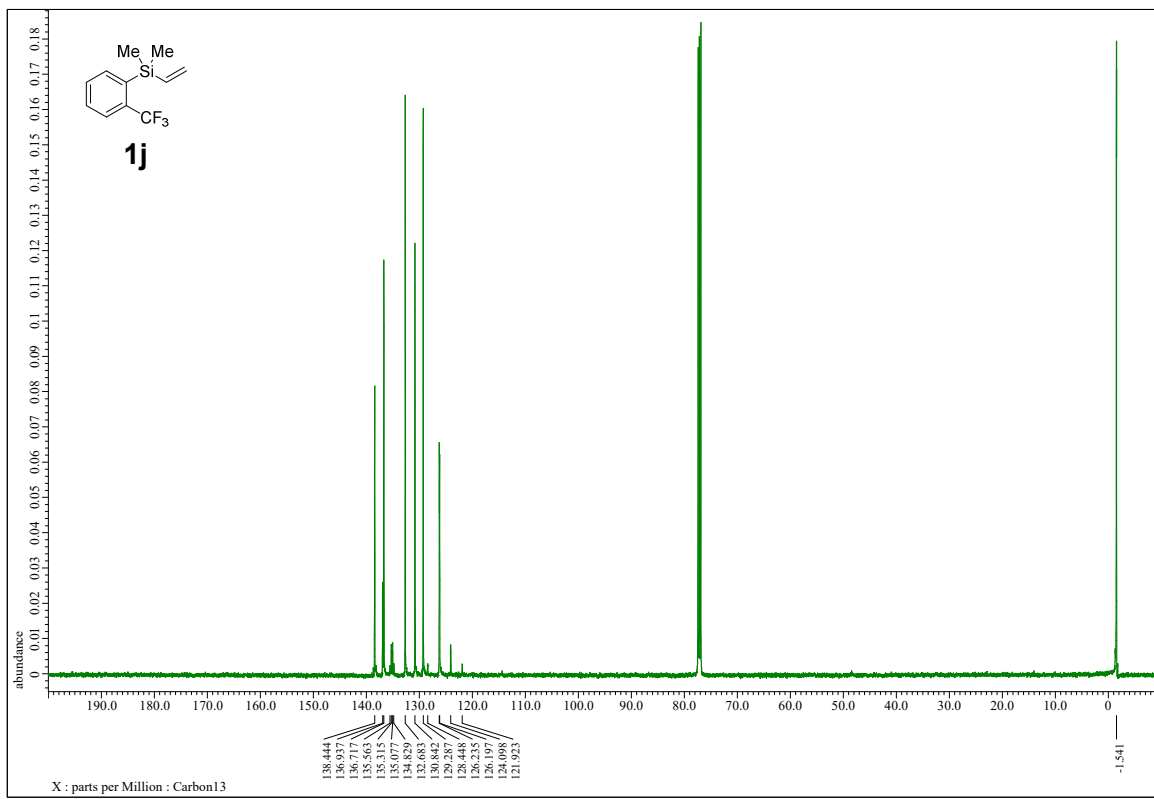

**JEOL**

|                   |                             |
|-------------------|-----------------------------|
| Filename          | = 041-ccl7_Carbon-1-2.jdf   |
| Author            | = delta                     |
| Experiment        | = carbon.jxp                |
| Sample_id         | = 041-ccl7                  |
| Solvent           | = CHLOROFORM-D              |
| Actual_Start_Time | = 21-SEP-2024 23:44:31      |
| Revision_Time     | = 21-SEP-2024 13:58:50      |
| Comment           | = single pulse decoupled ga |
| Data_Format       | = 1D COMPLEX                |
| Dim_Size          | = 26214                     |
| X_Domain          | = Carbon                    |
| Dim_Title         | = Carbon13                  |
| Dim_Units         | = [ppm]                     |
| Dimensions        | = X                         |
| Site              | = JNM-ECA500                |
| Spectrometer      | = DELTA2_NMR                |
| Field_Strength    | = 11.7473579[T] (500[MHz])  |
| X_Acq_Duration    | = 0.83361792[s]             |
| X_Domain          | = 13C                       |
| X_Freq            | = 125.76529768[MHz]         |
| X_Offset          | = 100[ppm]                  |
| X_Points          | = 32768                     |
| X_Prescans        | = 4                         |
| X_Resolution      | = 1.19959034[Hz]            |
| X_Sweep           | = 39.3081761[kHz]           |
| X_Sweep_Clipped   | = 31.44654088[kHz]          |
| Irr_Domain        | = Proton                    |
| Irr_Freq          | = 500.15991521[MHz]         |
| Irr_Offset        | = 5.0[ppm]                  |
| Clipped           | = FALSE                     |
| Scans             | = 2048                      |
| Total_Scans       | = 2048                      |
| Relaxation_Delay  | = 2[s]                      |
| Recv_gain         | = 50                        |
| Temp_Set          | = 22.5[dc]                  |
| X_90_Width        | = 12.65[us]                 |
| X_Acq_Time        | = 0.83361792[s]             |
| X_Angle           | = 90[deg]                   |
| X_Atn             | = 7[db]                     |
| X_Pulse           | = 4.2166667[us]             |
| Irr_Atn_Dec       | = 25.254[db]                |
| Irr_Atn_No        | = 25.254[db]                |
| Irr_Noise         | = WALTZ                     |
| Irr_Pwidth        | = 92[us]                    |
| Decoupling        | = TRUE                      |
| Initial_Wait      | = 1[s]                      |
| Noe               | = TRUE                      |
| Noe_Time          | = 2[s]                      |
| Repetition_Time   | = 2.83361792[s]             |

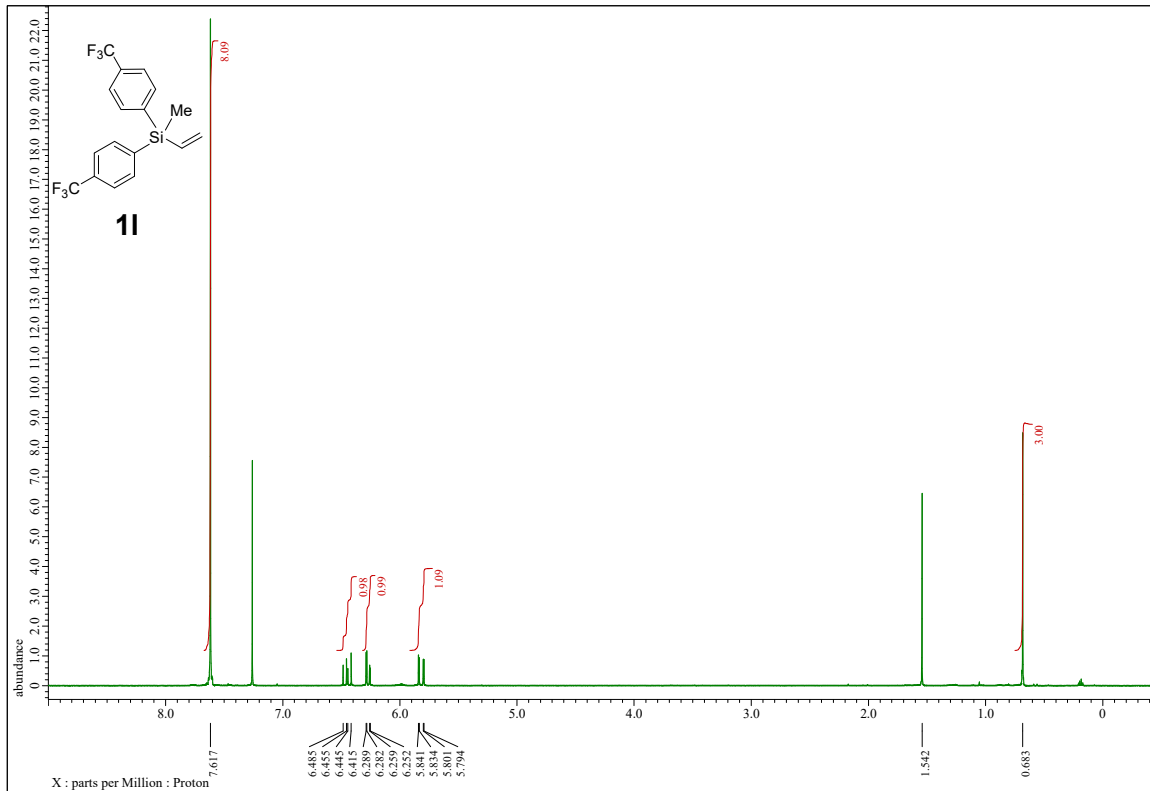

**JEOL**

|                   |                             |
|-------------------|-----------------------------|
| Filename          | = 248-063 (pCF3)2Me_Vinyl_F |
| Author            | = delta                     |
| Experiment        | = proton_jmp                |
| Sample_id         | = 248-063 (pCF3)2Me_Vinyl   |
| Solvent           | = CHLOROFORM-D              |
| Actual_Start_Time | = 21-SEP-2024 23:39:48      |
| Revision_Time     | = 20-SEP-2024 15:41:05      |
| Comment           | = single pulse              |
| Data_Format       | = 1D COMPLEX                |
| Dim_Size          | = 13107                     |
| X_Domain          | = Proton                    |
| Dim_Title         | = Proton                    |
| Dim_Units         | = [ppm]                     |
| Dimensions        | = X                         |
| Site              | = JNM-ECA500                |
| Spectrometer      | = DELTA2_NMR                |
| Field_Strength    | = 11.7473579 [T] (500[MHz]) |
| X_Acq_Duration    | = 1.74587904 [s]            |
| X_Domain          | = 1H                        |
| X_Freq            | = 500.15991521 [MHz]        |
| X_Offset          | = 5.0 [ppm]                 |
| X_Points          | = 14284                     |
| X_Prescans        | = 1                         |
| X_Resolution      | = 0.57277737 [Hz]           |
| X_Sweep           | = 9.38438438 [kHz]          |
| X_Sweep_Clipped   | = 7.50750751 [kHz]          |
| Irr_Domain        | = Proton                    |
| Irr_Freq          | = 500.15991521 [MHz]        |
| Irr_Offset        | = 5.0 [ppm]                 |
| Tri_Domain        | = Proton                    |
| Tri_Freq          | = 500.15991521 [MHz]        |
| Tri_Offset        | = 5.0 [ppm]                 |
| Clipped           | = FALSE                     |
| Scans             | = 8                         |
| Total_Scans       | = 8                         |
| Relaxation_Delay  | = 5 [s]                     |
| Recv_gain         | = 58                        |
| Temp_Set          | = 22 [dC]                   |
| X_90_Width        | = 6.7 [us]                  |
| X_Acq_Time        | = 1.74587904 [s]            |
| X_Angle           | = 45 [deg]                  |
| X_Atn             | = 2.5 [dB]                  |
| X_Pulse           | = 3.35 [us]                 |
| Irr_Mode          | = Off                       |
| Tri_Mode          | = Off                       |
| Dnbs_Preset       | = FALSE                     |
| Initial_Wait      | = 1 [s]                     |
| Repetition_Time   | = 6.74587904 [s]            |

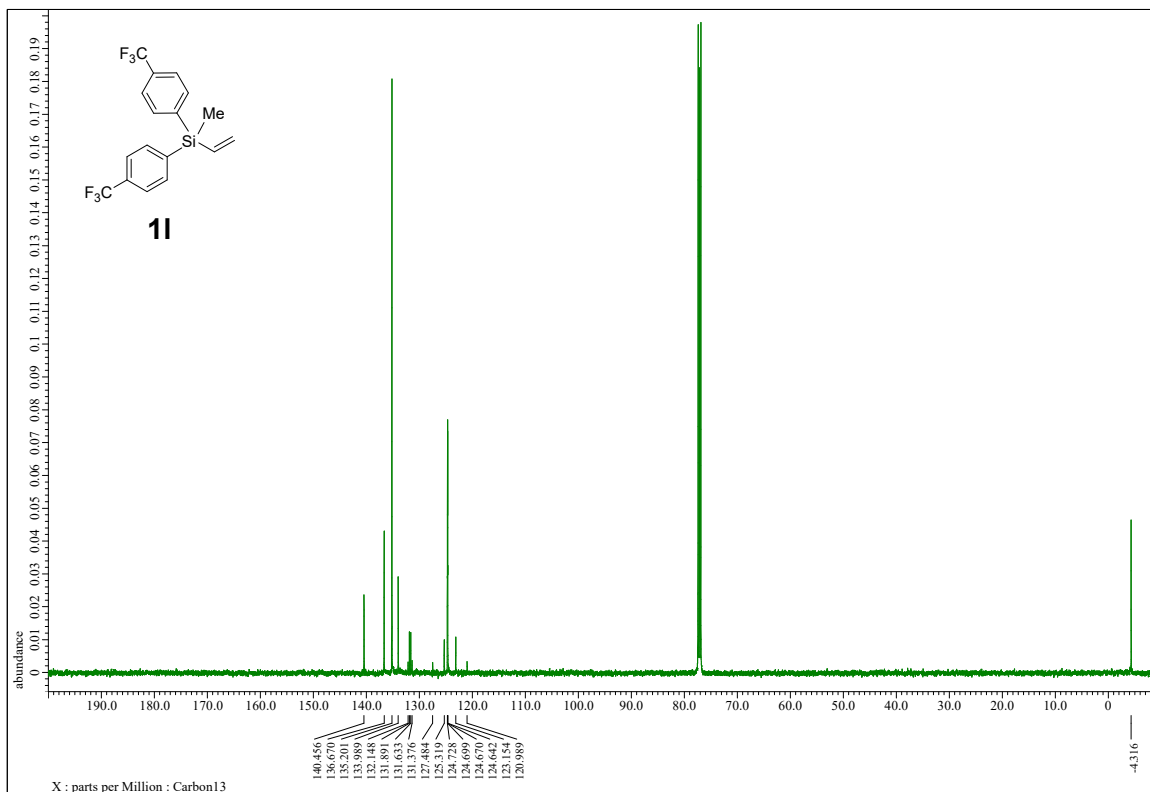

**JEOL**

|                   |                             |
|-------------------|-----------------------------|
| Filename          | = 063-GPC111-116_Carbon-1-2 |
| Author            | = delta                     |
| Experiment        | = carbon_jmp                |
| Sample_id         | = 063-GPC111-116            |
| Solvent           | = CHLOROFORM-D              |
| Actual_Start_Time | = 7-JUL-2022 11:51:58       |
| Revision_Time     | = 20-SEP-2024 14:10:00      |
| Comment           | = single pulse decoupled ga |
| Data_Format       | = 1D COMPLEX                |
| Dim_Size          | = 26214                     |
| X_Domain          | = Carbon                    |
| Dim_Title         | = Carbon13                  |
| Dim_Units         | = [ppm]                     |
| Dimensions        | = X                         |
| Site              | = JNM-ECA500                |
| Spectrometer      | = DELTA2_NMR                |
| Field_Strength    | = 11.7473579 [T] (500[MHz]) |
| X_Acq_Duration    | = 0.83361792 [s]            |
| X_Domain          | = 13C                       |
| X_Freq            | = 125.76529768 [MHz]        |
| X_Offset          | = 100 [ppm]                 |
| X_Points          | = 32768                     |
| X_Prescans        | = 4                         |
| X_Resolution      | = 1.19959034 [Hz]           |
| X_Sweep           | = 39.3081761 [kHz]          |
| X_Sweep_Clipped   | = 31.44654088 [kHz]         |
| Irr_Domain        | = Proton                    |
| Irr_Freq          | = 500.15991521 [MHz]        |
| Irr_Offset        | = 5.0 [ppm]                 |
| Clipped           | = FALSE                     |
| Scans             | = 1024                      |
| Total_Scans       | = 1024                      |
| Relaxation_Delay  | = 2 [s]                     |
| Recv_gain         | = 50                        |
| Temp_Set          | = 22 [dC]                   |
| X_90_Width        | = 12.65 [us]                |
| X_Acq_Time        | = 0.83361792 [s]            |
| X_Angle           | = 90 [deg]                  |
| X_Atn             | = 7 [dB]                    |
| X_Pulse           | = 4.2166667 [us]            |
| Irr_Atn_Dec       | = 25.254 [dB]               |
| Irr_Atn_Noise     | = 25.254 [dB]               |
| Irr_Noise         | = WALTZ                     |
| Irr_Width         | = 92 [us]                   |
| Decoupling        | = TRUE                      |
| Initial_Wait      | = 1 [s]                     |
| Noe               | = TRUE                      |
| Noe_Time          | = 2 [s]                     |
| Repetition_Time   | = 2.83361792 [s]            |

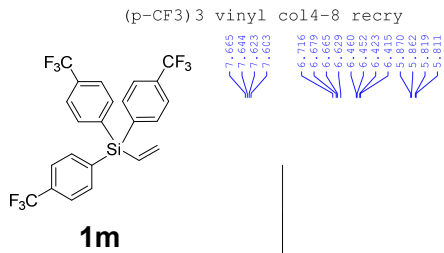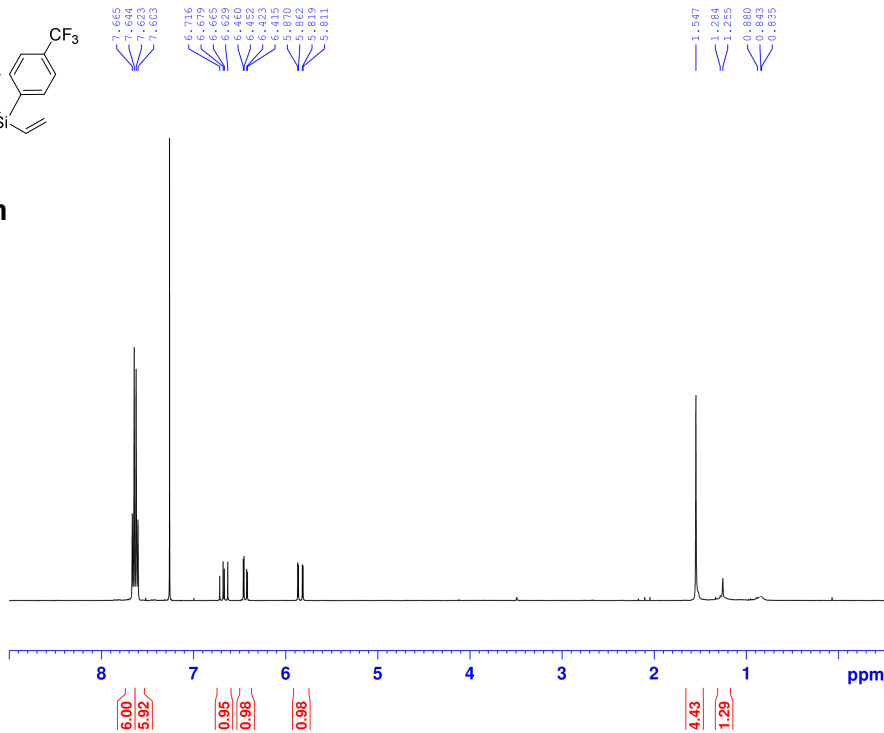

### IBB-nmr Analysis

```

NAME      NN248-052
EXPNO     2
PROCNO    1
Date_     20220606
Time      21.25
INSTRUM   av400
PROBHD    5 mm PABBO BB-
PULPROG   zg30
TD         65536
AQ         3.9846387 sec
SOLVENT   CDCl3
NS         16
DS         2
SWH        8223.685 Hz
FIDRES     0.125483 Hz
AQ         3.9846387 sec
RG         203
DW         60.800 usec
DE         6.50 usec
TE         296.9 K
D1         1.0000000 sec
D11        1
TD0        1

----- CHANNEL f1 -----
NUC1      1H
P1        14.00 usec
PL1       -1.80 dB
PL1W      14.82738590 W
SFO1      400.1324710 MHz
SI        32768
SF        400.1300096 MHz
WDW       EM
SSB       0
LB        0.30 Hz
GB        0
PC        1.00
  
```

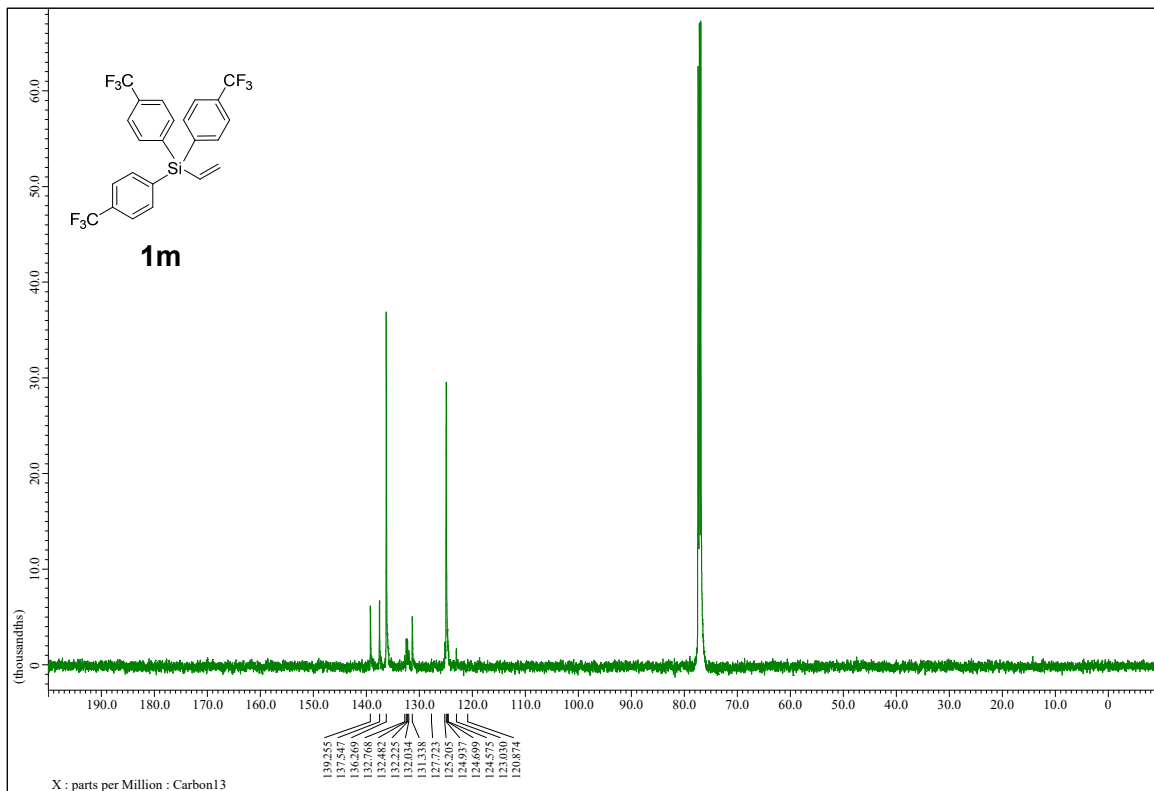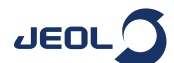

```

Filename   = 048-col2-3-recry_Carbon-1
Author     = delta
Experiment = carbon_jmp
Sample Id  = 048-col2-3-recry
Solvent    = CHLOROFORM-D
Actual_Start_Time = 3-JUN-2022 18:20:48
Revision_Time = 20-SEP-2024 14:29:07

Comment    = single pulse decoupled ga
Data_Format = 1D COMETEX
Dim_Size   = 26214
X_Domain   = Carbon
Dim_title  = Carbon13
Dim_Units  = [ppm]
Dimensions = X
Site       = JNM-ECA500
Spectrometer = DELTA2_NMR

Field_Strength = 11.7473579[T] (500[MHz])
X_Acq_Duration = 0.83361792[s]
X_Domain       = 13C
X_Freq         = 125.76529768[MHz]
X_Offset       = 100[ppm]
X_Points       = 32768
X_Prescans     = 4
X_Resolution   = 1.19959034[Hz]
X_Sweep        = 39.3081761[Hz]
X_Sweep_Clipped = 31.44654088[kHz]
Irr_Domain     = Proton
Irr_Freq       = 500.1591521[MHz]
Irr_Offset     = 5.0[ppm]
Clipped        = FALSE
Scans          = 2048
Total_Scans    = 2048

Relaxation_Delay = 2[s]
Recvr_Gain       = 50
Temp_Set         = 25.2[dc]
X_90_Width       = 12.65[us]
X_Acq_Time       = 0.83361792[s]
X_Angle          = 30[deg]
X_Attn           = 7[db]
X_Pulse          = 4.21666667[us]
Irr_Atn_Dec      = 25.254[db]
Irr_Atn_Noise   = 25.254[db]
Irr_Noise       = WALTZ
Irr_Switch       = 90[us]
Decoupling       = TRUE
Initial_Wait     = 1[s]
Noe              = TRUE
Noe_Time         = 2[s]
Repetition_Time  = 2.83361792[s]
  
```

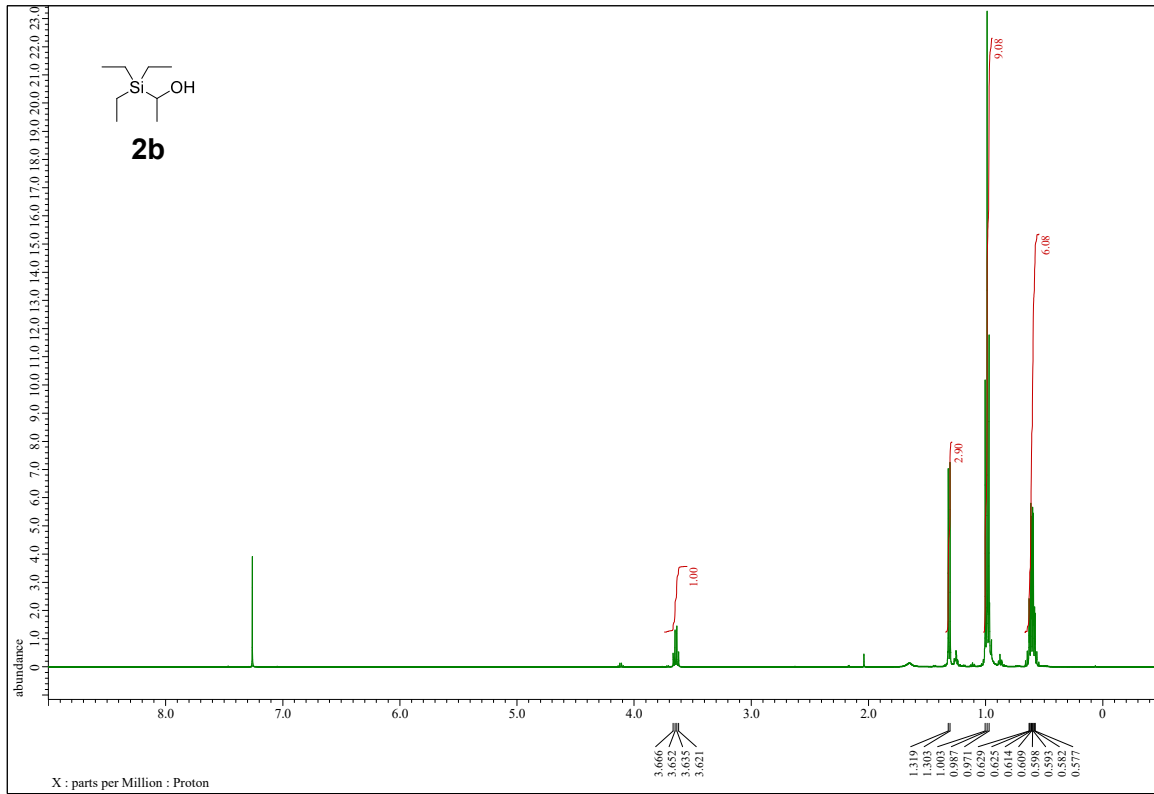

**JEOL**

Filename = 270-042-3\_c0111-16\_dist\_F  
 Author = delta  
 Experiment = proton.jcp  
 Sample\_id = 270-042-3\_c0111-16\_dist  
 Solvent = CHLOROFORM-D  
 Actual\_Start\_Time = 11-SEP-2023 15:54:49  
 Revision\_Time = 20-FEB-2024 16:51:13

Comment = single pulse  
 Data\_Format = 1D COMPLEX  
 Dim\_Size = 13107  
 X\_Domain = Proton  
 Dim\_Title = Proton  
 Dim\_Units = [ppm]  
 Dimensions = X  
 Site = JNM-ECA500  
 Spectrometer = DELTA2\_NMR

Field\_Strength = 11.7473579 [T] (500[Mhz])  
 X\_Acq\_Duration = 1.74587904 [s]  
 X\_Domain = 18  
 X\_Freq = 500.15991521 [Mhz]  
 X\_Offset = 5.0 [ppm]  
 X\_Points = 14284  
 X\_Prescans = 1  
 X\_Resolution = 0.57277737 [Hz]  
 X\_Sweep = 9.3843438 [kHz]  
 X\_Sweep\_Clipped = 7.50750751 [kHz]  
 Irr\_Domain = Proton  
 Irr\_Freq = 500.15991521 [Mhz]  
 Irr\_Offset = 5.0 [ppm]  
 Tri\_Domain = Proton  
 Tri\_Freq = 500.15991521 [Mhz]  
 Tri\_Offset = 5.0 [ppm]  
 Clipped = FALSE  
 Scans = 16  
 Total\_Scans = 16

Relaxation\_Delay = 5 [s]  
 Recv\_Gain = 42  
 Temp\_Set = 22.8 [dC]  
 X\_90\_Width = 6.7 [us]  
 X\_Acq\_Time = 1.74587904 [s]  
 X\_Angle = 45 [deg]  
 X\_Atn = 2.5 [dB]  
 X\_Pulse = 3.35 [us]  
 Irr\_Mode = Off  
 Tri\_Mode = Off  
 Dnbs\_Preset = FALS  
 Initial\_Wait = 1 [s]  
 Repetition\_Time = 6.74587904 [s]

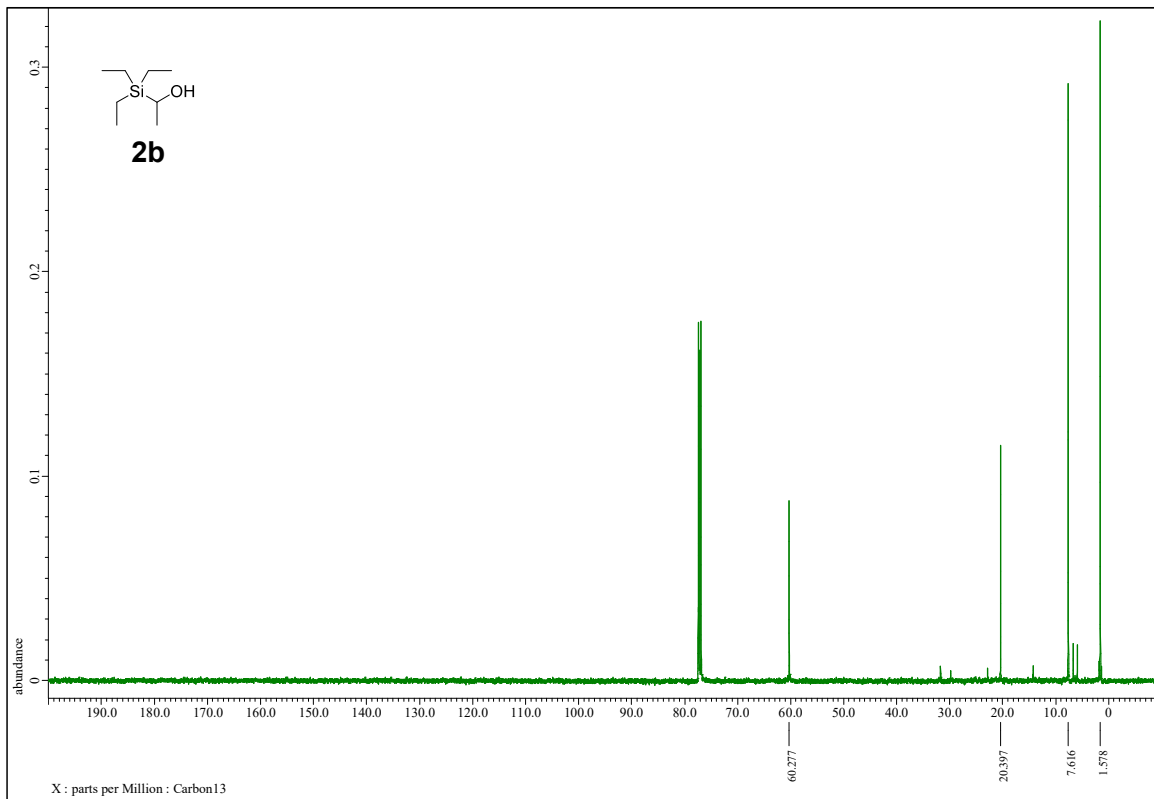

**JEOL**

Filename = 270-042-3\_c0111-16\_dist\_C  
 Author = delta  
 Experiment = carbon.jcp  
 Sample\_id = 270-042-3\_c0111-16\_dist  
 Solvent = CHLOROFORM-D  
 Actual\_Start\_Time = 11-SEP-2023 16:55:11  
 Revision\_Time = 20-FEB-2024 16:56:01

Comment = single pulse decoupled ga  
 Data\_Format = 1D COMPLEX  
 Dim\_Size = 26214  
 X\_Domain = Carbon  
 Dim\_Title = Carbon13  
 Dim\_Units = [ppm]  
 Dimensions = X  
 Site = JNM-ECA500  
 Spectrometer = DELTA2\_NMR

Field\_Strength = 11.7473579 [T] (500[Mhz])  
 X\_Acq\_Duration = 0.83361792 [s]  
 X\_Domain = 13C  
 X\_Freq = 125.76529768 [Mhz]  
 X\_Offset = 100 [ppm]  
 X\_Points = 32258  
 X\_Prescans = 4  
 X\_Resolution = 1.19959034 [Hz]  
 X\_Sweep = 39.3081761 [kHz]  
 X\_Sweep\_Clipped = 31.44654088 [kHz]  
 Irr\_Domain = Proton  
 Irr\_Freq = 500.15991521 [Mhz]  
 Irr\_Offset = 5.0 [ppm]  
 Clipped = FALSE  
 Scans = 512  
 Total\_Scans = 512

Relaxation\_Delay = 2 [s]  
 Recv\_Gain = 50  
 Temp\_Set = 22.6 [dC]  
 X\_90\_Width = 12.65 [us]  
 X\_Acq\_Time = 0.83361792 [s]  
 X\_Angle = 90 [deg]  
 X\_Atn = 7 [dB]  
 X\_Pulse = 4.2166667 [us]  
 Irr\_Atn\_Dec = 25.254 [dB]  
 Irr\_Atn\_Noise = 25.254 [dB]  
 Irr\_Noise = WBLP  
 Irr\_Fwidth = 92 [us]  
 Decoupling = TRUE  
 Initial\_Wait = 1 [s]  
 Noe = TRUE  
 Noe\_Time = 2 [s]  
 Repetition\_Time = 2.83361792 [s]

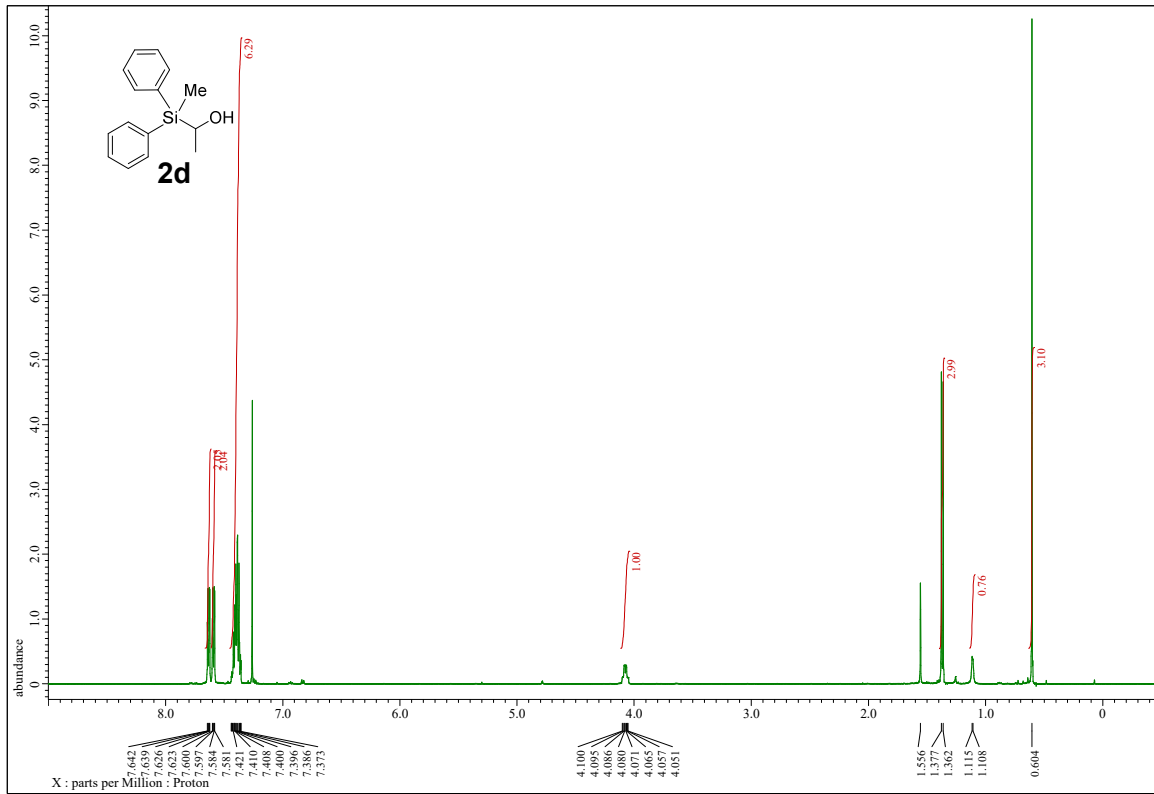

**JEOL**

|                   |                              |
|-------------------|------------------------------|
| Filename          | = 270-017-8_col12_11_Proton- |
| Author            | = delta                      |
| Experiment        | = proton.jxp                 |
| Sample_id         | = 270-017-8_col12_11         |
| Solvent           | = CHLOROFORM-D               |
| Actual_Start_Time | = 23-MAR-2024 22:36:32       |
| Revision_Time     | = 23-MAR-2024 16:55:06       |
| Comment           | = single pulse               |
| Data_Format       | = 1D COMPLEX                 |
| Dim_Size          | = 13107                      |
| X_Domain          | = Proton                     |
| Dim_Title         | = Proton                     |
| Dim_Units         | = [ppm]                      |
| Dimensions        | = X                          |
| Site              | = JNM-ECA500                 |
| Spectrometer      | = DELTA2_NMR                 |
| Field_Strength    | = 11.7473579[T] (500[MHz])   |
| X_Acq_Duration    | = 1.74587904[s]              |
| X_Domain          | = 18                         |
| X_Freq            | = 500.15991521[MHz]          |
| X_Offset          | = 5.0[ppm]                   |
| X_Points          | = 16284                      |
| X_Prescans        | = 1                          |
| X_Resolution      | = 0.57277737[Hz]             |
| X_Sweep           | = 9.38438438[kHz]            |
| X_Sweep_Clipped   | = 7.50750751[kHz]            |
| Irr_Domain        | = Proton                     |
| Irr_Freq          | = 500.15991521[MHz]          |
| Irr_Offset        | = 5.0[ppm]                   |
| Tri_Domain        | = Proton                     |
| Tri_Freq          | = 500.15991521[MHz]          |
| Tri_Offset        | = 5.0[ppm]                   |
| Clipped           | = FALSE                      |
| Scans             | = 16                         |
| Total_Scans       | = 16                         |
| Relaxation_Delay  | = 5[s]                       |
| Recv_gain         | = 50                         |
| Temp_Set          | = 19.4[dC]                   |
| X_90_Width        | = 6.7[us]                    |
| X_Acq_Time        | = 1.74587904[s]              |
| X_Angle           | = 45[deg]                    |
| X_Atn             | = 2.5[dB]                    |
| X_Pulse           | = 3.35[us]                   |
| Irr_Mode          | = Off                        |
| Tri_Mode          | = Off                        |
| Daqts_Preset      | = FIDSE                      |
| Initial_Wait      | = 1[s]                       |
| Repetition_Time   | = 6.74587904[s]              |

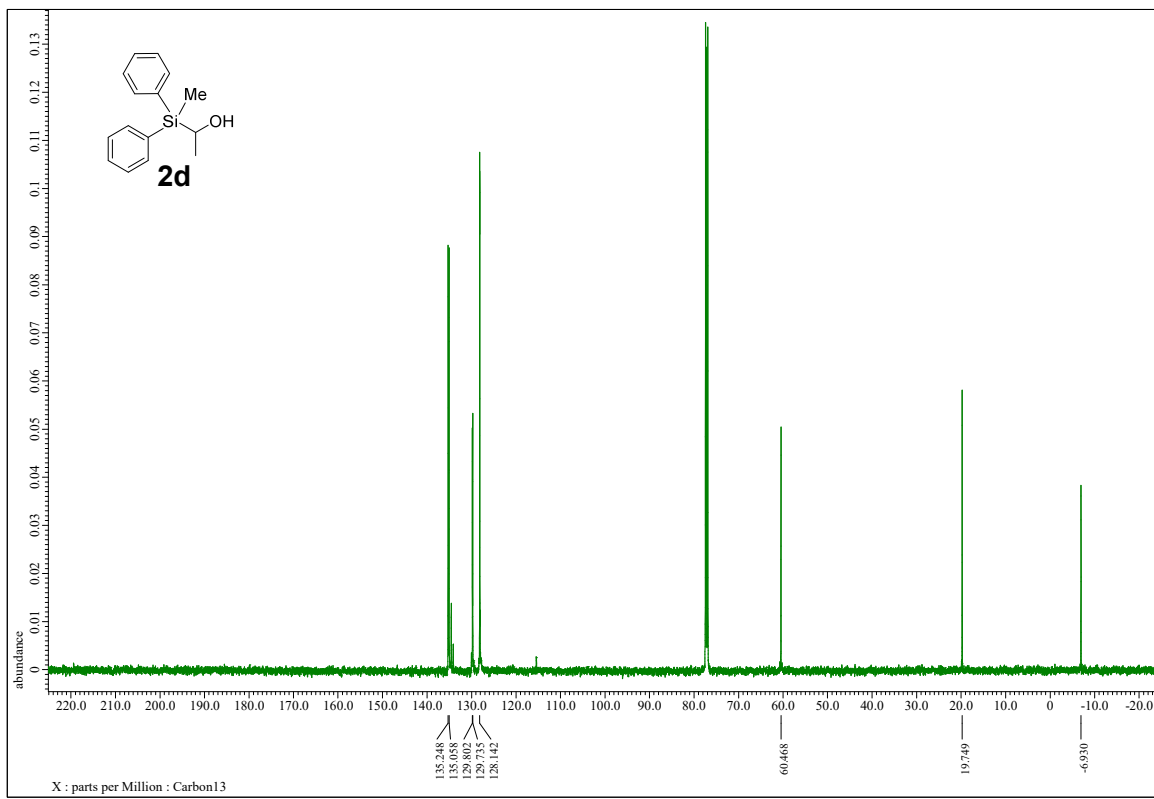

**JEOL**

|                   |                              |
|-------------------|------------------------------|
| Filename          | = 270-017-8_col13_14_Carbon- |
| Author            | = delta                      |
| Experiment        | = carbon.jxp                 |
| Sample_id         | = 270-017-8_col13_14         |
| Solvent           | = CHLOROFORM-D               |
| Actual_Start_Time | = 23-MAR-2024 20:25:22       |
| Revision_Time     | = 23-MAR-2024 23:14:39       |
| Comment           | = single pulse decoupled ga  |
| Data_Format       | = 1D COMPLEX                 |
| Dim_Size          | = 26214                      |
| X_Domain          | = Carbon                     |
| Dim_Title         | = Carbon13                   |
| Dim_Units         | = [ppm]                      |
| Dimensions        | = X                          |
| Site              | = JNM-ECA500                 |
| Spectrometer      | = DELTA2_NMR                 |
| Field_Strength    | = 11.7473579[T] (500[MHz])   |
| X_Acq_Duration    | = 0.83361792[s]              |
| X_Domain          | = 13C                        |
| X_Freq            | = 125.76529768[MHz]          |
| X_Offset          | = 100[ppm]                   |
| X_Points          | = 32768                      |
| X_Prescans        | = 4                          |
| X_Resolution      | = 1.19959034[Hz]             |
| X_Sweep           | = 39.3081761[kHz]            |
| X_Sweep_Clipped   | = 31.44654088[kHz]           |
| Irr_Domain        | = Proton                     |
| Irr_Freq          | = 500.15991521[MHz]          |
| Irr_Offset        | = 5.0[ppm]                   |
| Clipped           | = FALSE                      |
| Scans             | = 1024                       |
| Total_Scans       | = 1024                       |
| Relaxation_Delay  | = 2[s]                       |
| Recv_gain         | = 50                         |
| Temp_Set          | = 20.3[dC]                   |
| X_90_Width        | = 12.65[us]                  |
| X_Acq_Time        | = 0.83361792[s]              |
| X_Angle           | = 90[deg]                    |
| X_Atn             | = 7[db]                      |
| X_Pulse           | = 4.2166667[us]              |
| Irr_Atn_Dec       | = 25.254[db]                 |
| Irr_Atn_No        | = 25.254[db]                 |
| Irr_Noise         | = WALTZ                      |
| Irr_Pwidth        | = 92[us]                     |
| Decoupling        | = TRUE                       |
| Initial_Wait      | = 1[s]                       |
| Noe               | = TRUE                       |
| Noe_Time          | = 2[s]                       |
| Repetition_Time   | = 2.83361792[s]              |

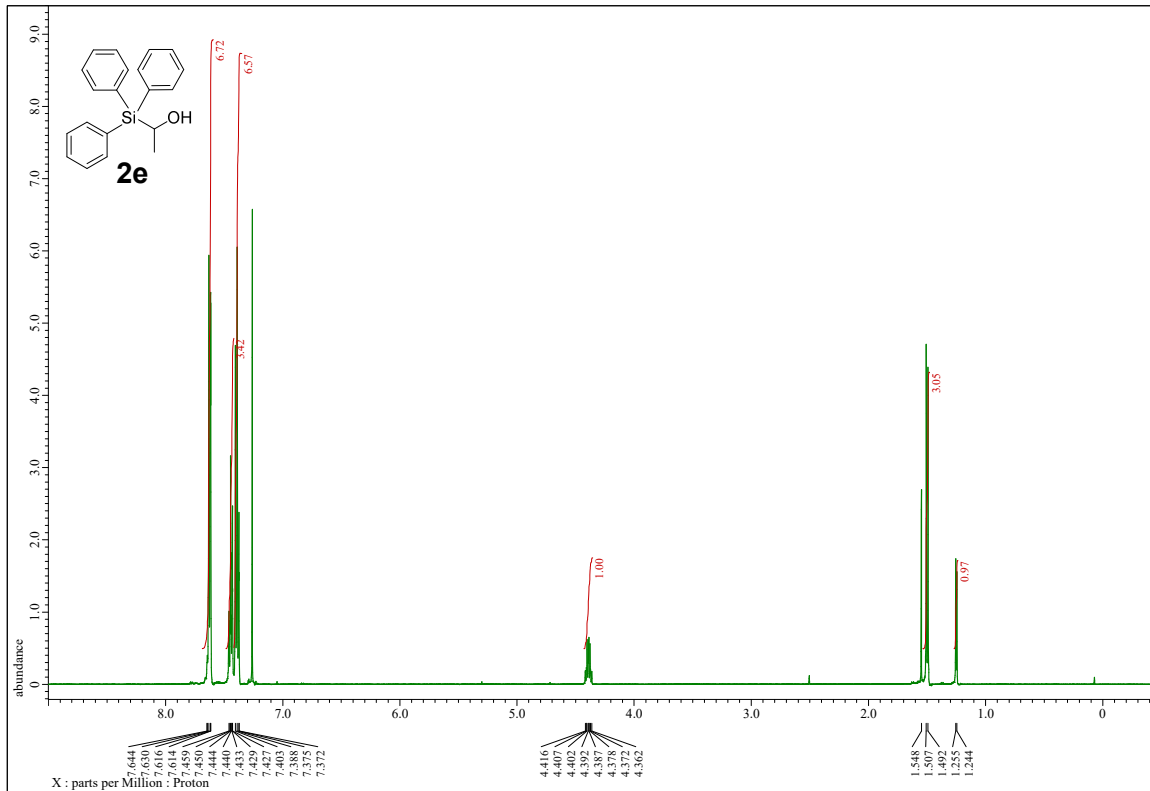

**JEOL**

|                   |                            |
|-------------------|----------------------------|
| Filename          | = 270-050-7_col2_14-15_Pro |
| Author            | = delta                    |
| Experiment        | = proton_jkp               |
| Sample_id         | = 270-050-7_col2_14-15     |
| Solvent           | = CHLOROPORM-D             |
| Actual_Start_Time | = 22-MAR-2024 22:27:18     |
| Revision_Time     | = 23-MAR-2024 16:49:33     |
| Comment           | = single pulse             |
| Data_Format       | = 1D COMPLEX               |
| Dim_Size          | = 13107                    |
| X_Domain          | = Proton                   |
| Dim_Title         | = Proton                   |
| Dim_Units         | = [ppm]                    |
| Dimensions        | = X                        |
| Site              | = JNM-ECA500               |
| Spectrometer      | = DELTA2_NMR               |
| Field_Strength    | = 11.7473579(T) (500[MHz]) |
| X_Acq_Duration    | = 1.74587904(s)            |
| X_Domain          | = 18                       |
| X_Freq            | = 500.15991521[MHz]        |
| X_Offset          | = 5.0(ppm)                 |
| X_Points          | = 14284                    |
| X_Prescans        | = 1                        |
| X_Resolution      | = 0.57277737[Hz]           |
| X_Sweep           | = 9.38484438[kHz]          |
| X_Sweep_Clipped   | = 7.50750751[kHz]          |
| Irr_Domain        | = Proton                   |
| Irr_Freq          | = 500.15991521[MHz]        |
| Irr_Offset        | = 5.0(ppm)                 |
| Tri_Domain        | = Proton                   |
| Tri_Freq          | = 500.15991521[MHz]        |
| Tri_Offset        | = 5.0(ppm)                 |
| Clipped           | = FALSE                    |
| Scans             | = 16                       |
| Total_Scans       | = 16                       |
| Relaxation_Delay  | = 5(s)                     |
| Recv_gain         | = 58                       |
| Temp_Set          | = 18.4(dC)                 |
| X_90_Width        | = 6.7(us)                  |
| X_Acq_Time        | = 1.74587904(s)            |
| X_Angle           | = 45(deg)                  |
| X_Atn             | = 2.5(dB)                  |
| X_Pulse           | = 3.35(us)                 |
| Irr_Mode          | = Off                      |
| Tri_Mode          | = Off                      |
| Daqts_Preset      | = FIDSE                    |
| Initial_Wait      | = 1(s)                     |
| Repetition_Time   | = 6.74587904(s)            |

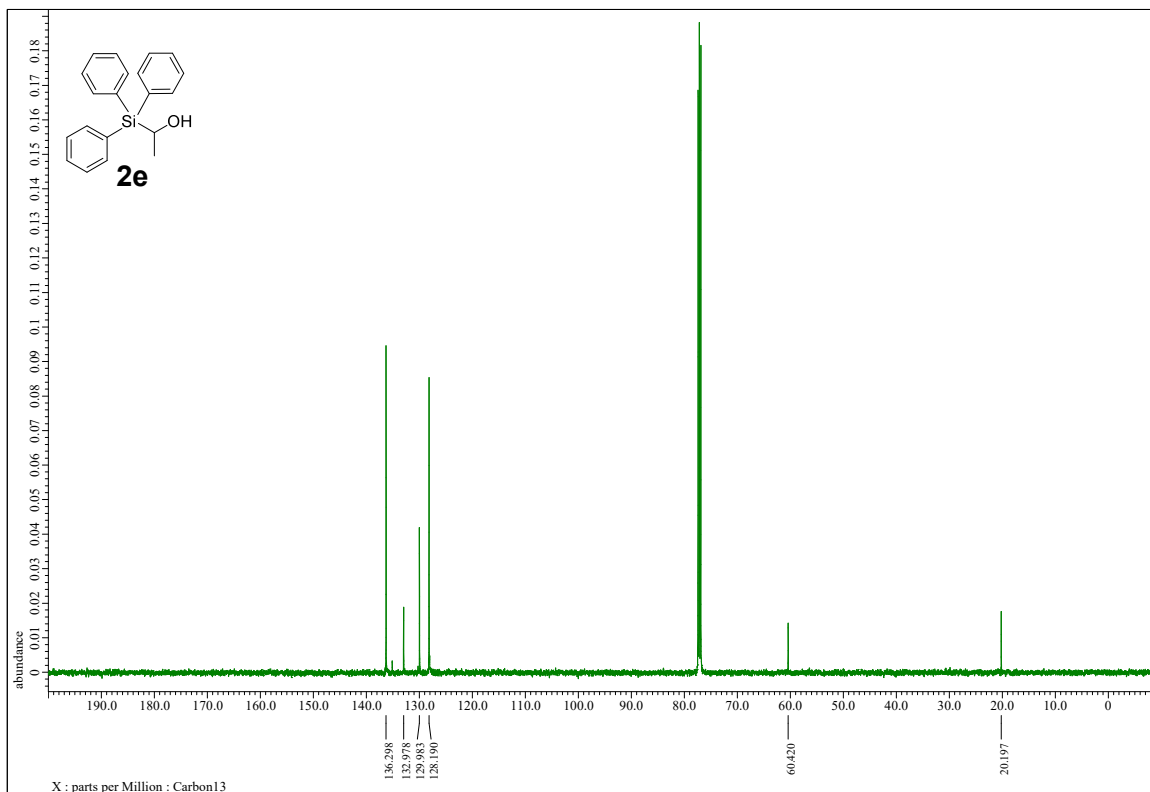

**JEOL**

|                   |                             |
|-------------------|-----------------------------|
| Filename          | = 270-050-7_col2_14-15_Carb |
| Author            | = delta                     |
| Experiment        | = carbon_jkp                |
| Sample_id         | = 270-050-7_col2_14-15      |
| Solvent           | = CHLOROPORM-D              |
| Actual_Start_Time | = 23-MAR-2024 22:46:07      |
| Revision_Time     | = 23-MAR-2024 16:46:06      |
| Comment           | = single pulse decoupled ga |
| Data_Format       | = 1D COMPLEX                |
| Dim_Size          | = 26214                     |
| X_Domain          | = Carbon                    |
| Dim_Title         | = Carbon13                  |
| Dim_Units         | = [ppm]                     |
| Dimensions        | = X                         |
| Site              | = JNM-ECA500                |
| Spectrometer      | = DELTA2_NMR                |
| Field_Strength    | = 11.7473579(T) (500[MHz])  |
| X_Acq_Duration    | = 0.83361792(s)             |
| X_Domain          | = 13C                       |
| X_Freq            | = 125.76529768[MHz]         |
| X_Offset          | = 100(ppm)                  |
| X_Points          | = 32768                     |
| X_Prescans        | = 4                         |
| X_Resolution      | = 1.19959034[Hz]            |
| X_Sweep           | = 39.3081761[kHz]           |
| X_Sweep_Clipped   | = 31.44654088[kHz]          |
| Irr_Domain        | = Proton                    |
| Irr_Freq          | = 500.15991521[MHz]         |
| Irr_Offset        | = 5.0(ppm)                  |
| Clipped           | = FALSE                     |
| Scans             | = 1024                      |
| Total_Scans       | = 1024                      |
| Relaxation_Delay  | = 2(s)                      |
| Recv_gain         | = 50                        |
| Temp_Set          | = 18.4(dC)                  |
| X_90_Width        | = 12.65(us)                 |
| X_Acq_Time        | = 0.83361792(s)             |
| X_Angle           | = 90(deg)                   |
| X_Atn             | = 7(dB)                     |
| X_Pulse           | = 4.2166667(us)             |
| Irr_Atn_Dec       | = 25.254(dB)                |
| Irr_Atn_No        | = 25.254(dB)                |
| Irr_Noise         | = WALTZ                     |
| Irr_Pwidth        | = 92(us)                    |
| Decoupling        | = TRUE                      |
| Initial_Wait      | = 1(s)                      |
| Noe               | = TRUE                      |
| Noe_Time          | = 2(s)                      |
| Repetition_Time   | = 2.83361792(s)             |

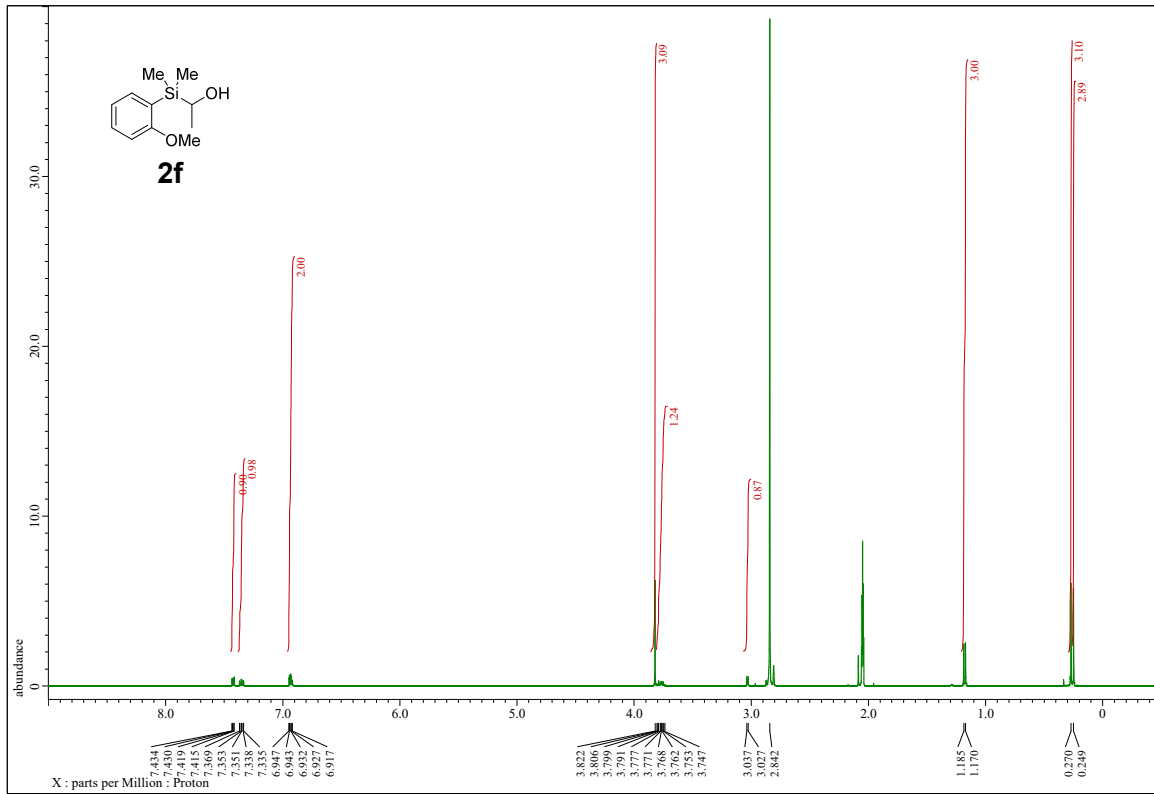

**JEOL**

|                   |                             |
|-------------------|-----------------------------|
| Filename          | = 248-032_(o-OMe)Me2_1-OH_F |
| Author            | = delta                     |
| Experiment        | = proton_jmp                |
| Sample_id         | = 248-032_(o-OMe)Me2_1-OH   |
| Solvent           | = ACETONE-D6                |
| Actual_Start_Time | = 4-OCT-2023 18:26:56       |
| Revision_Time     | = 20-FEB-2024 17:04:10      |
| Comment           | = single pulse              |
| Data_Format       | = 1D_COMPLEX                |
| Dim_Size          | = 13107                     |
| X_Domain          | = Proton                    |
| Dim_Title         | = Proton                    |
| Dim_Units         | = [ppm]                     |
| Dimensions        | = X                         |
| Site              | = JNM-ECA500                |
| Spectrometer      | = DELTA2_NMR                |
| Field_Strength    | = 11.7473579[T] (500[MHz])  |
| X_Acq_Duration    | = 1.74587904[s]             |
| X_Domain          | = 1H                        |
| X_Freq            | = 500.15991521[MHz]         |
| X_Offset          | = 5.0[ppm]                  |
| X_Points          | = 14384                     |
| X_Prescans        | = 1                         |
| X_Resolution      | = 0.57277737[Hz]            |
| X_Sweep           | = 9.38438438[kHz]           |
| X_Sweep_Clipped   | = 7.50750751[kHz]           |
| Irr_Domain        | = Proton                    |
| Irr_Freq          | = 500.15991521[MHz]         |
| Irr_Offset        | = 5.0[ppm]                  |
| Tri_Domain        | = Proton                    |
| Tri_Freq          | = 500.15991521[MHz]         |
| Tri_Offset        | = 5.0[ppm]                  |
| Clipped           | = FALSE                     |
| Scans             | = 8                         |
| Total_Scans       | = 8                         |
| Relaxation_Delay  | = 5[s]                      |
| Recv_gain         | = 54                        |
| Temp_Set          | = 21.3[degC]                |
| X_90_Width        | = 6.7[us]                   |
| X_Acq_Time        | = 1.74587904[s]             |
| X_Angle           | = 45[deg]                   |
| X_Atn             | = 2.5[db]                   |
| X_Pulse           | = 3.35[us]                  |
| Irr_Mode          | = Off                       |
| Tri_Mode          | = Off                       |
| Dnls_Preset       | = FALSE                     |
| Initial_Wait      | = 1[s]                      |
| Repetition_Time   | = 6.74587904[s]             |

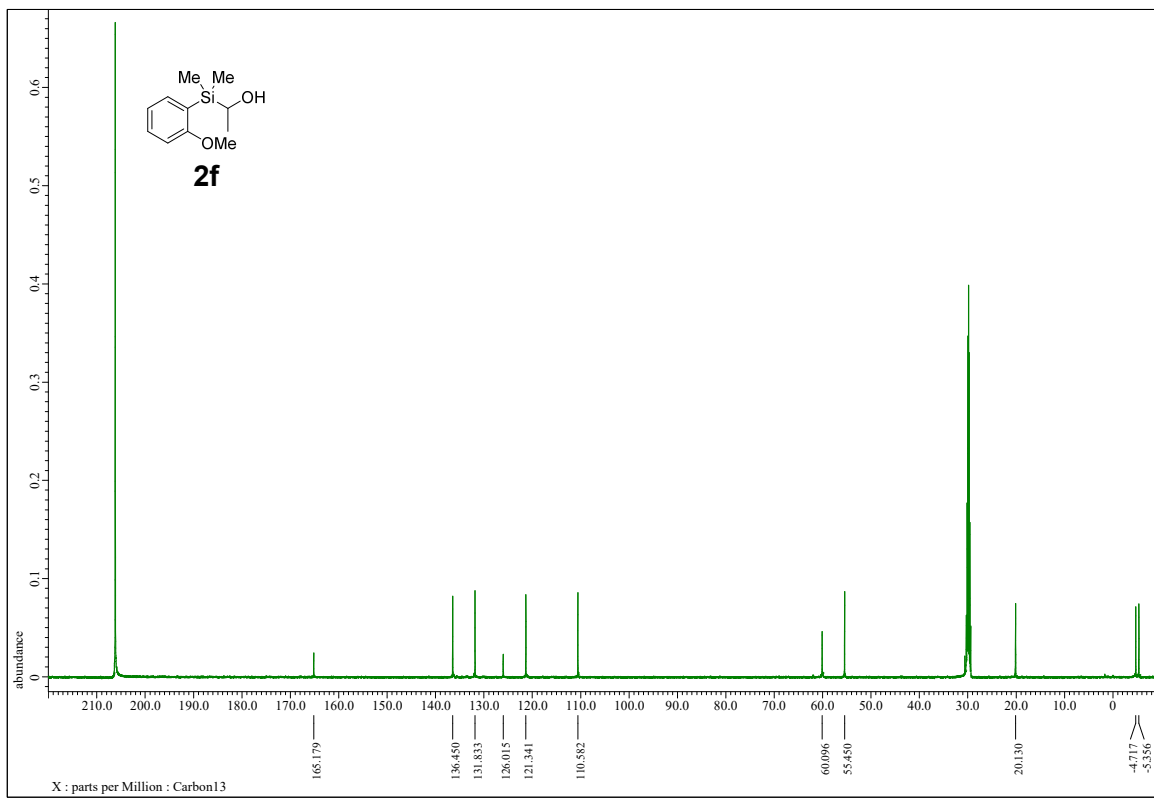

**JEOL**

|                   |                             |
|-------------------|-----------------------------|
| Filename          | = 032-co113-16_Carbon-1-3.j |
| Author            | = delta                     |
| Experiment        | = carbon_jmp                |
| Sample_id         | = 032-co113-16              |
| Solvent           | = ACETONE-D6                |
| Actual_Start_Time | = 13-JUL-2022 16:23:23      |
| Revision_Time     | = 20-FEB-2024 16:07:52      |
| Comment           | = single pulse decoupled ga |
| Data_Format       | = 1D_COMPLEX                |
| Dim_Size          | = 26214                     |
| X_Domain          | = Carbon                    |
| Dim_Title         | = Carbon13                  |
| Dim_Units         | = [ppm]                     |
| Dimensions        | = X                         |
| Site              | = JNM-ECA500                |
| Spectrometer      | = DELTA2_NMR                |
| Field_Strength    | = 11.7473579[T] (500[MHz])  |
| X_Acq_Duration    | = 0.83361792[s]             |
| X_Domain          | = 13C                       |
| X_Freq            | = 125.76529768[MHz]         |
| X_Offset          | = 100[ppm]                  |
| X_Points          | = 32768                     |
| X_Prescans        | = 4                         |
| X_Resolution      | = 1.19959034[Hz]            |
| X_Sweep           | = 39.3081761[kHz]           |
| X_Sweep_Clipped   | = 31.44654088[kHz]          |
| Irr_Domain        | = Proton                    |
| Irr_Freq          | = 500.15991521[MHz]         |
| Irr_Offset        | = 5.0[ppm]                  |
| Clipped           | = FALSE                     |
| Scans             | = 1024                      |
| Total_Scans       | = 1024                      |
| Relaxation_Delay  | = 2[s]                      |
| Recv_gain         | = 50                        |
| Temp_Set          | = 21[degC]                  |
| X_90_Width        | = 12.65[us]                 |
| X_Acq_Time        | = 0.83361792[s]             |
| X_Angle           | = 90[deg]                   |
| X_Atn             | = 7[db]                     |
| X_Pulse           | = 4.2166667[us]             |
| Irr_Atn_Dec       | = 25.254[db]                |
| Irr_Atn_No        | = 25.254[db]                |
| Irr_Noise         | = WALTZ                     |
| Irr_Pwidth        | = 92[us]                    |
| Decoupling        | = TRUE                      |
| Initial_Wait      | = 1[s]                      |
| Noe               | = TRUE                      |
| Noe_Time          | = 2[s]                      |
| Repetition_Time   | = 2.83361792[s]             |

p-Ome HB col126-29 acetone 4/30

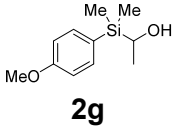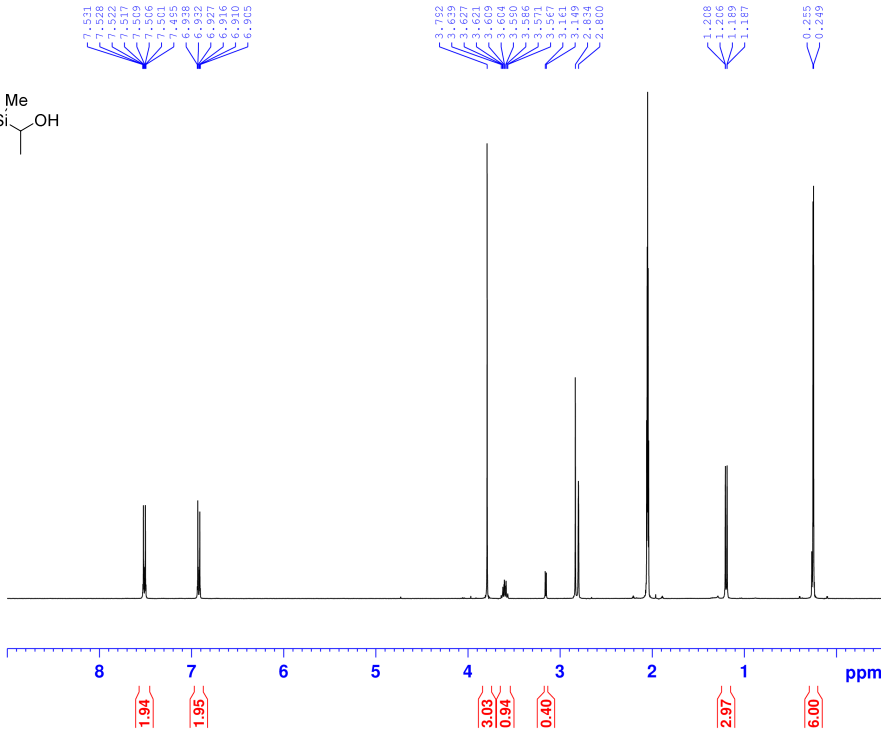

**IBB-nmr Analysis**

```

NAME          NN248-039
EXPNO         8
PROCNO        1
Date_         20220430
Time          20.20
INSTRUM       av400
PROBHD        5 mm PABBO BB-
PULPROG       zg30
TD            65536
SOLVENT       Acetone
NS            16
DS            2
SWH           8223.685 Hz
FIDRES        0.125483 Hz
AQ            3.9846387 sec
RG            203
DW            60.800 usec
DE            6.50 usec
TE            296.5 K
D1            1.00000000 sec
TD0           1

===== CHANNEL f1 =====
NUC1          1H
P1            14.00 usec
PL1           -1.80 dB
PL1W         14.82738590 W
SFO1         400.1324710 MHz
SI            32768
SF            400.1300067 MHz
WDW           EM
SSB           0
LB            0.30 Hz
GB            0
PC            1.00
    
```

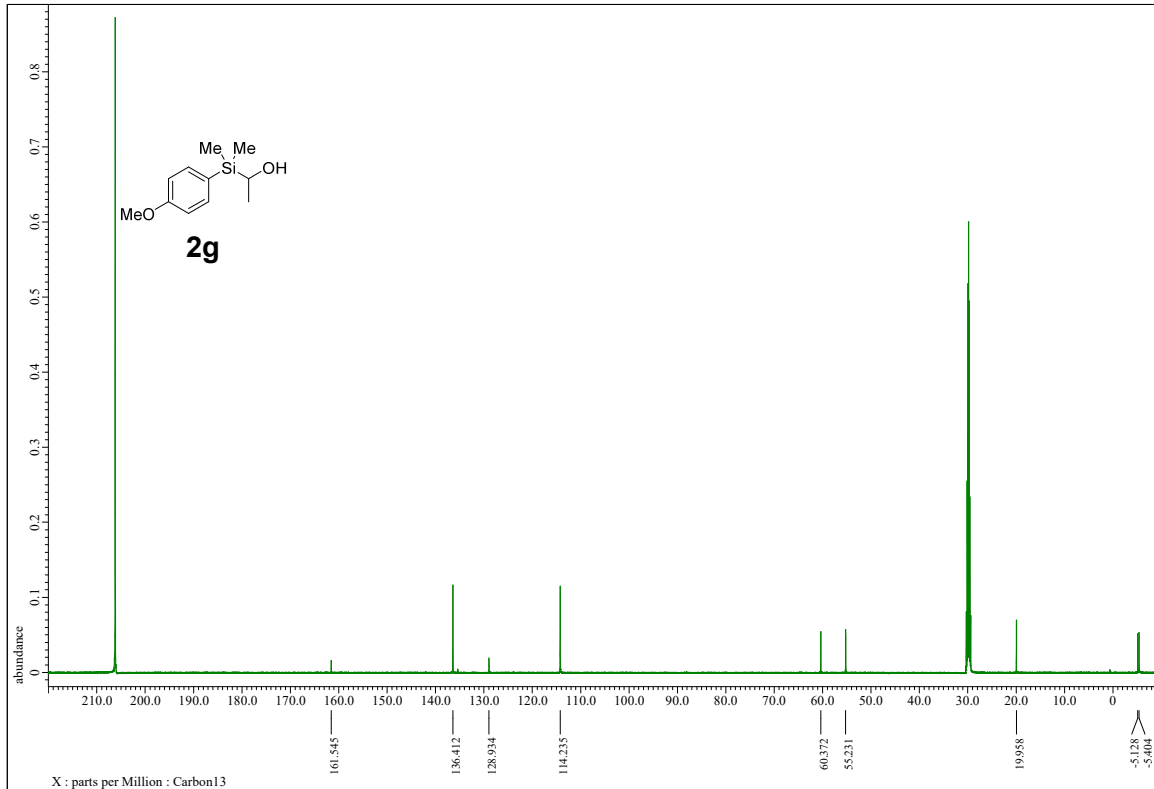

```

Filename      = 039-col126-29_Carbon-1-3.j
Author        = delta
Experiment    = carbon_jmp
Sample id     = 039-col126-29
Solvent       = ACETONE-D6
Actual Start Time = 2-MAR-2022 15:30:31
Revision Time = 20-FEB-2024 15:47:48

Comment       = single pulse decoupled ga
Data Format    = 1D COMPLEX
Dim_Size      = 26214
X_Domain     = Carbon
Dim_Title     = Carbon13
Dim_Units     = [ppm]
Dimensions    = X
Site          = JNM-ECA500
Spectrometer  = DELTA2_NMR

Field Strength = 11.7473579 [T] (500 [MHz])
X_Acq_Duration = 0.83361792 [s]
X_Tomax       = 13C
X_Freq        = 125.76529768 [MHz]
X_Offset      = 100 [ppm]
X_Points      = 32768
X_Prescans    = 4
X_Resolution  = 1.19959034 [Hz]
X_Sweep       = 39.3081761 [kHz]
X_Sweep_Clipped = 31.44654088 [kHz]
Irr_Domain    = Proton
Irr_Freq      = 500.15991521 [MHz]
Irr_Offset    = 5.0 [ppm]
Clipped       = FALSE
Scans         = 2048
Total_scans   = 2048

Relaxation_Delay = 2 [s]
Recvr_gain      = 50
Temp_Set        = 22.1 [dC]
X_90_Width     = 12.65 [us]
X_Acq_Time     = 0.83361792 [s]
X_Angle        = 90 [deg]
X_Atn          = 7 [dB]
X_Pulse        = 4.2166667 [us]
Irr_Atn_Dec    = 25.254 [dB]
Irr_Atn_Noise = 25.254 [dB]
Irr_Noise      = 1 [s]
Irr_Pwidth     = 92 [us]
Decoupling     = TRUE
Initial_Wait   = 1 [s]
Noe            = TRUE
Noe_Time       = 2 [s]
Repetition_Time = 2.83361792 [s]
    
```



# IBB-nmr Analysis

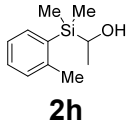

o-Me HB coll11-13 dry

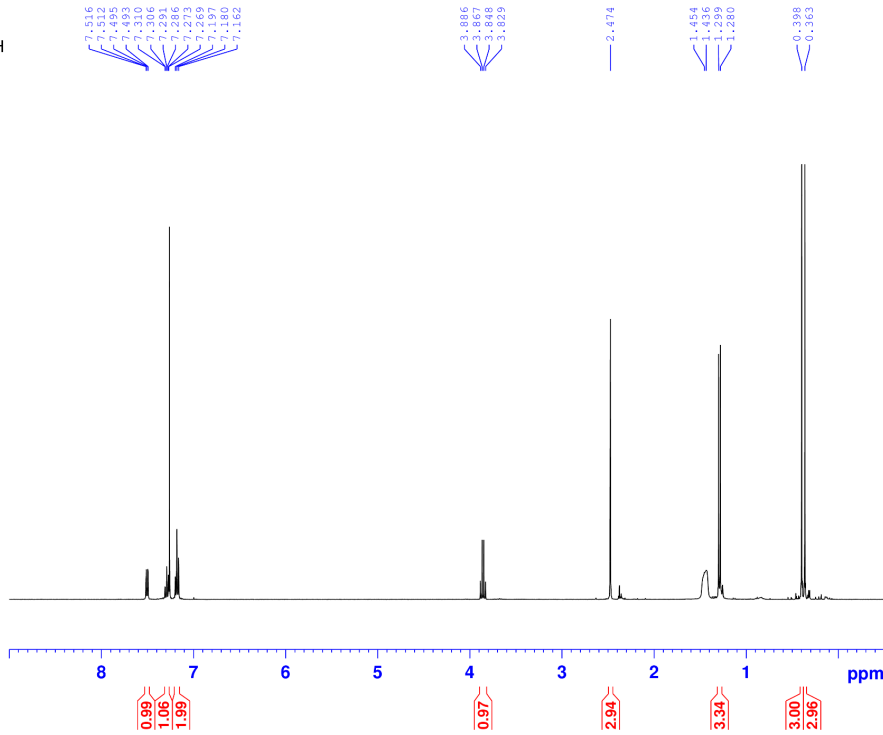

```

NAME          NN248-046
EXPNO         5
PROCNO        1
Date_         20220517
Time          21.14
INSTRUM       av400
PROBHD        5 mm PABBO BB-
PULPROG       zg30
TD            65536
AQ            3.9846387
SOLVENT       CDCl3
NS            16
DS            2
SWH           8223.685 Hz
FIDRES        0.125483 Hz
AQ            3.9846387
RG            203
DW            60.800 usec
DE            6.50 usec
TE            297.0 K
D1            1.0000000
TDO           1
===== CHANNEL f1 =====
NUC1          1H
P1            14.00 usec
PL1           -1.80 dB
PL1W          14.82738590 W
SFO1          400.1324710 MHz
SI            32768
SF            400.1300096 MHz
WDW           EM
SSB           0
LB            0.30 Hz
GB            0
PC            1.00
    
```

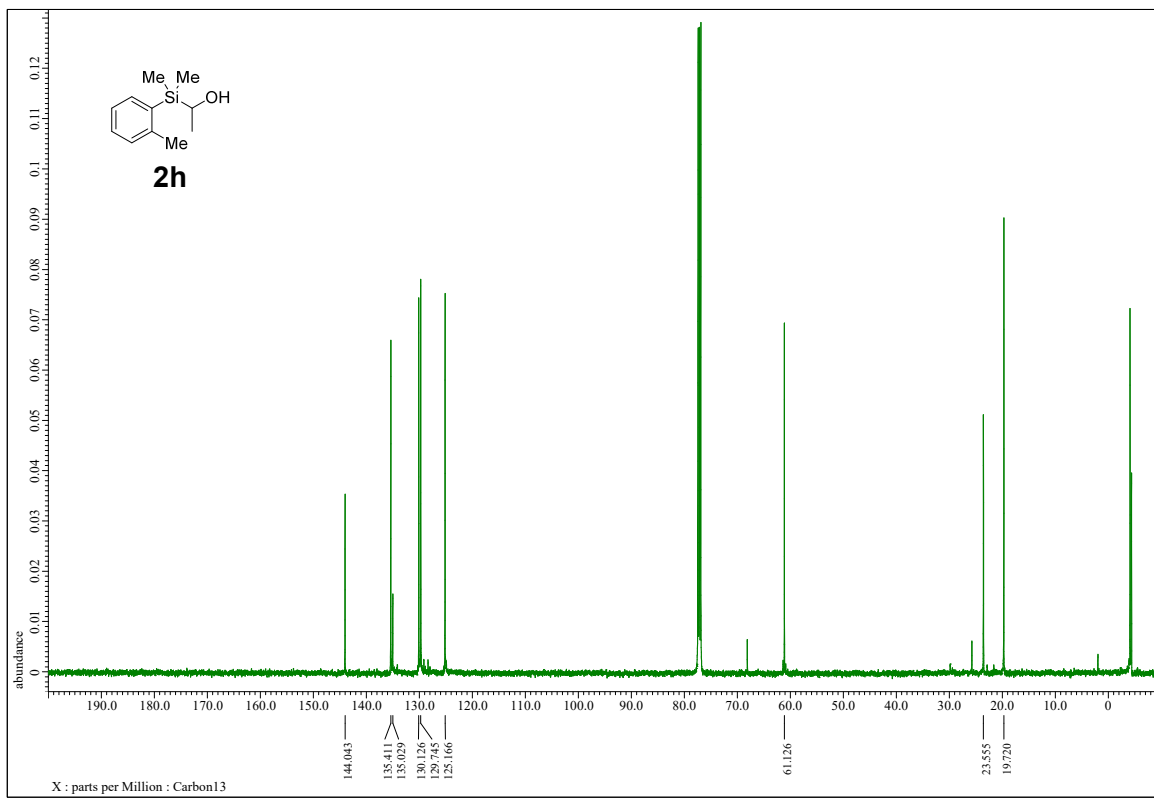

```

Filename      = 045-coll11-13_Carbon-1-2.j
Author        = delta
Experiment    = carbon_jmp
Sample_id     = 045-coll11-13
Solvent       = CHLOROFORM-D
Actual_Start Time = 21-MAR-2022 17:37:06
Revision_Time = 20-FEB-2024 16:22:43

Comment       = single pulse decoupled ga
Data Format    = 1D COMPLEX
Dim_Size      = 26214
X_Domain     = Carbon
Dim_Title     = Carbon13
Dim_Units     = [ppm]
Dimensions    = X
Site          = JNM-ECA500
Spectrometer  = DELTA2_NMR

Field_Strength = 11.7473579 [T] (500 [MHz])
X_Acq_Duration = 0.83361792 [s]
X_P1           = 13C
X_Freq         = 125.76529768 [MHz]
X_Offset       = 100 [ppm]
X_Points       = 32768
X_Prescans     = 4
X_Resolution   = 1.19959034 [Hz]
X_Sweep        = 39.3081761 [kHz]
X_Sweep_Clipped = 31.44654088 [kHz]
Irr_Domain     = Proton
Irr_Freq       = 500.15991521 [MHz]
Irr_Offset     = 5.0 [ppm]
Clipped        = FALSE
Scans          = 2048
Total_scans    = 2048

Relaxation_Delay = 2 [s]
Recvc_gain      = 50
Temp_Set        = 22.4 [dC]
X_90_Width     = 12.65 [us]
X_Acq_Time     = 0.83361792 [s]
X_Angle        = 90 [deg]
X_Atn          = 7 [dB]
X_Pulse        = 4.2166667 [us]
Irr_Atn_Dec    = 25.254 [dB]
Irr_Atn_Noise = 25.254 [dB]
Irr_Noise     = WALTZ
Irr_Pwidth     = 92 [us]
Decoupling     = TRUE
Initial_Wait    = 1 [s]
Noe            = TRUE
Noe_Time       = 2 [s]
Repetition_Time = 2.83361792 [s]
    
```

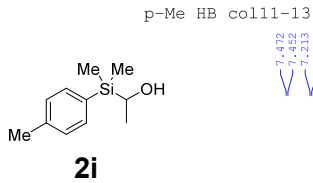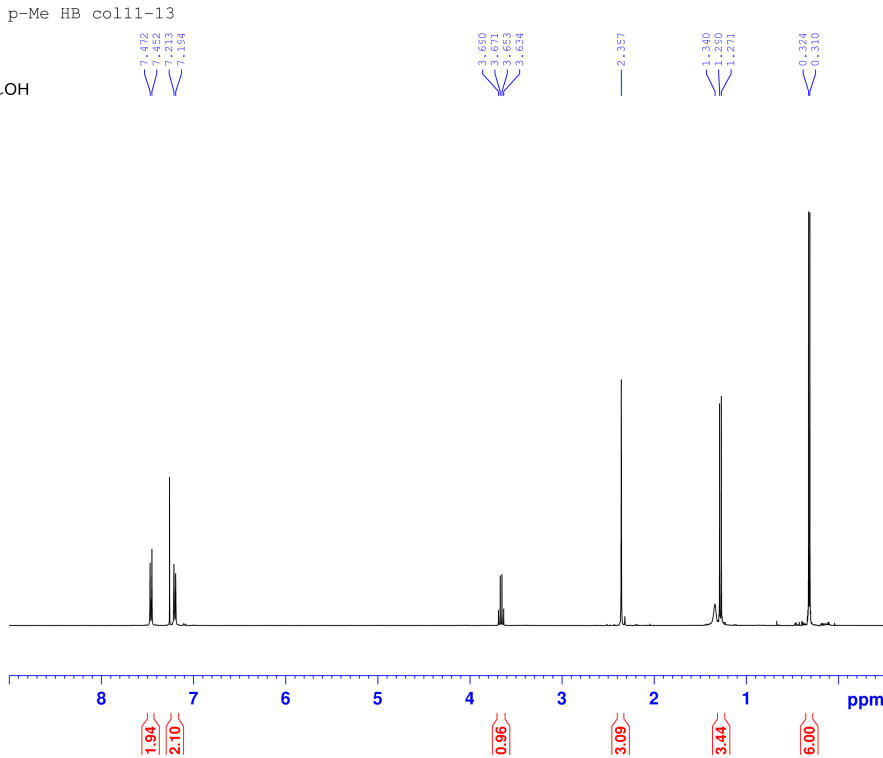

### IBB-nmr Analysis

```

NAME          NN248-037
EXPNO         2
PROCNO        1
Date_         20220422
Time         20.52
INSTRUM       av400
PROBHD        5 mm PABBO BB-
PULPROG       zg30
TD            65536
SOLVENT       CDCl3
NS            16
DS            2
SWH           8223.685 Hz
FIDRES        0.125483 Hz
AQ            3.9846387 sec
RG            203
DW            60.800 usec
DE            6.50 usec
TE            296.9 K
D1            1.0000000 sec
TD0           1

===== CHANNEL f1 =====
NUC1          1H
P1            14.00 usec
PL1           -1.80 dB
PL1W          14.82738590 W
SFO1          400.1324710 MHz
SI            32768
SF            400.1300096 MHz
WDW           EM
SGB           0
LB            0.30 Hz
GB            0
PC            1.00
  
```

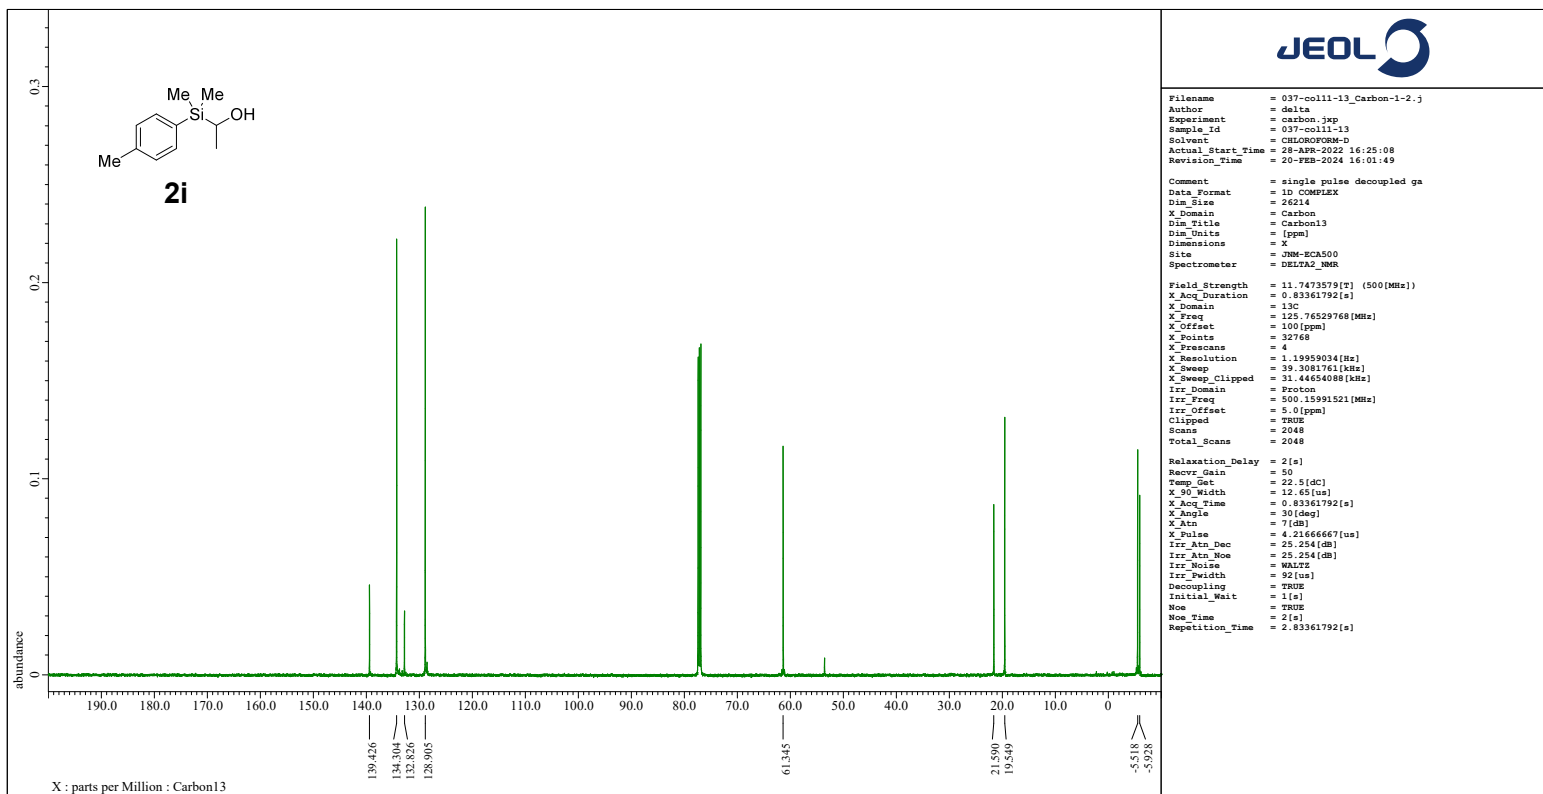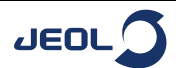

```

Filename      = 037-coll11-13_Carbon-1-2.j
Author        = delta
Experiment    = carbon_jmp
Sample_id     = 037-coll11-13
Solvent       = CHLOROFORM-D
Actual_Start Time = 20-APR-2022 16:25:08
Revision_Time = 20-FEB-2024 16:01:49

Comment       = single pulse decoupled ga
Data Format    = 1D COMPLEX
Dim_Size      = 26214
X_Domain     = Carbon
Dim_Title     = Carbon13
Dim_Units     = [ppm]
Dimensions    = X
Site          = JNM-ECA500
Spectrometer  = DELTA2_NMR

Field_Strength = 11.7473579 [T] (500 [MHz])
X_Acq_Duration = 0.83361792 [s]
X_Domain      = 13C
X_Freq        = 125.76529768 [MHz]
X_Offset      = 100 [ppm]
X_Points      = 32768
X_Prescans    = 4
X_Resolution  = 1.19959034 [Hz]
X_Sweep       = 39.3081761 [kHz]
X_Sweep_Clipped = 31.44654088 [kHz]
Irr_Domain    = Proton
Irr_Freq      = 500.15991521 [MHz]
Irr_Offset    = 5.0 [ppm]
Clipped       = TRUE
Scans         = 2048
Total_scans   = 2048

Relaxation_Delay = 2 [s]
Recvc_gain      = 50
Temp_Set        = 22.5 [dC]
X_90_Width     = 12.65 [us]
X_Acq_Time     = 0.83361792 [s]
X_Angle        = 90 [deg]
X_Attn         = 7 [dB]
X_Pulse        = 4.2166667 [us]
Irr_Atn_Dec    = 25.254 [dB]
Irr_Atn_Noise = 25.254 [dB]
Irr_Noise     = WALTZ
Irr_Width      = 92 [us]
Decoupling     = TRUE
Initial_Wait   = 1 [s]
Noe            = TRUE
Noe_Time       = 2 [s]
Repetition_Time = 2.83361792 [s]
  
```

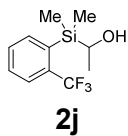

o-CF3 HB coll12-13 GPC 121-127min 7/11

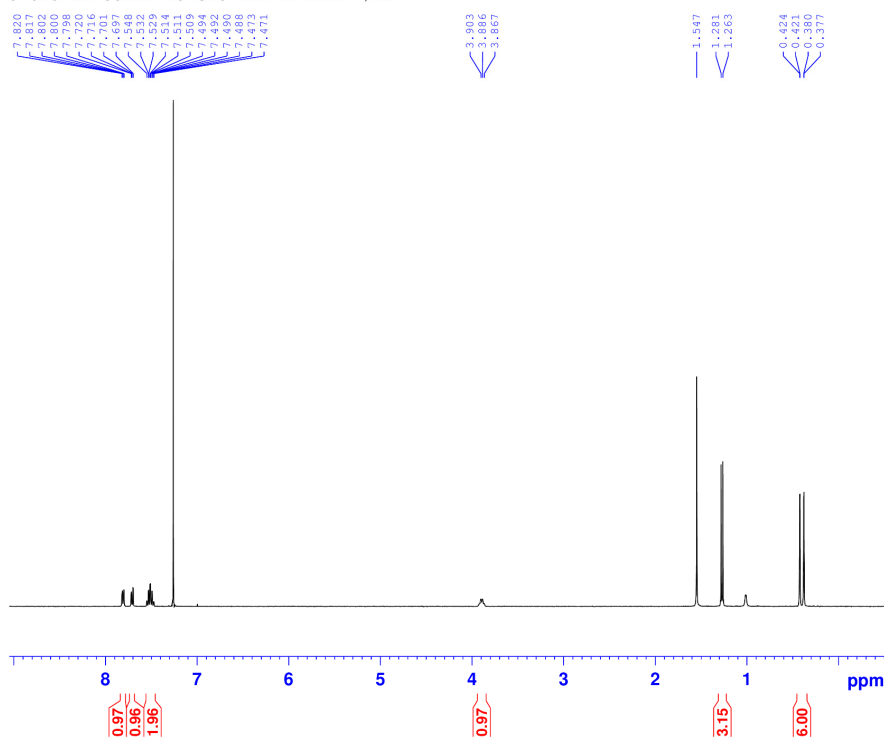

**IBB-nmr Analysis**

```

NAME          NN248-049
EXPNO         7
PROCNO        1
Date_         20220711
Time          21.31
INSTRUM       av400
PROBHD        5 mm PABBO BB-
PULPROG       zg30
TD            65536
SOLVENT       CDCl3
NS            4
DS            2
SWH           8223.685 Hz
FIDRES        0.125483 Hz
AQ            3.9846387 sec
RG            203
DW            60.800 usec
DE            6.50 usec
TE            297.4 K
D1            1.0000000 sec
TD0           1
  
```

```

===== CHANNEL f1 =====
NUC1          1H
P1            14.00 usec
PL1           -1.80 dB
PL1W          14.82738590 W
SFO1          400.1324710 MHz
SI            32768
SF            400.1300096 MHz
WDW           EM
SSB           0
LB            0.30 Hz
GB            0
PC            1.00
  
```

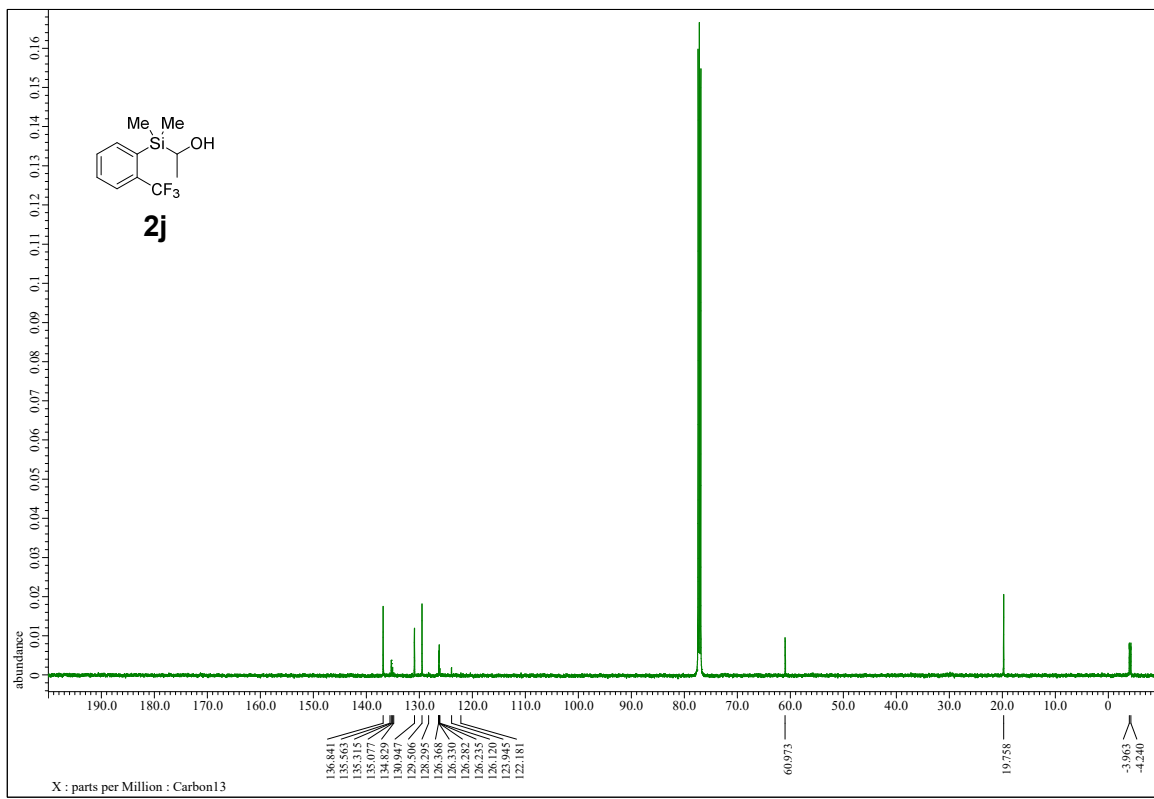

**JEOL**

```

Filename      = o-CF3_Me2_10H_13C-2.jdf
Author        = delta
Experiment    = carbon.jxp
Sample_id     = 049-coll12-13-GPC
Solvent       = CHLOROFORM-D
Actual_Start Time = 11-JUL-2022 22:47:38
Revision_Time = 20-FEB-2024 16:20:00

Comment      = single pulse decoupled ga
Data Format   = 1D COMPLEX
Dim_Size     = 26214
X_Domain    = Carbon
Dim_Title    = Carbon13
Dim_Units    = [ppm]
Dimmisions   = X
Site         = JNM-ECA500
Spectrometer = DELTA2_NMR

Field_Strength = 11.7473579(T) (500[MHz])
X_Acq_Duration = 0.83361792(s)
X_Tomax       = 13C
X_Freq        = 125.76529768[MHz]
X_Offset      = 100[ppm]
X_Points      = 32768
X_Sweeps      = 4
X_Resolution  = 1.19959034[Hz]
X_Sweep       = 39.3081761[kHz]
X_Sweep_Clipped = 31.44654088[kHz]
Irr_Domain    = Proton
Irr_Freq      = 500.15991521[MHz]
Irr_Offset    = 5.0[ppm]
Clipped       = TRUE
Scans         = 4096
Total_scans   = 4096

Relaxation_Delay = 2[s]
Recvc_gain      = 50
Temp_Set       = 22.2[dc]
X_90_Width     = 12.65[us]
X_Acq_Time     = 0.83361792(s)
X_Angle        = 90[deg]
X_Atn          = 7[db]
X_Pulse        = 4.2166667[us]
Irr_Atn_Dec    = 25.254[db]
Irr_Atn_Noise = 25.254[db]
Irr_Noise     = 1[s]
Irr_Pwidth     = 92[us]
Decoupling     = TRUE
Initial_Wait   = 1[s]
Noe            = TRUE
Noe_Time       = 2[s]
Repetition_Time = 2.83361792[s]
  
```

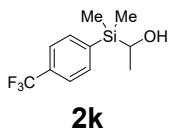

p-CF3 HB col125-28

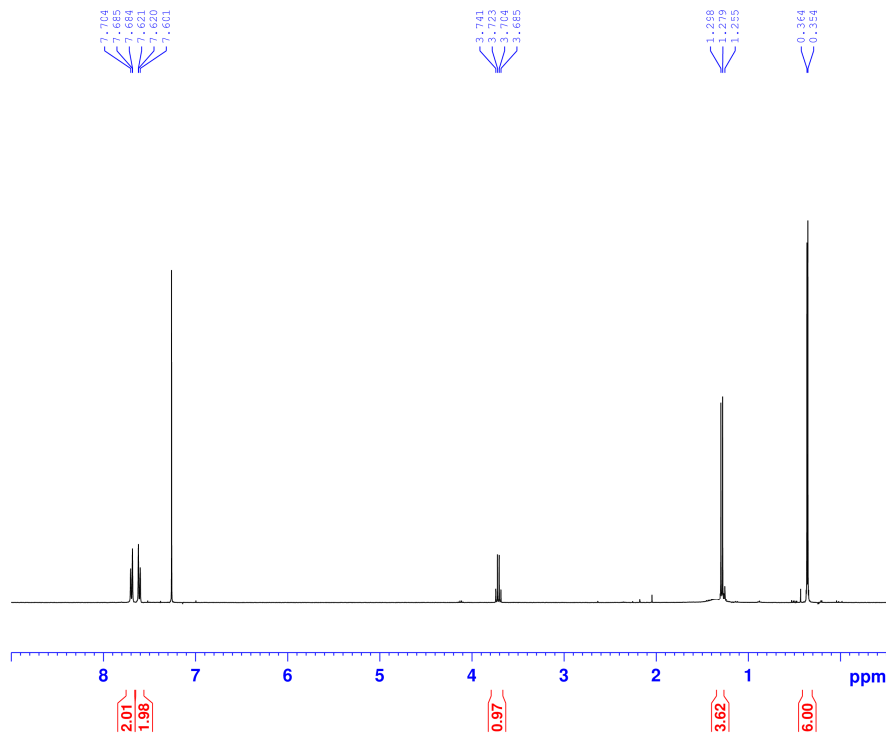

**IBB-nmr Analysis**

```

NAME          NN248-030
EXPNO         2
PROCNO        1
Date_         20220329
Time         23.19
INSTRUM       av400
PROBHD        5 mm PABBO BB-
PULPROG       zg30
TD            65536
SOLVENT       CDCl3
NS            16
DS            2
SWH           8223.685 Hz
FIDRES        0.125483 Hz
AQ            3.9846387 sec
RG            203
DW            60.800 usec
DE            6.50 usec
TE            296.2 K
D1            1.0000000 sec
D11           1
D12           1
D13           1
D14           1
D15           1
D16           1
D17           1
D18           1
D19           1
D20           1

===== CHANNEL f1 =====
NUC1          1H
P1            14.00 usec
PL1           -1.80 dB
PL1W         14.82738590 W
SFO1          400.1324710 MHz
SI            32768
SF            400.1300096 MHz
WDW           EM
SSB           0
LB            0.30 Hz
GB            0
PC            1.00
  
```

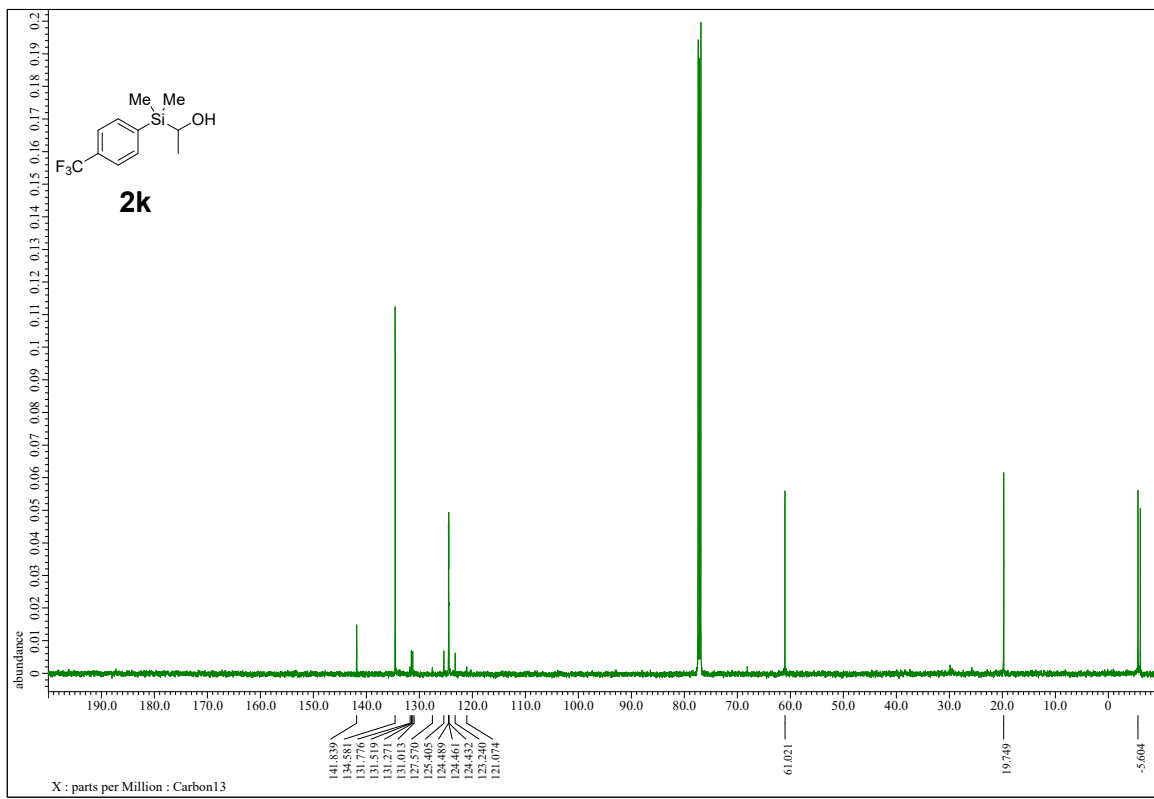

**JEOL**

```

Filename      = 030-col12528_Carbon-1-2.jd
Author        = delta
Experiment    = carbon_jmp
Sample_id     = 030-col12528
Solvent       = CHLOROFORM-D
Actual_Start Time = 30-MAR-2022 15:13:13
Revision_Time = 20-FEB-2024 15:52:48

Comment       = single pulse decoupled ga
Data Format    = 1D COMPLEX
Dim_Size      = 26214
X_Domain     = Carbon
Dim_Title     = Carbon13
Dim_Units    = [ppm]
Dimensions    = X
Site          = JNM-ECA500
Spectrometer  = DELTA2_NMR

Field_Strength = 11.7473579 [T] (500 [MHz])
X_Acq_Duration = 0.83361792 [s]
X_Tomax       = 13C
X_Freq        = 125.76529768 [MHz]
X_Offset      = 100 [ppm]
X_Points      = 32768
X_Prescans    = 4
X_Resolution  = 1.19959034 [Hz]
X_Sweep       = 39.3081761 [kHz]
X_Sweep_Clipped = 31.44654088 [kHz]
Irr_Domain    = Proton
Irr_Freq      = 500.15991521 [MHz]
Irr_Offset    = 5.0 [ppm]
Clipped       = FALSE
Scans         = 1024
Total_scans   = 1024

Relaxation_Delay = 2 [s]
Recvc_gain      = 50
Temp_Set        = 21.3 [dC]
X_90_Width     = 12.65 [us]
X_Acq_Time     = 0.83361792 [s]
X_Angle        = 90 [deg]
X_Atn          = 7 [dB]
X_Pulse        = 4.2166667 [us]
Irr_Atn_Dec    = 25.254 [dB]
Irr_Atn_Noise = 25.254 [dB]
Irr_Noise     = 1 [s]
Irr_Width     = 92 [us]
Decoupling     = TRUE
Initial_Wait   = 1 [s]
Noe            = TRUE
Noe_Time       = 2 [s]
Repetition_Time = 2.83361792 [s]
  
```

(p-CF3)2Me HB coll11-14 6/24

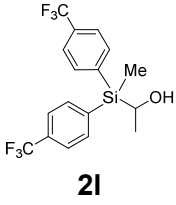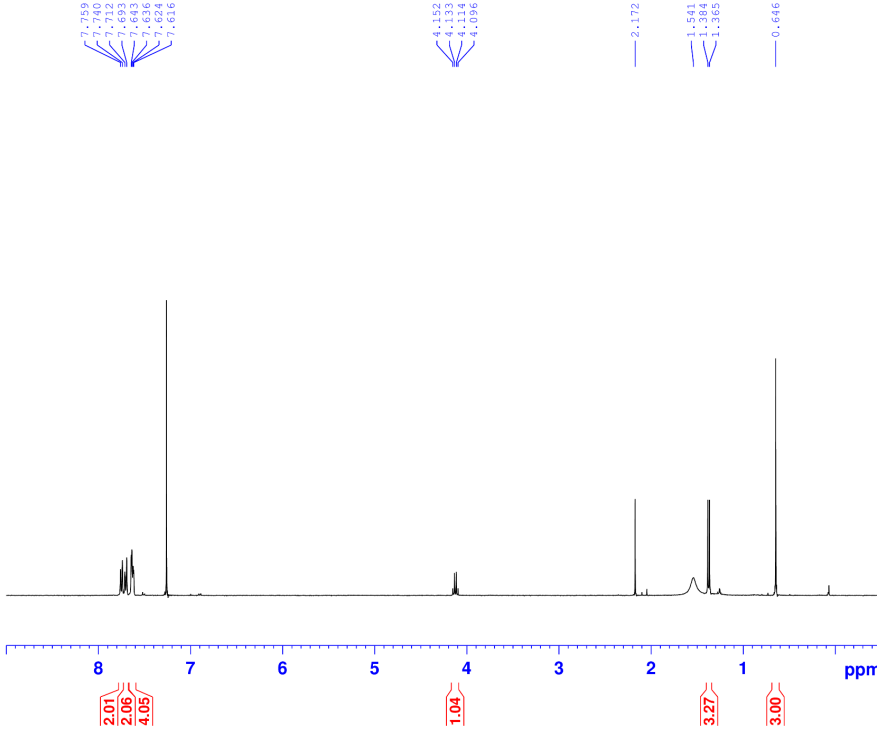

### IBB-nmr Analysis

```

NAME          NN248-066
EXPNO         4
PROCNO        1
Date_         20220624
Time          14.38
INSTRUM       av400
PROBHD        5 mm PABBO BB-
PULPROG       zg30
TD            65536
SOLVENT       CDCl3
NS            4
DS            2
SWH           8223.685 Hz
FIDRES        0.125483 Hz
AQ            3.9846387 sec
RG            203
DW            60.800 usec
DE            6.50 usec
TE            297.2 K
D1            1.0000000 sec
TD0           1

===== CHANNEL f1 =====
NUC1          1H
P1            14.00 usec
PL1          -1.80 dB
PL1W         14.82738590 W
SFO1         400.1324710 MHz
SI           32768
SF           400.1300096 MHz
WDW           EM
SSB           0
LB           0.30 Hz
GB           0
PC           1.00

```

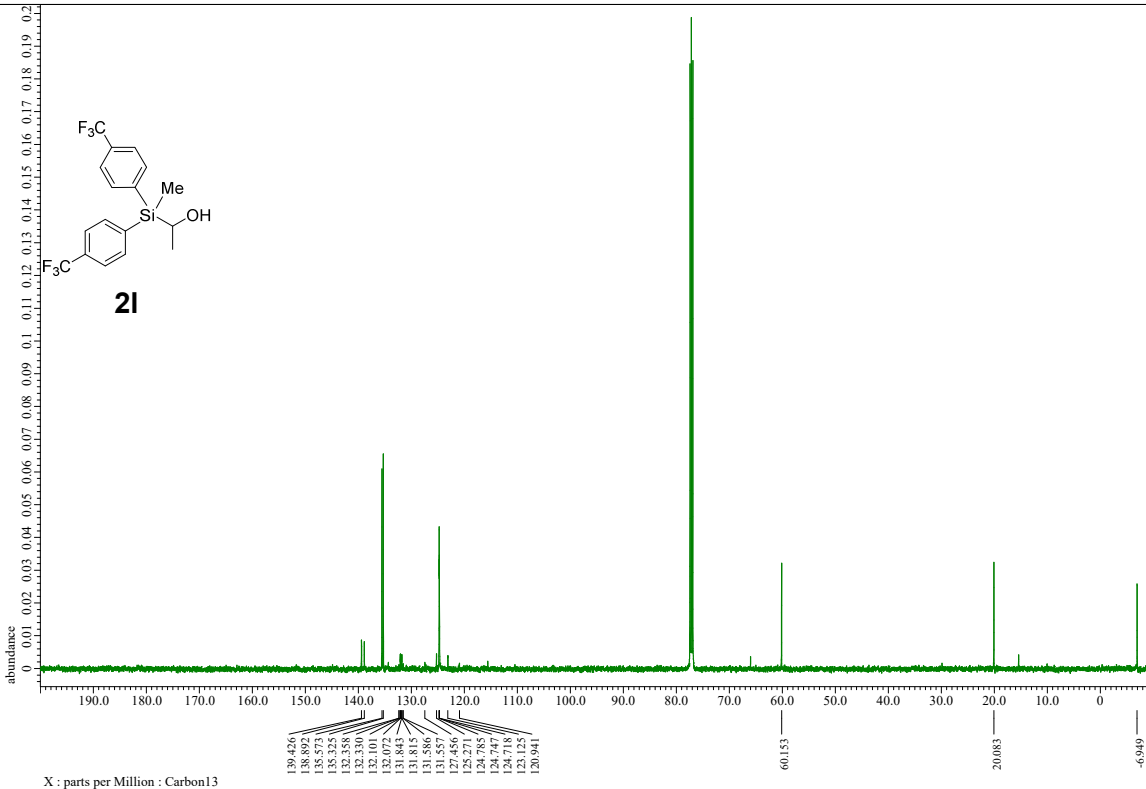

```

Filename      = 066-coll11-14_Carbon-1-2.j
Author        = delta
Experiment    = carbon_jmp
Sample_id     = 066-coll11-14
Solvent       = CHLOROFORM-D
Actual_Start Time = 7-30L-2022 12:49:13
Revision_Time = 20-7EB-2024 16:27:45

Comment       = single pulse decoupled ga
Data Format    = 1D COMPLEX
Dim_Size      = 26214
X_Domain     = Carbon
Dim_Title     = Carbon13
Dim_Units    = [ppm]
Dimensions    = X
Site          = JNM-ECA500
Spectrometer  = DELTA2_NMR

Field_Strength = 11.7473579[T] (500[Mhz])
X_Acq_Duration = 0.83361792[s]
X_Tomax       = 13C
X_Freq        = 125.76529768[Mhz]
X_Offset      = 100[ppm]
X_Points      = 32768
X_Prescans    = 4
X_Resolution  = 1.15959034[Hz]
X_Sweep       = 39.3081761[kHz]
X_Sweep_Clipped = 31.44654088[kHz]
Irr_Domain    = Proton
Irr_Freq      = 500.15991521[Mhz]
Irr_Offset    = 5.0[ppm]
Clipped       = FALSE
Scans         = 1024
Total_scans   = 1024

Relaxation_Delay = 2[s]
Recvc_gain      = 50
Temp_Set       = 22.1[dc]
X_90_Width     = 12.65[us]
X_Acq_Time     = 0.83361792[s]
X_Angle        = 90[deg]
X_Atn         = 7[db]
X_Pulse        = 4.2166667[us]
Irr_Atn_Dec    = 25.254[db]
Irr_Atn_Noise = 25.254[db]
Irr_Noise     = 1[us]
Irr_Width     = 92[us]
Decoupling     = TRUE
Initial_Wait   = 1[s]
Noe            = TRUE
Noe_Time       = 2[s]
Repetition_Time = 2.83361792[s]

```

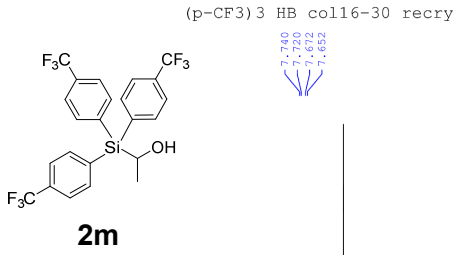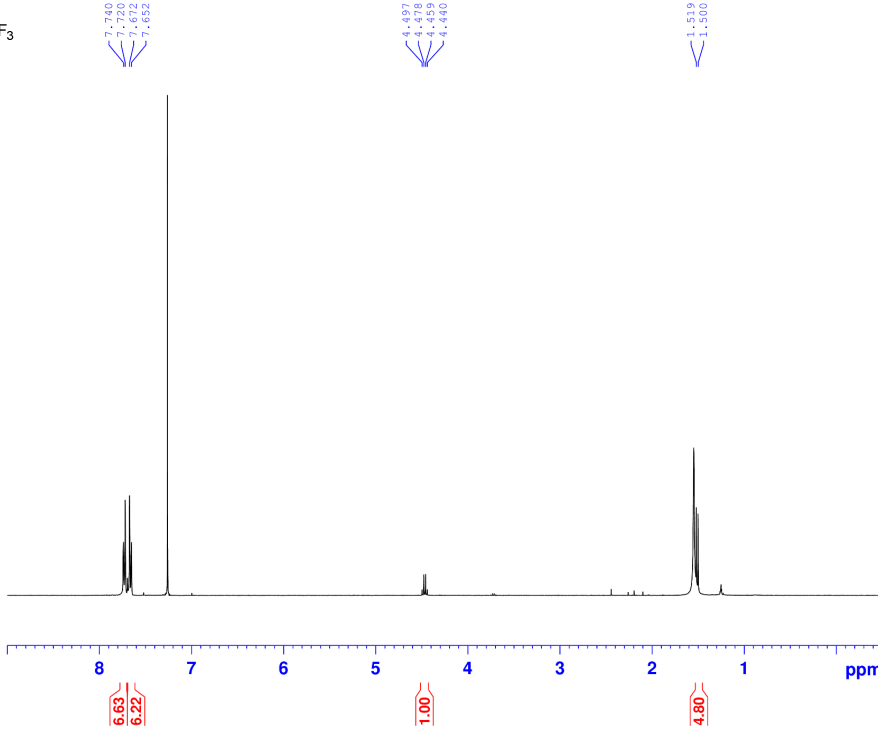

### IBB-nmr Analysis

```

NAME          NN248-054
EXPNO         3
PROCNO       1
Date_        20220610
Time         19.00
INSTRUM     av400
PROBHD      5 mm PABBO BB-
PULPROG     zg30
TD          65536
SOLVENT     CDCl3
NS          16
DS          2
SWH         8223.685 Hz
FIDRES      0.125483 Hz
AQ          3.9846387 sec
RG          203
DW          60.800 usec
DE          6.50 usec
TE          297.1 K
D1          1.0000000 sec
TD0         1

===== CHANNEL f1 =====
NUC1         1H
P1           14.00 usec
PL1          -1.80 dB
PL1W        14.82738590 W
SFO1        400.1324710 MHz
SI          32768
SF          400.1300096 MHz
WDW         EM
SSB         0
LB          0.30 Hz
GB          0
PC          1.00
  
```

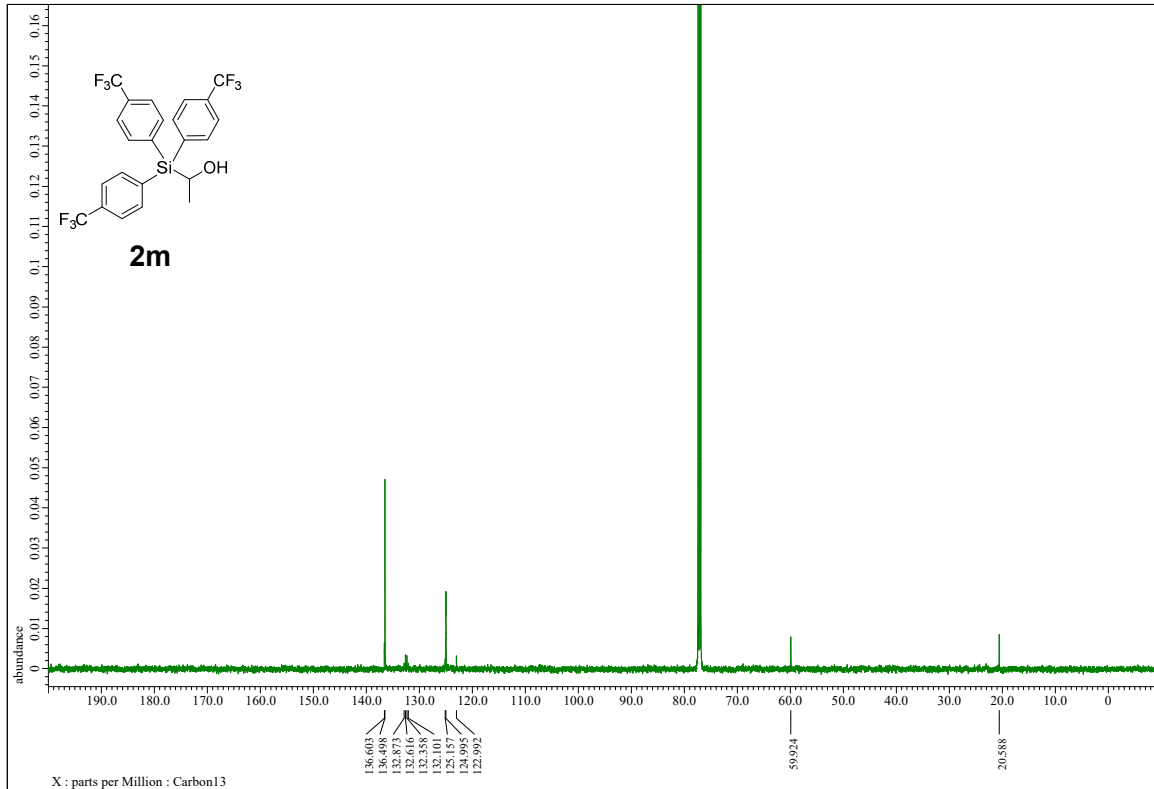


```

Filename      = 054-c016-10-recry_Carbon-
Author        = delta
Experiment    = carbon_jmp
Sample_id     = 054-c016-10-recry
Solvent       = CHLOROFORM-D
Actual_Start Time = 13-JUL-2022 17:35:08
Revision_Time = 20-FEB-2024 16:29:50

Comment      = single pulse decoupled ga
Data Format   = 1D COMPLEX
Dim_Size     = 26214
X_Domain    = Carbon
Dim_Title    = Carbon13
Dim_Units    = [ppm]
Dimensions   = X
Site         = JNM-ECA500
Spectrometer = DELTA2_NMR

Field_Strength = 11.7473579(T) (500[MHz])
X_Acq_Duration = 0.83361792(s)
X_Tomax       = 13C
X_Freq        = 125.76529768[MHz]
X_Offset      = 100[ppm]
X_Points      = 32768
X_Prescans    = 4
X_Resolution  = 1.15959034[Hz]
X_Sweep       = 39.3081761[kHz]
X_Sweep_Clipped = 31.44654088[kHz]
Irr_Domain    = Proton
Irr_Freq      = 500.15991521[MHz]
Irr_Offset    = 5.0[ppm]
Clipped       = TRUE
Scans         = 1024
Total_scans   = 1024

Relaxation_Delay = 2[s]
Recvc_gain      = 50
Temp_Set        = 22.1[dc]
X_90_Width     = 12.65[us]
X_Acq_Time     = 0.83361792[s]
X_Angle        = 90[deg]
X_Atn         = 7[db]
X_Pulse        = 4.2166667[us]
Irr_Atn_Dec    = 25.254[db]
Irr_Atn_Noise = 25.254[db]
Irr_Noise     = WALTZ16
Irr_Pwidth     = 92[us]
Decoupling     = TRUE
Initial_Wait   = 1[s]
Noe            = TRUE
Noe_Time       = 2[s]
Repetition_Time = 2.83361792[s]
  
```

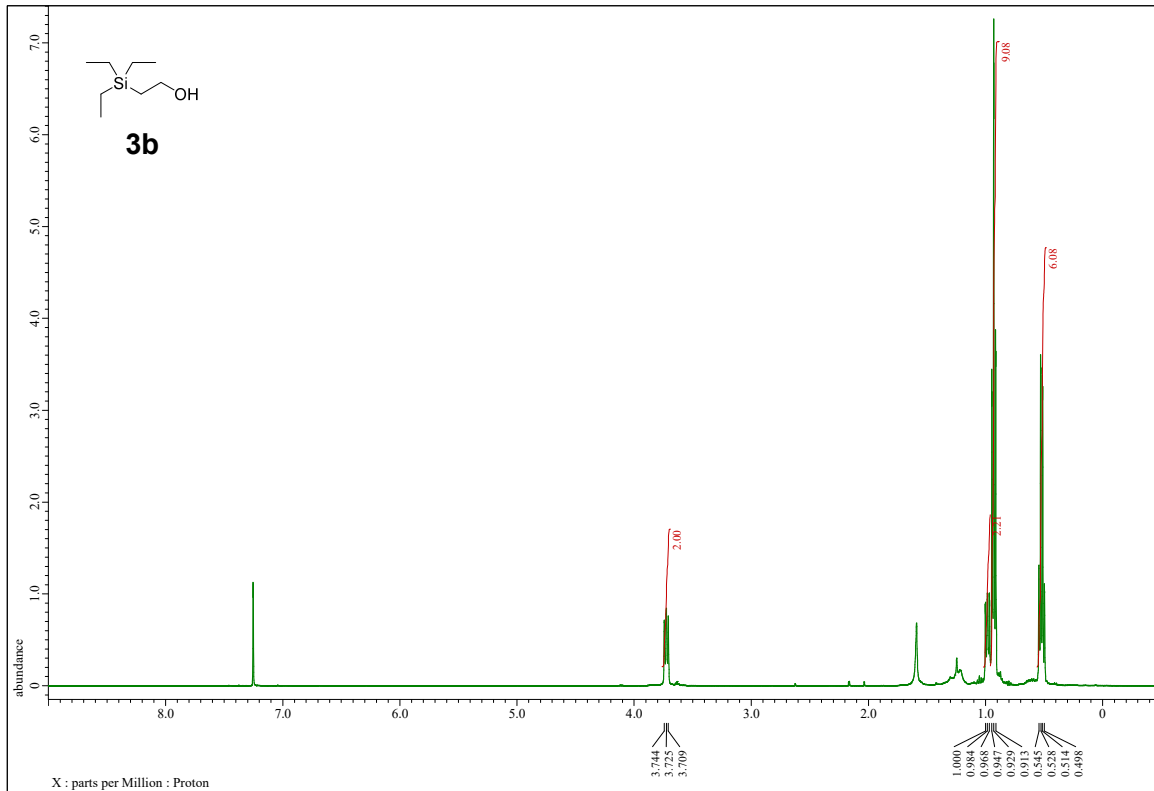

**JEOL**

|                   |                              |
|-------------------|------------------------------|
| Filename          | = 270-042-4_col120-22_dist_F |
| Author            | = delta                      |
| Experiment        | = proton_jmp                 |
| Sample_id         | = 270-042-4_col120-22_dist   |
| Solvent           | = CHLOROFORM-D               |
| Actual_Start_Time | = 11-SEP-2023 16:06:02       |
| Revision_Time     | = 20-SEP-2024 19:21:23       |
| Comment           | = single pulse               |
| Data_Format       | = 1D COMPLEX                 |
| Dim_Size          | = 13107                      |
| X_Domain          | = Proton                     |
| Dim_Title         | = Proton                     |
| Dim_Units         | = [ppm]                      |
| Dimensions        | = X                          |
| Site              | = JNM-ECA500                 |
| Spectrometer      | = DELTA2_NMR                 |
| Field_Strength    | = 11.7473579[T] (500[MHz])   |
| X_Acq_Duration    | = 1.74587904[s]              |
| X_Domain          | = 1H                         |
| X_Freq            | = 500.15991521[MHz]          |
| X_Offset          | = 5.0[ppm]                   |
| X_Points          | = 14384                      |
| X_Prescans        | = 1                          |
| X_Resolution      | = 0.57277737[Hz]             |
| X_Sweep           | = 9.38438438[kHz]            |
| X_Sweep_Clipped   | = 7.50750751[kHz]            |
| Irr_Domain        | = Proton                     |
| Irr_Freq          | = 500.15991521[MHz]          |
| Irr_Offset        | = 5.0[ppm]                   |
| Tri_Domain        | = Proton                     |
| Tri_Freq          | = 500.15991521[MHz]          |
| Tri_Offset        | = 5.0[ppm]                   |
| Clipped           | = FALSE                      |
| Scans             | = 16                         |
| Total_Scans       | = 16                         |
| Relaxation_Delay  | = 5[s]                       |
| Recv Gain         | = 48                         |
| Temp_Set          | = 22.4[dc]                   |
| X_90_Width        | = 6.7[us]                    |
| X_Acq_Time        | = 1.74587904[s]              |
| X_Angle           | = 45[deg]                    |
| X_Atn             | = 2.5[db]                    |
| X_Pulse           | = 3.35[us]                   |
| Irr_Mode          | = Off                        |
| Tri_Mode          | = Off                        |
| Daqts_Preset      | = FIDSE                      |
| Initial_Wait      | = 1[s]                       |
| Repetition_Time   | = 6.74587904[s]              |

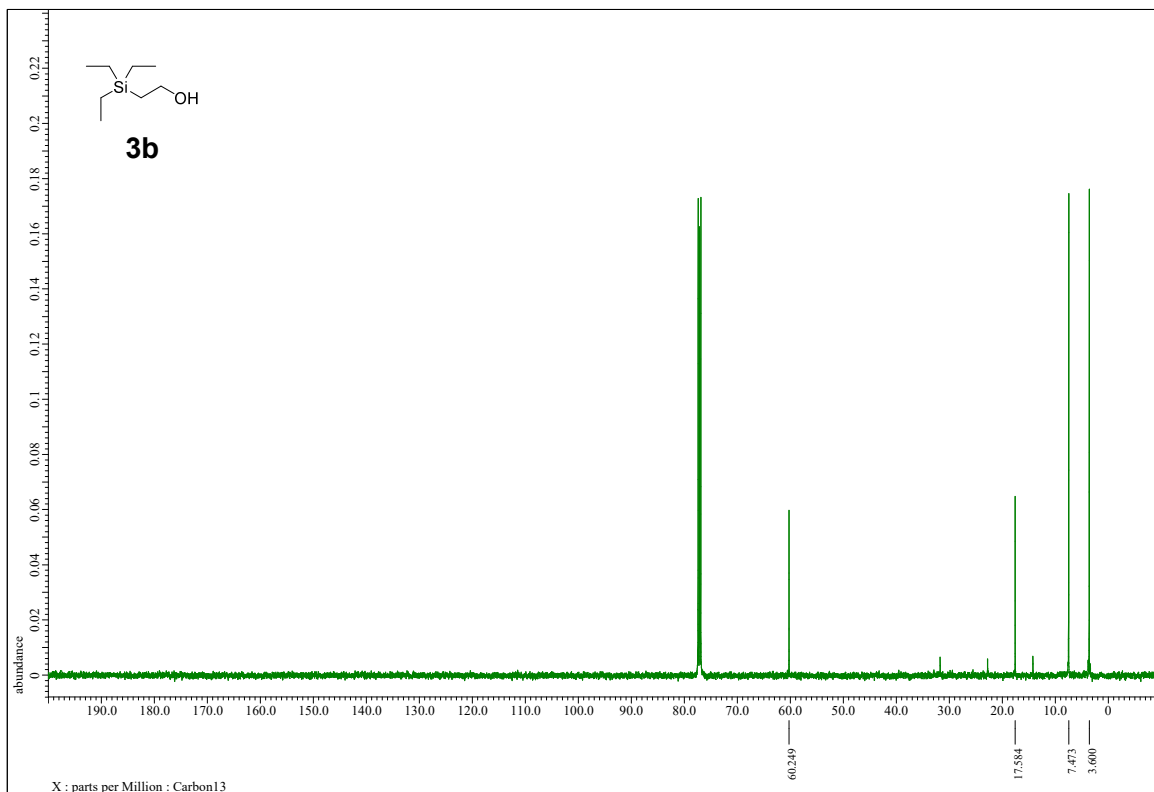

**JEOL**

|                   |                              |
|-------------------|------------------------------|
| Filename          | = 270-042-4_col120-23_dist_C |
| Author            | = delta                      |
| Experiment        | = carbon_jmp                 |
| Sample_id         | = 270-042-4_col120-23_dist   |
| Solvent           | = CHLOROFORM-D               |
| Actual_Start_Time | = 11-SEP-2023 17:27:56       |
| Revision_Time     | = 20-SEP-2024 19:18:55       |
| Comment           | = single pulse decoupled ga  |
| Data_Format       | = 1D COMPLEX                 |
| Dim_Size          | = 26214                      |
| X_Domain          | = Carbon                     |
| Dim_Title         | = Carbon13                   |
| Dim_Units         | = [ppm]                      |
| Dimensions        | = X                          |
| Site              | = JNM-ECA500                 |
| Spectrometer      | = DELTA2_NMR                 |
| Field_Strength    | = 11.7473579[T] (500[MHz])   |
| X_Acq_Duration    | = 0.83361792[s]              |
| X_Domain          | = 13C                        |
| X_Freq            | = 125.76529768[MHz]          |
| X_Offset          | = 100[ppm]                   |
| X_Points          | = 32768                      |
| X_Prescans        | = 4                          |
| X_Resolution      | = 1.19959034[Hz]             |
| X_Sweep           | = 39.3081761[kHz]            |
| X_Sweep_Clipped   | = 31.44654088[kHz]           |
| Irr_Domain        | = Proton                     |
| Irr_Freq          | = 500.15991521[MHz]          |
| Irr_Offset        | = 5.0[ppm]                   |
| Clipped           | = FALSE                      |
| Scans             | = 512                        |
| Total_Scans       | = 512                        |
| Relaxation_Delay  | = 2[s]                       |
| Recv Gain         | = 50                         |
| Temp_Set          | = 22.4[dc]                   |
| X_90_Width        | = 12.65[us]                  |
| X_Acq_Time        | = 0.83361792[s]              |
| X_Angle           | = 90[deg]                    |
| X_Atn             | = 7[db]                      |
| X_Pulse           | = 4.2166667[us]              |
| Irr_Atn_Dec       | = 25.254[db]                 |
| Irr_Atn_Noise     | = 25.254[db]                 |
| Irr_Noise         | = WALTZ                      |
| Irr_Pwidth        | = 92[us]                     |
| Decoupling        | = TRUE                       |
| Initial_Wait      | = 1[s]                       |
| Noe               | = TRUE                       |
| Noe_Time          | = 2[s]                       |
| Repetition_Time   | = 2.83361792[s]              |

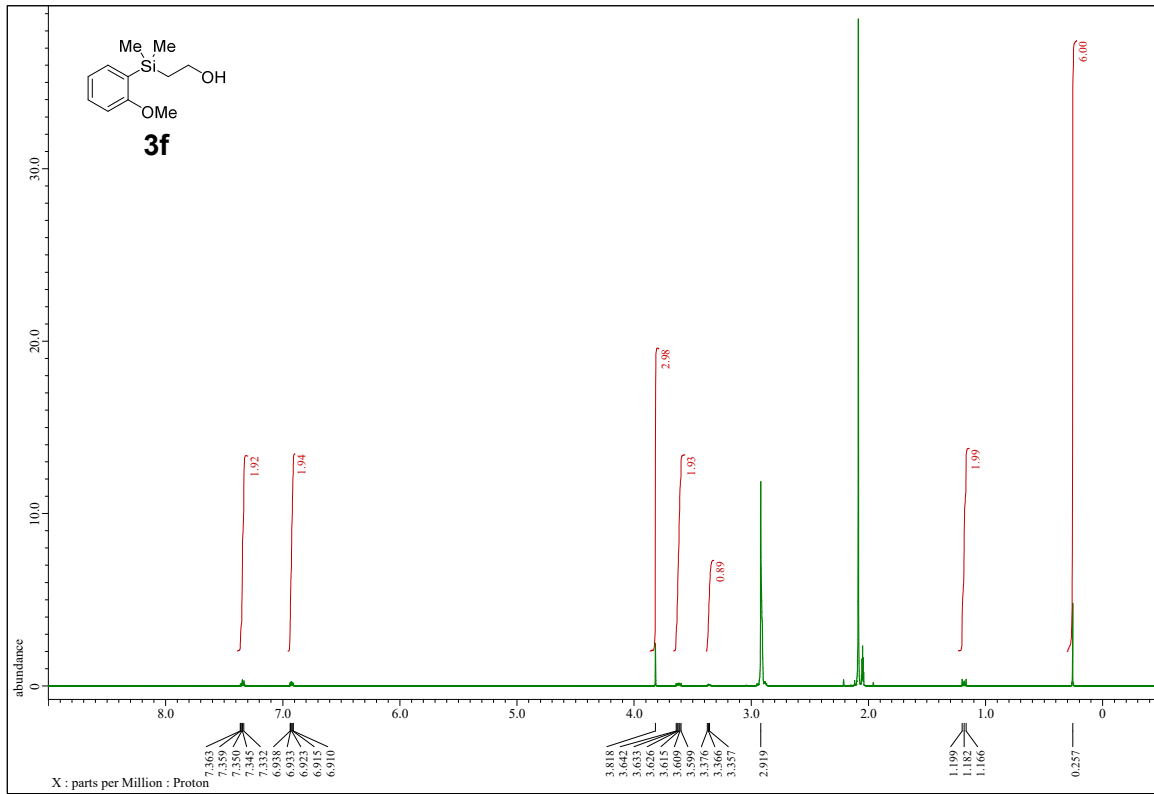

**JEOL**

```

Filename = 248-032_(o-OMe)Me2_2-OH_F
Author = delta
Experiment = proton_jmp
Sample_id = 248-032_(o-OMe)Me2_2-OH
Solvent = ACETONE-D6
Actual_Start_Time = 4-OCT-2023 15:23:14
Revision_Time = 20-FEB-2024 19:34:59

Comment = single pulse
Data_Format = 1D_COMPLEX
Dim_Size = 13107
X_Domain = Proton
Dim_Title = Proton
Dim_Units = [ppm]
Dimensions = X
Site = JNM-ECA500
Spectrometer = DELTA2_NMR

Field_Strength = 11.7473579[T] (500[MHz])
X_Acq_Duration = 1.74587904[s]
X_Domain = 18
X_Freq = 500.15991521[MHz]
X_Offset = 5.0[ppm]
X_Points = 16284
X_Prescans = 1
X_Resolution = 0.57277737[Hz]
X_Sweep = 9.3848438[kHz]
X_Sweep_Clipped = 7.50750751[kHz]
Irr_Domain = Proton
Irr_Freq = 500.15991521[MHz]
Irr_Offset = 5.0[ppm]
Tri_Domain = Proton
Tri_Freq = 500.15991521[MHz]
Tri_Offset = 5.0[ppm]
Clipped = FALSE
Scans = 8
Total_Scans = 8

Relaxation_Delay = 5[s]
Recv_gain = 48
Temp_Set = 22.4[dc]
X_90_Width = 6.7[us]
X_Acq_Time = 1.74587904[s]
X_Angle = 45[deg]
X_Atn = 2.5[db]
X_Pulse = 3.35[us]
Irr_Mode = Off
Tri_Mode = Off
Dnls_Presat = FALSE
Initial_Wait = 1[s]
Repetition_Time = 6.74587904[s]

```

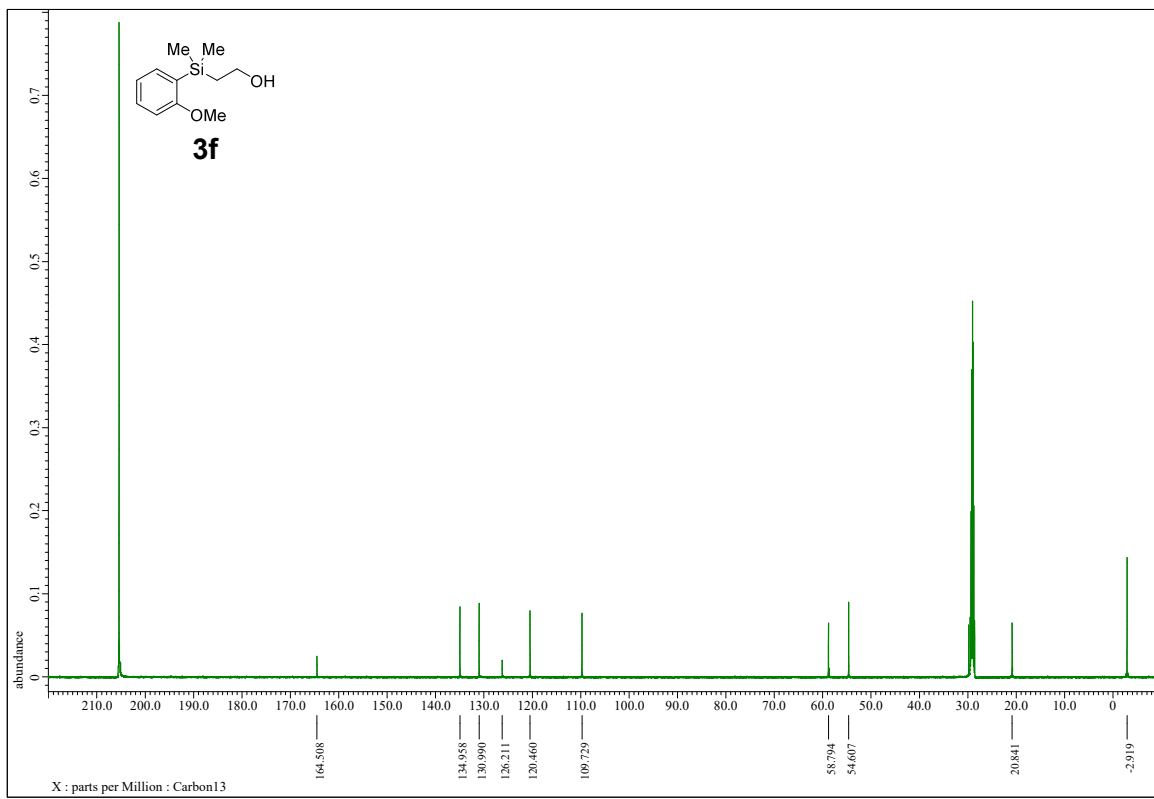

**JEOL**

```

Filename = 032-coi18-20-recol20-22_c
Author = delta
Experiment = carbon_jmp
Sample_id = 032-coi18-20-recol20-22
Solvent = ACETONE-D6
Actual_Start_Time = 13-JUL-2022 15:26:55
Revision_Time = 20-FEB-2024 18:19:59

Comment = single pulse decoupled ga
Data_Format = 1D_COMPLEX
Dim_Size = 26214
X_Domain = Carbon
Dim_Title = Carbon13
Dim_Units = [ppm]
Dimensions = X
Site = JNM-ECA500
Spectrometer = DELTA2_NMR

Field_Strength = 11.7473579[T] (500[MHz])
X_Acq_Duration = 0.83361792[s]
X_Domain = 13C
X_Freq = 125.76529768[MHz]
X_Offset = 100[ppm]
X_Points = 32768
X_Prescans = 4
X_Resolution = 1.19959034[Hz]
X_Sweep = 39.3081761[kHz]
X_Sweep_Clipped = 31.44654088[kHz]
Irr_Domain = Proton
Irr_Freq = 500.15991521[MHz]
Irr_Offset = 5.0[ppm]
Clipped = FALSE
Scans = 1024
Total_Scans = 1024

Relaxation_Delay = 2[s]
Recv_gain = 50
Temp_Set = 22[dc]
X_90_Width = 12.65[us]
X_Acq_Time = 0.83361792[s]
X_Angle = 90[deg]
X_Atn = 7[db]
X_Pulse = 4.2166667[us]
Irr_Atn_Dec = 25.254[db]
Irr_Atn_NoE = 25.254[db]
Irr_Noise = WALTZ
Irr_Pwidth = 92[us]
Decoupling = TRUE
Initial_Wait = 1[s]
Noe = TRUE
Noe_Time = 2[s]
Repetition_Time = 2.83361792[s]

```



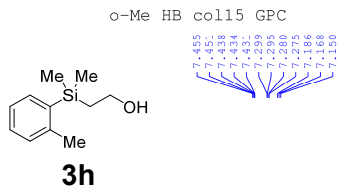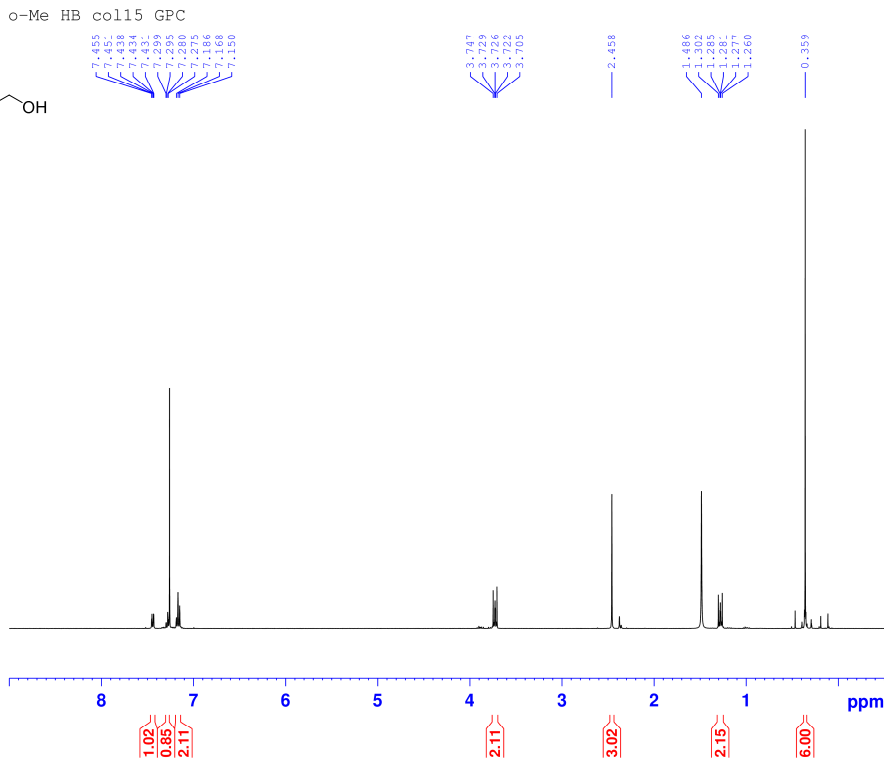

### IBB-nmr Analysis

```

NAME          NN248-046
EXPNO         4
PROCNO        1
Date_         20220517
Time          21.08
INSTRUM       av400
PROBHD        5 mm PABBO BB-
PULPROG       zg30
TD            65536
SOLVENT       CDCl3
NS            16
DS            2
SWH           8223.685 Hz
FIDRES        0.125483 Hz
AQ            3.9846387 sec
RG            203
DW            60.800 usec
DE            6.50 usec
TE            296.9 K
D1            1.0000000 sec
TD0           1

===== CHANNEL f1 =====
NUC1          1H
P1            14.00 usec
PL1           -1.80 dB
PL1W          14.82738590 W
SFO1          400.1324710 MHz
SI            32768
SF            400.1300096 MHz
WDW           EM
SSB           0
LB            0.30 Hz
GB            0
PC            1.00
  
```

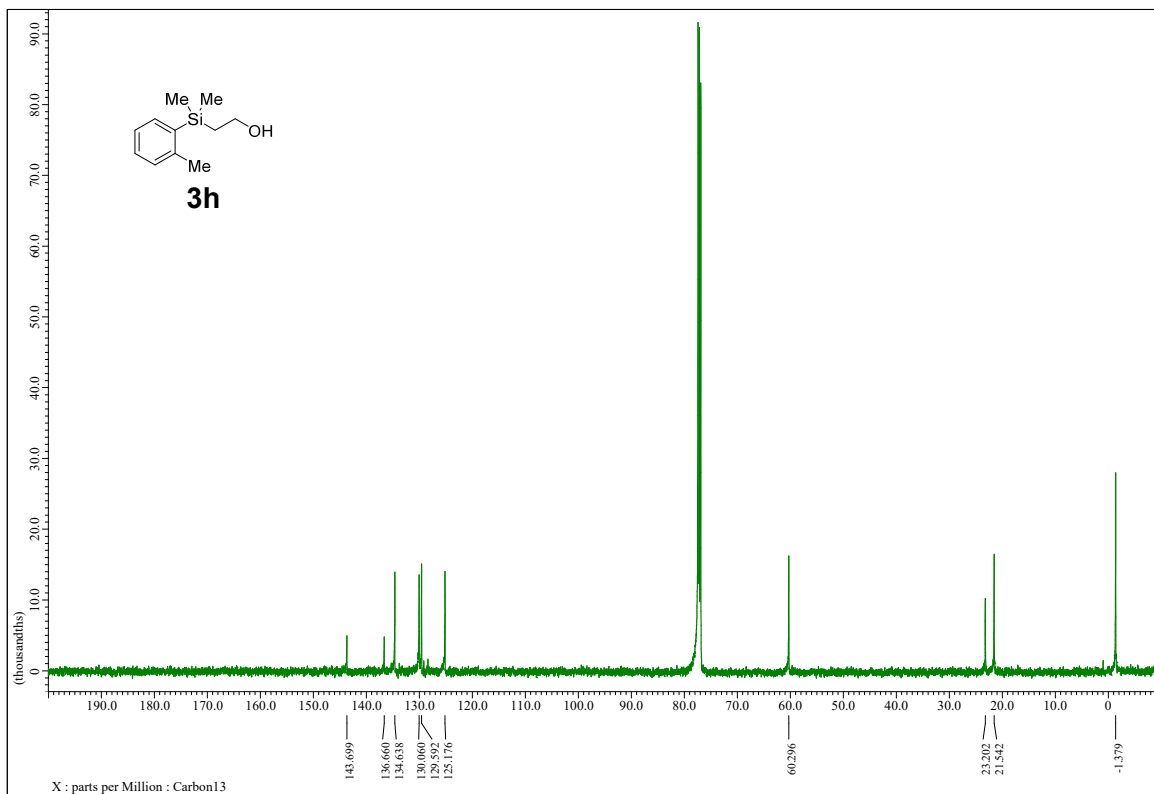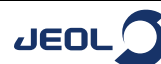

```

Filename      = 045-coll15-GPC_Carbon-1-3.
Author        = delta
Experiment    = carbon_jmp
Sample_id     = 045-coll15-GPC
Solvent       = CHLOROFORM-D
Actual_Start Time = 21-MAR-2022 19:20:43
Revision_Time = 20-FEB-2024 18:31:30

Comment       = single pulse decoupled ga
Data Format    = 1D COMPLEX
Dim_Size      = 26214
X_Domain     = Carbon
Dim_Title     = Carbon13
Dim_Units    = [ppm]
Dimensions    = X
Site          = JNM-ECA500
Spectrometer  = DELTA2_NMR

Field_Strength = 11.7473579 [T] (500 [MHz])
Acq_Duration   = 0.83361792 [s]
X_Tomax        = 13C
X_Freq         = 125.76529768 [MHz]
X_Offset       = 100 [ppm]
X_Points       = 32768
X_Prescans     = 4
X_Resolution   = 1.19959034 [Hz]
X_Sweep        = 39.3081761 [kHz]
X_Sweep_Clipped = 31.44654088 [kHz]
Irr_Domain     = Proton
Irr_Freq       = 500.15991521 [MHz]
Irr_Offset     = 5.0 [ppm]
Clipped        = TRUE
Scans          = 2048
Total_scans    = 2048

Relaxation_Delay = 2 [s]
Recvc_gain      = 50
Temp_Set        = 22.7 [dC]
X_90_Width     = 12.65 [us]
X_Acq_Time     = 0.83361792 [s]
X_Angle        = 90 [deg]
X_Attn         = 7 [dB]
X_Pulse        = 4.2166667 [us]
Irr_Atn_Dec    = 25.254 [dB]
Irr_Atn_Noise = 25.254 [dB]
Irr_Noise      = WALTZ16
Irr_Width      = 92 [us]
Decoupling     = TRUE
Initial_Wait   = 1 [s]
Noe            = TRUE
Noe_Time       = 2 [s]
Repetition_Time = 2.83361792 [s]
  
```

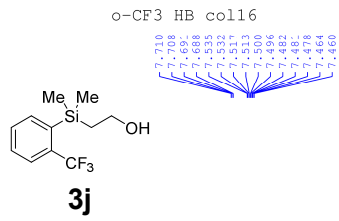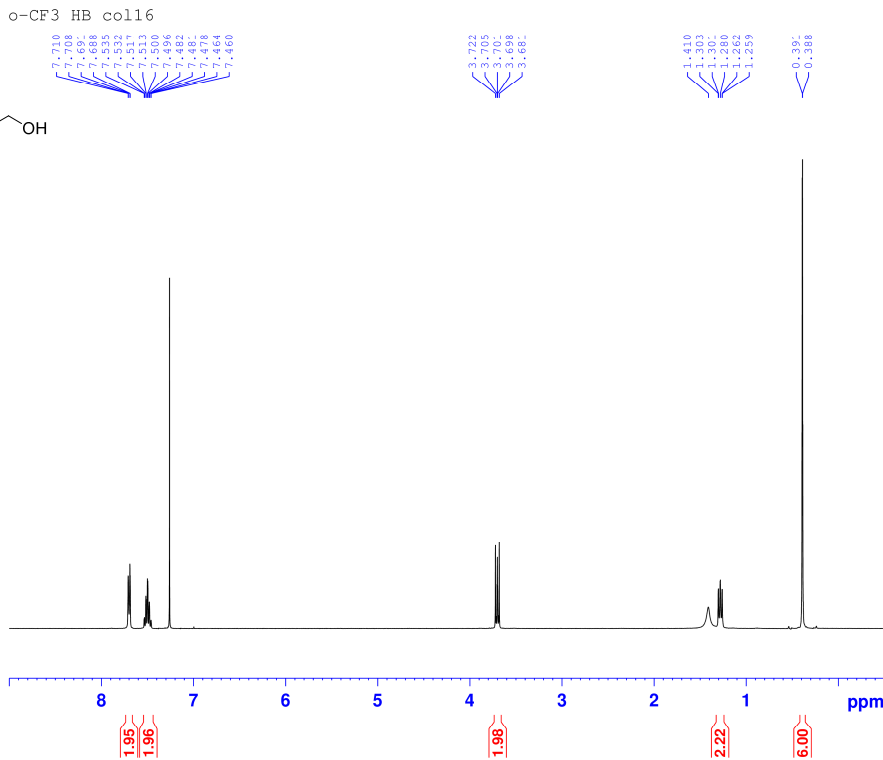

## IBB-nmr Analysis

```

NAME          NN248-049
EXPNO         4
PROCNO        1
Date_         20220601
Time          22.25
INSTRUM       av400
PROBHD        5 mm PABBO BB-
PULPROG       zg30
TD            65536
SOLVENT       CDCl3
NS            16
DS            2
SWH           8223.685 Hz
FIDRES        0.125483 Hz
AQ            3.9846387 sec
RG            203
DW            60.800 usec
DE            6.50 usec
TE            297.1 K
D1            1.0000000 sec
TDO           1
===== CHANNEL f1 =====
NUC1          1H
P1            14.00 usec
PL1           -1.80 dB
PL1W         14.82738590 W
SFO1         400.1324710 MHz
SI            32768
SF            400.1300096 MHz
WDW           EM
SSB           0
LB            0.30 Hz
GB            0
PC            1.00
  
```

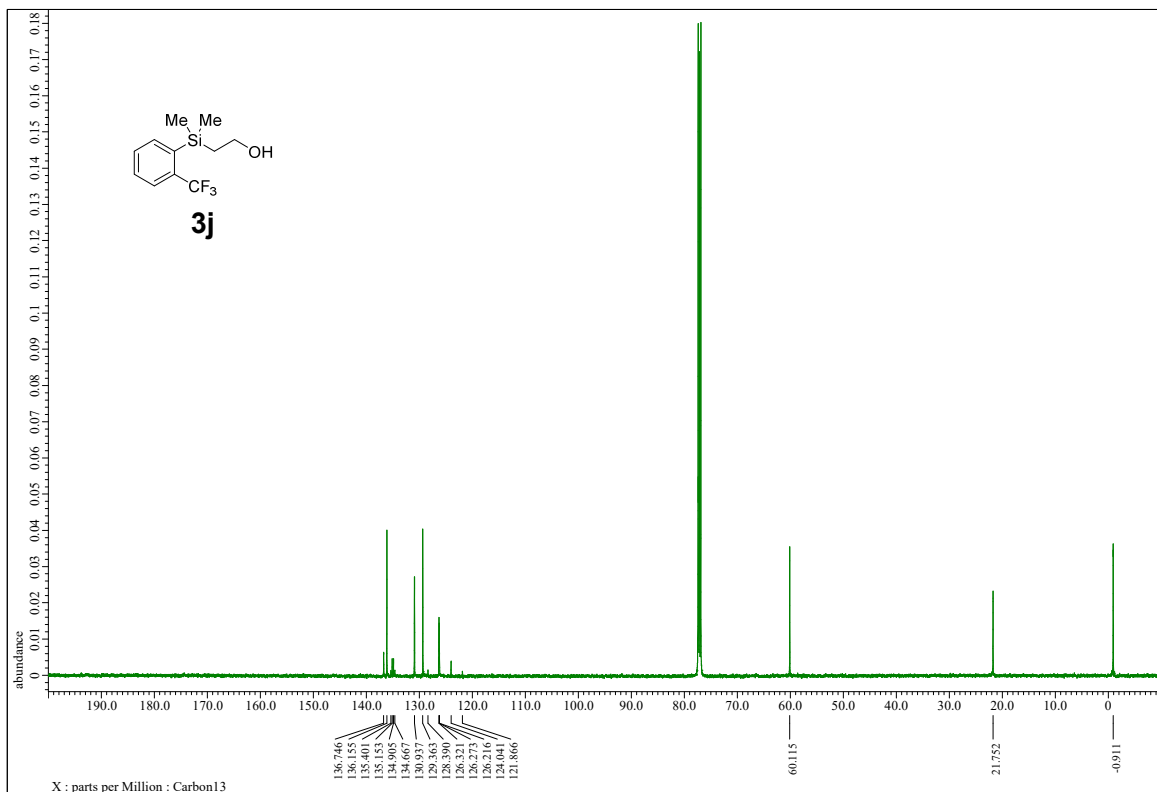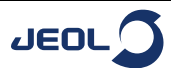

```

Filename      = 049-coll16_Carbon-2-2.jdf
Author        = delta
Experiment    = carbon.jxp
Sample_id     = 049-coll16
Solvent       = CHLOROFORM-D
Actual_StartTime = 20-PUL-2022 02:10:24
Revision_time = 20-PUL-2024 18:26:57

Comment       = single pulse decoupled ga
Data Format    = 1D COMPLEX
Dim_Size      = 26214
X_Domain     = Carbon
Dim_Title     = Carbon13
Dim_Units     = (ppm)
Dimensions    = X
Site          = JNM-ECA500
Spectrometer  = DELTA2_NMR

Field_Strength = 11.7473579 (T) (500[MHz])
X_Acq_Duration = 0.83361792 (s)
X_Points      = 133
X_Freq        = 125.76529768 (MHz)
X_Offset      = 100 (ppm)
X_Scans       = 32768
X_Resolution  = 1.15959034 (Hz)
X_Sweep       = 39.3081761 (kHz)
X_Sweep_Clipped = 31.44654088 (kHz)
Irr_Domain    = Proton
Irr_Freq      = 500.15991521 (MHz)
Irr_Offset    = 5.0 (ppm)
Clipped       = FALSE
Scans         = 4096
Total_scans   = 4096

Relaxation_Delay = 2 (s)
Recvc_gain      = 50
Temp_Set        = 22.2 (dc)
X_90_Width     = 12.65 (us)
X_Acq_time     = 0.83361792 (s)
X_Angle        = 90 (deg)
X_Atn          = 7 (db)
X_Pulse        = 4.2166667 (us)
Irr_Atn_Dec    = 25.254 (db)
Irr_Atn_Noise = 25.254 (db)
Irr_Noise     = 1 (s)
Irr_Width      = 92 (us)
Decoupling     = TRUE
Initial_Wait   = 1 (s)
Noe            = TRUE
Noe_Time       = 2 (s)
Repetition_Time = 2.83361792 (s)
  
```

# IBB-nmr Analysis

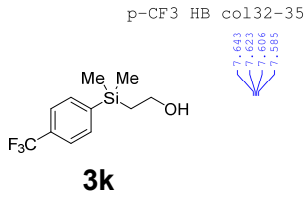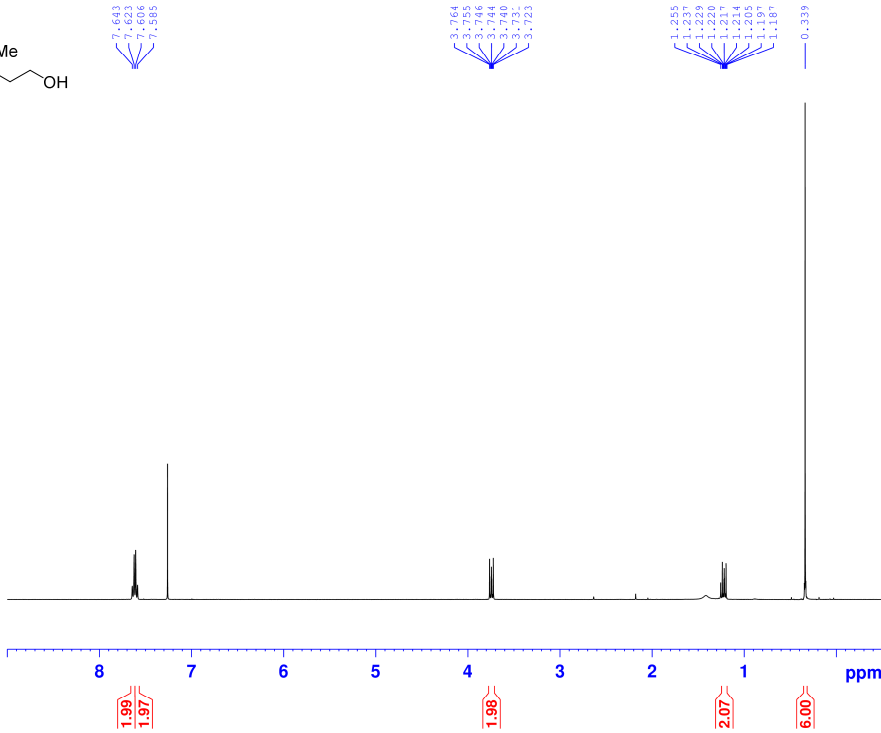

```

NAME          NN248-030
EXPNO         3
PROCNO        1
Date_         20220329
Time          23.25
INSTRUM       av400
PROBHD        5 mm PABBO BB-
PULPROG       zg30
TD            65536
SOLVENT       CDCl3
NS            16
DS            2
SWH           8223.685 Hz
FIDRES        0.125483 Hz
AQ            3.9846387 sec
RG            203
DW            60.800 usec
DE            6.50 usec
TE            296.0 K
D1            1.0000000 sec
TD0           1

===== CHANNEL f1 =====
NUC1          1H
P1            14.00 usec
PL1           -1.80 dB
PL1W         14.82738590 W
SFO1          400.1324710 MHz
SI            32768
SF            400.1300096 MHz
WDW           EM
SSB           0
LB            0.30 Hz
GB            0
PC            1.00
    
```

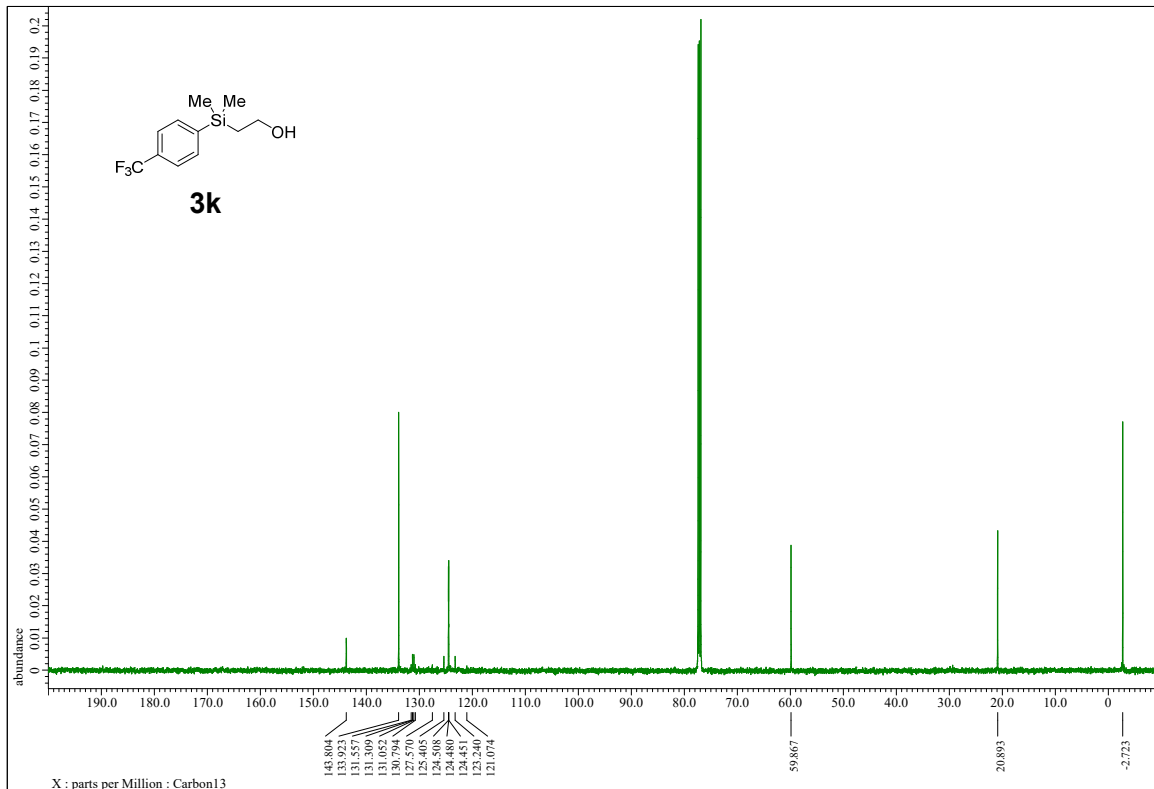

```

Filename      = 030-col13235_Carbon-1-2.jd
Author        = delta
Experiment    = carbon.jxp
Sample id     = 030-col13235
Solvent       = CHLOROFORM-D
Actual_Start Time = 30-MAR-2022 16:09:19
Revision_Time = 20-FEB-2024 18:01:21

Comment      = single pulse decoupled ga
Data Format   = 1D COMPLEX
Dim_Size     = 26214
X_Domain    = Carbon
Dim_Title    = Carbon13
Dim_Units    = [ppm]
Dimensions   = X
Site         = JNM-ECA500
Spectrometer = DELTA2_NMR

Field_Strength = 11.7473579 [T] (500 [MHz])
X_Acq_Duration = 0.83361792 [s]
X_Points       = 13C
X_Freq         = 125.76529768 [MHz]
X_Offset       = 100 [ppm]
X_Points       = 32768
X_Prescans     = 4
X_Resolution   = 1.19959034 [Hz]
X_Sweep        = 39.3081761 [kHz]
X_Sweep_Clipped = 31.44654088 [kHz]
Irr_Domain     = Proton
Irr_Freq       = 500.15991521 [MHz]
Irr_Offset     = 5.0 [ppm]
Clipped        = FALSE
Scans          = 1024
Total_scans    = 1024

Relaxation_Delay = 2 [s]
Recvr_gain       = 50
Temp_Set         = 21 [C]
X_90_Width      = 12.65 [us]
X_Acq_Time      = 0.83361792 [s]
X_Angle         = 90 [deg]
X_Attn          = 7 [dB]
X_Pulse         = 4.2166667 [us]
Irr_Atn_Dec     = 25.25 [dB]
Irr_Atn_Noise  = 25.25 [dB]
Irr_Noise       = WALTZ
Irr_Width       = 92 [us]
Decoupling      = TRUE
Initial_Wait    = 1 [s]
Noe              = TRUE
Noe_Time        = 2 [s]
Repetition_Time = 2.83361792 [s]
    
```

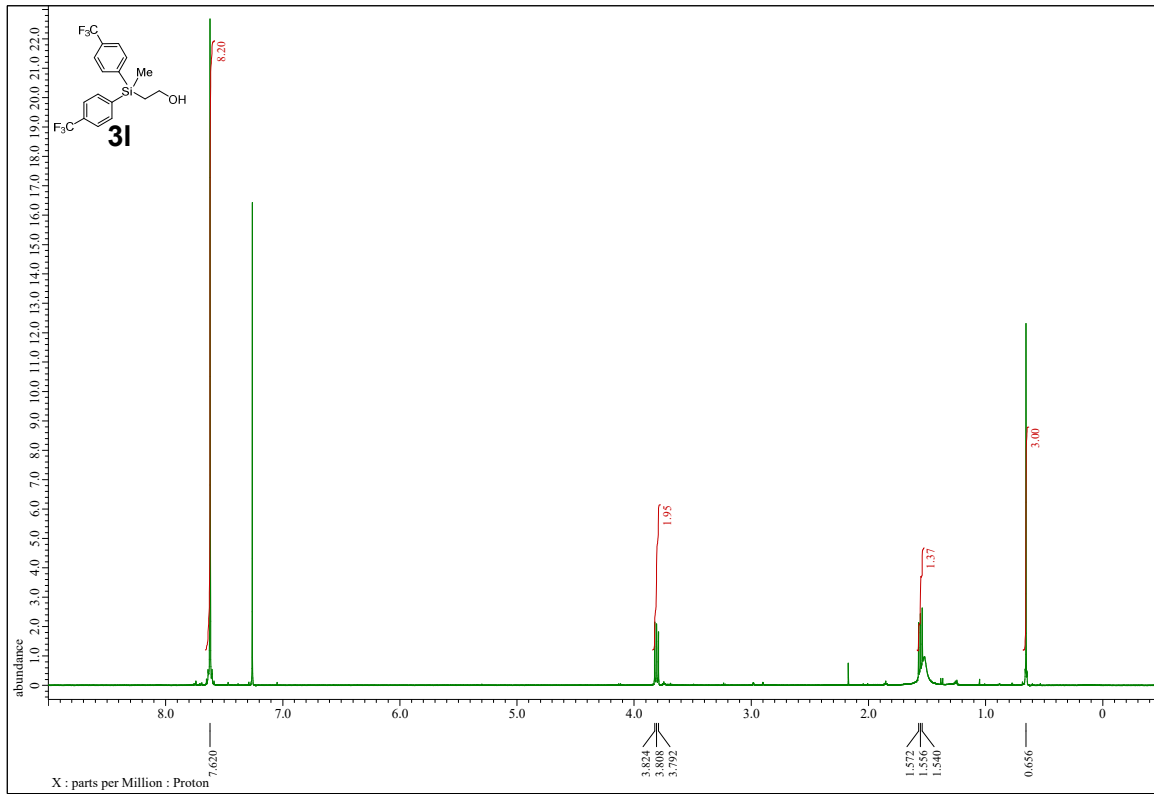

**JEOL**

|                   |                             |
|-------------------|-----------------------------|
| Filename          | = 248-066_(p-CF3)2Me_2-OH_F |
| Author            | = delta                     |
| Experiment        | = proton_jmp                |
| Sample_id         | = 248-066_(p-CF3)2Me_2-OH   |
| Solvent           | = CHLOROFORM-D              |
| Actual_Start_Time | = 4-OCT-2023 15:14:04       |
| Revision_Time     | = 20-FEB-2024 18:34:35      |
| Comment           | = single pulse              |
| Data_Format       | = 1D COMPLEX                |
| Dim_Size          | = 13107                     |
| X_Domain          | = Proton                    |
| Dim_Title         | = Proton                    |
| Dim_Units         | = [ppm]                     |
| Dimensions        | = X                         |
| Site              | = JNM-ECA500                |
| Spectrometer      | = DELTA2_NMR                |
| Field_Strength    | = 11.7473579[T] (500[MHz])  |
| X_Acq_Duration    | = 1.74587904[s]             |
| X_Domain          | = 1H                        |
| X_Freq            | = 500.15991521[MHz]         |
| X_Offset          | = 5.0[ppm]                  |
| X_Points          | = 14284                     |
| X_Prescans        | = 1                         |
| X_Resolution      | = 0.5727737[Hz]             |
| X_Sweep           | = 9.38438438[kHz]           |
| X_Sweep_Clipped   | = 7.50750751[kHz]           |
| Irr_Domain        | = Proton                    |
| Irr_Freq          | = 500.15991521[MHz]         |
| Irr_Offset        | = 5.0[ppm]                  |
| Tri_Domain        | = Proton                    |
| Tri_Freq          | = 500.15991521[MHz]         |
| Tri_Offset        | = 5.0[ppm]                  |
| Clipped           | = FALSE                     |
| Scans             | = 8                         |
| Total_Scans       | = 8                         |
| Relaxation_Delay  | = 5[s]                      |
| Recv_gain         | = 60                        |
| Temp_Set          | = 22.4[dc]                  |
| X_90_Width        | = 6.7[us]                   |
| X_Acq_Time        | = 1.74587904[s]             |
| X_Angle           | = 45[deg]                   |
| X_Atn             | = 2.5[db]                   |
| X_Pulse           | = 3.35[us]                  |
| Irr_Mode          | = Off                       |
| Tri_Mode          | = Off                       |
| Dnfs_Preset       | = FALSE                     |
| Initial_Wait      | = 1[s]                      |
| Repetition_Time   | = 6.74587904[s]             |

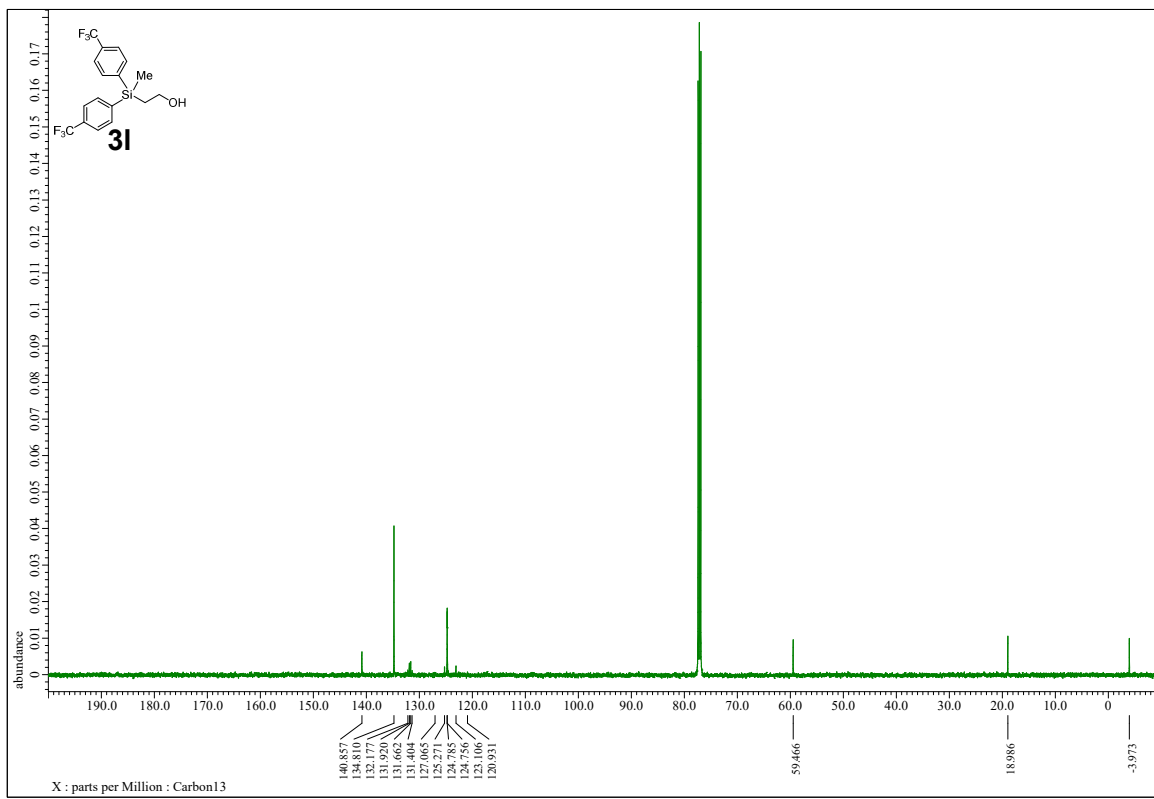

**JEOL**

|                   |                             |
|-------------------|-----------------------------|
| Filename          | = 248-066_(p-CF3)2Me_2-OH_C |
| Author            | = delta                     |
| Experiment        | = carbon_jmp                |
| Sample_id         | = 248-066_(p-CF3)2Me_2-OH   |
| Solvent           | = CHLOROFORM-D              |
| Actual_Start_Time | = 5-OCT-2023 11:51:38       |
| Revision_Time     | = 20-FEB-2024 18:37:38      |
| Comment           | = single pulse decoupled ga |
| Data_Format       | = 1D COMPLEX                |
| Dim_Size          | = 26214                     |
| X_Domain          | = Carbon                    |
| Dim_Title         | = Carbon13                  |
| Dim_Units         | = [ppm]                     |
| Dimensions        | = X                         |
| Site              | = JNM-ECA500                |
| Spectrometer      | = DELTA2_NMR                |
| Field_Strength    | = 11.7473579[T] (500[MHz])  |
| X_Acq_Duration    | = 0.83361792[s]             |
| X_Domain          | = 13C                       |
| X_Freq            | = 125.76529768[MHz]         |
| X_Offset          | = 100[ppm]                  |
| X_Points          | = 32768                     |
| X_Prescans        | = 4                         |
| X_Resolution      | = 1.19959034[Hz]            |
| X_Sweep           | = 39.3081761[kHz]           |
| X_Sweep_Clipped   | = 31.44654088[kHz]          |
| Irr_Domain        | = Proton                    |
| Irr_Freq          | = 500.15991521[MHz]         |
| Irr_Offset        | = 5.0[ppm]                  |
| Clipped           | = FALSE                     |
| Scans             | = 2048                      |
| Total_Scans       | = 2048                      |
| Relaxation_Delay  | = 2[s]                      |
| Recv_gain         | = 50                        |
| Temp_Set          | = 22.3[dc]                  |
| X_90_Width        | = 12.65[us]                 |
| X_Acq_Time        | = 0.83361792[s]             |
| X_Angle           | = 90[deg]                   |
| X_Atn             | = 7[db]                     |
| X_Pulse           | = 4.2166667[us]             |
| Irr_Atn_Dec       | = 25.254[db]                |
| Irr_Atn_No        | = 25.254[db]                |
| Irr_Noise         | = WALTZ                     |
| Irr_Pwidth        | = 92[us]                    |
| Decoupling        | = TRUE                      |
| Initial_Wait      | = 1[s]                      |
| Noe               | = TRUE                      |
| Noe_Time          | = 2[s]                      |
| Repetition_Time   | = 2.83361792[s]             |

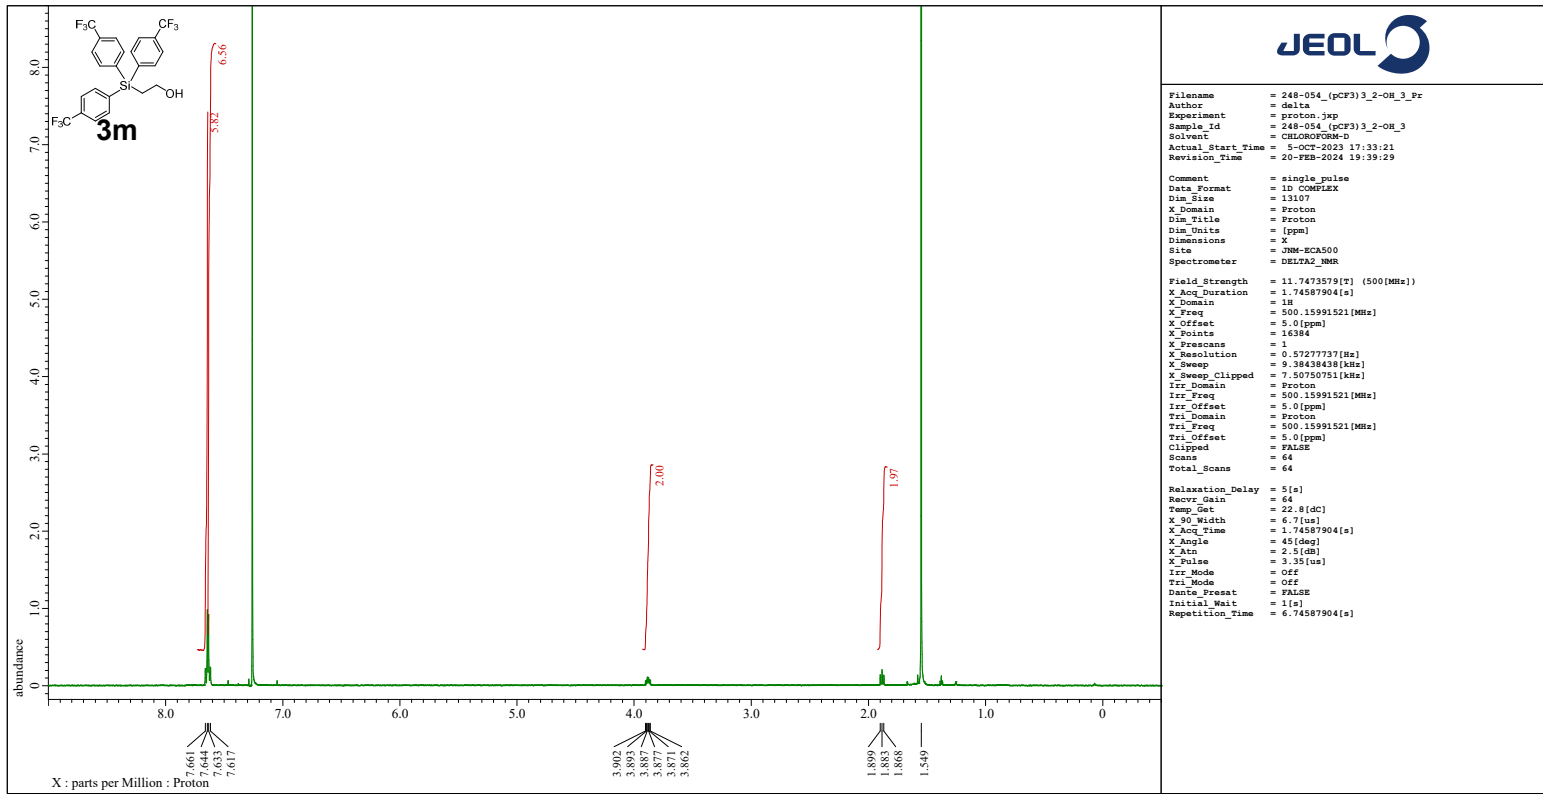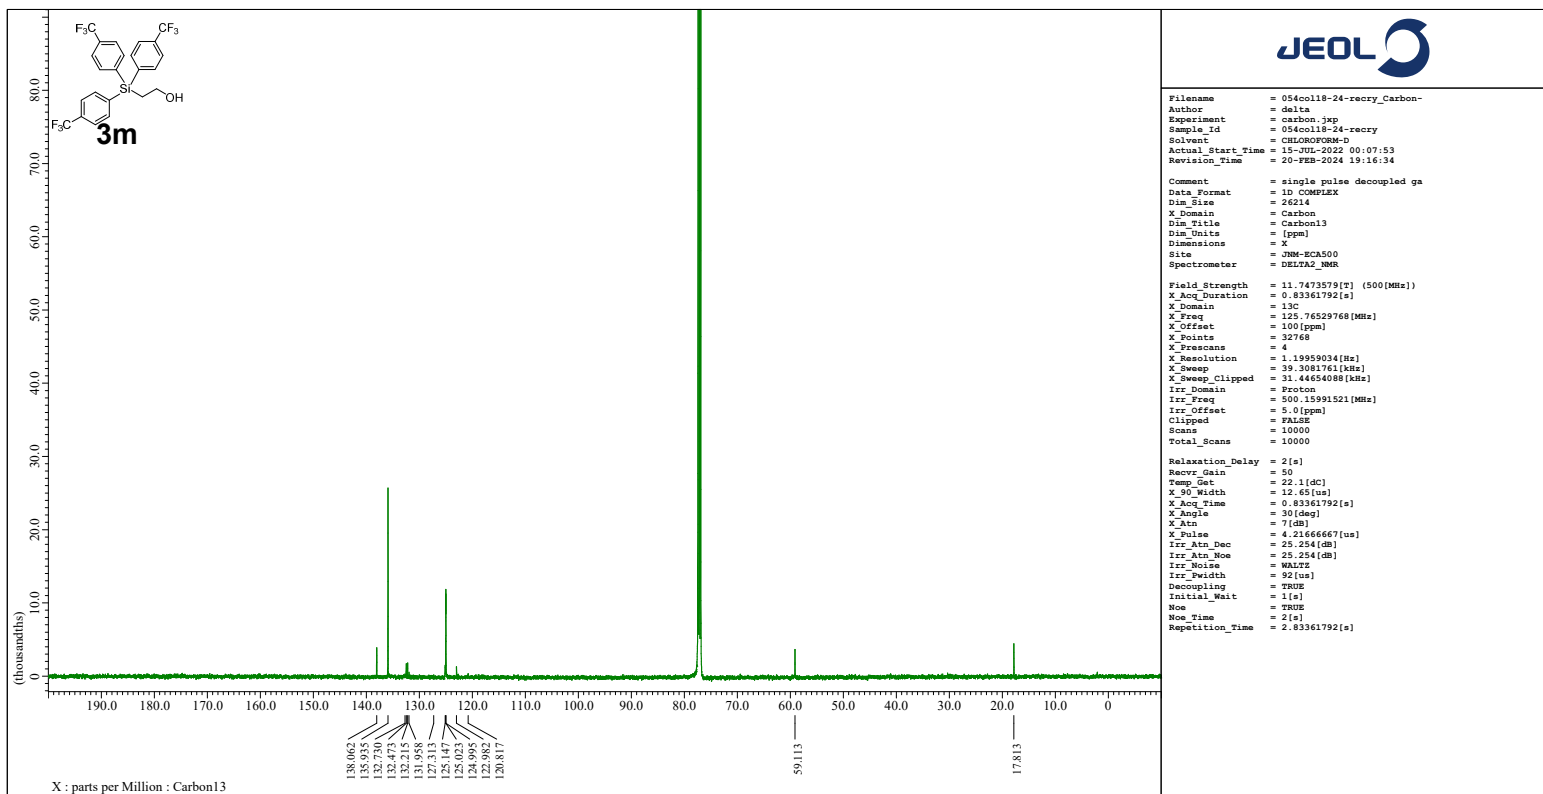

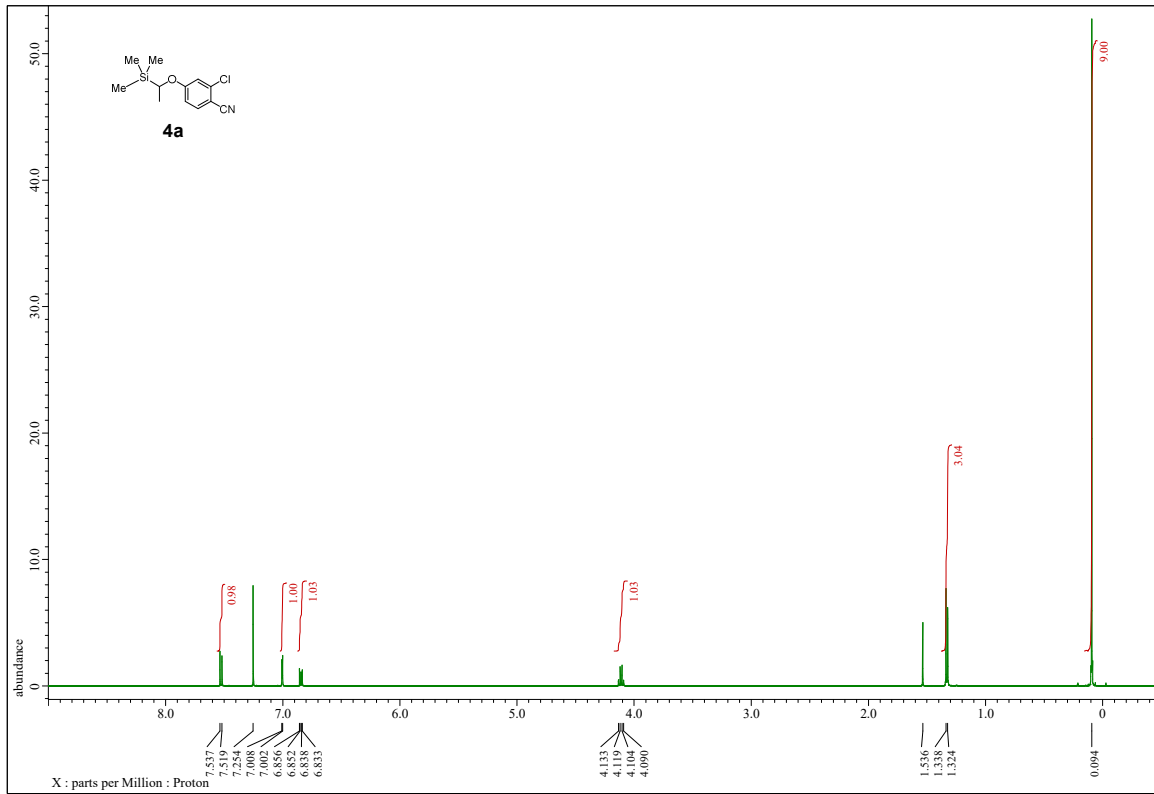

**JEOL**

|                   |                              |
|-------------------|------------------------------|
| Filename          | = NAN43-2.jdf                |
| Author            | = delta                      |
| Experiment        | = proton.jxp                 |
| Sample id         | = 270-021-3 OPC225-234       |
| Solvent           | = CHLOROFORM-D               |
| Actual_Start_Time | = 13-JUL-2023 19:22:06       |
| Revision_Time     | = 20-FEB-2024 11:57:37       |
| Comment           | = single pulse               |
| Data Format       | = 1D COMPLEX                 |
| Dim_Size          | = 13107                      |
| X_Domain          | = Proton                     |
| Dim_Title         | = Proton                     |
| Dim_Units         | = [ppm]                      |
| Dimensions        | = X                          |
| Site              | = JNM-ECA500                 |
| Spectrometer      | = DELTA2_NMR                 |
| Field_Strength    | = 11.7473579 [T] (500 [MHz]) |
| X_Acq_Duration    | = 1.74587904 [s]             |
| X_Domain          | = 18                         |
| X_Freq            | = 500.15991521 [MHz]         |
| X_Offset          | = 5.0 [ppm]                  |
| X_Points          | = 14286                      |
| X_Prescans        | = 1                          |
| X_Resolution      | = 0.57277737 [Hz]            |
| X_Sweep           | = 9.3848438 [kHz]            |
| X_Sweep_Clipped   | = 7.50750751 [kHz]           |
| Irr_Domain        | = Proton                     |
| Irr_Freq          | = 500.15991521 [MHz]         |
| Irr_Offset        | = 5.0 [ppm]                  |
| Tri_Domain        | = Proton                     |
| Tri_Freq          | = 500.15991521 [MHz]         |
| Tri_Offset        | = 5.0 [ppm]                  |
| Clipped           | = FALSE                      |
| Scans             | = 16                         |
| Total_Scans       | = 16                         |
| Relaxation_Delay  | = 5 [s]                      |
| Recvr_Gain        | = 58                         |
| Temp_Set          | = 22.7 [dC]                  |
| X_90_Width        | = 6.7 [us]                   |
| X_Acq_Time        | = 1.74587904 [s]             |
| X_Angle           | = 45 [deg]                   |
| X_Atn             | = 2.5 [dB]                   |
| X_Pulse           | = 3.35 [us]                  |
| Irr_Mode          | = Off                        |
| Tri_Mode          | = Off                        |
| Delta_Preset      | = FALSE                      |
| Initial_Wait      | = 1 [s]                      |
| Repetition_Time   | = 6.74587904 [s]             |

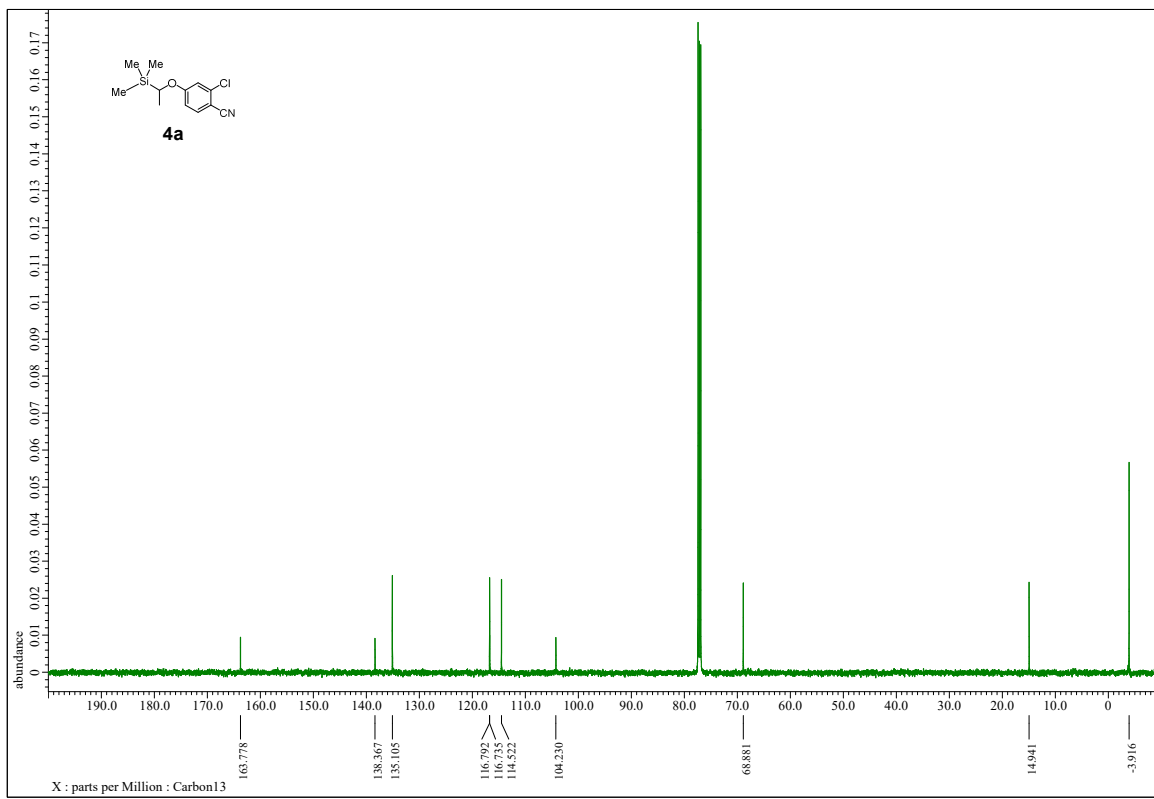

**JEOL**

|                   |                              |
|-------------------|------------------------------|
| Filename          | = NAN043 Carbon-1-4.jdf      |
| Author            | = delta                      |
| Experiment        | = carbon.jxp                 |
| Sample id         | = NAN043                     |
| Solvent           | = CHLOROFORM-D               |
| Actual_Start_Time | = 11-NOV-2023 22:39:35       |
| Revision_Time     | = 20-FEB-2024 11:58:59       |
| Comment           | = single pulse decoupled ga  |
| Data Format       | = 1D COMPLEX                 |
| Dim_Size          | = 26214                      |
| X_Domain          | = Carbon                     |
| Dim_Title         | = Carbon13                   |
| Dim_Units         | = [ppm]                      |
| Dimensions        | = X                          |
| Site              | = JNM-ECA500                 |
| Spectrometer      | = DELTA2_NMR                 |
| Field_Strength    | = 11.7473579 [T] (500 [MHz]) |
| X_Acq_Duration    | = 0.83361792 [s]             |
| X_Domain          | = 13C                        |
| X_Freq            | = 125.76529768 [MHz]         |
| X_Offset          | = 100 [ppm]                  |
| X_Points          | = 32768                      |
| X_Prescans        | = 4                          |
| X_Resolution      | = 1.19959034 [Hz]            |
| X_Sweep           | = 39.3081761 [kHz]           |
| X_Sweep_Clipped   | = 31.44654088 [kHz]          |
| Irr_Domain        | = Proton                     |
| Irr_Freq          | = 500.15991521 [MHz]         |
| Irr_Offset        | = 5.0 [ppm]                  |
| Clipped           | = FALSE                      |
| Scans             | = 1024                       |
| Total_Scans       | = 1024                       |
| Relaxation_Delay  | = 2 [s]                      |
| Recvr_Gain        | = 50                         |
| Temp_Set          | = 22.8 [dC]                  |
| X_90_Width        | = 12.65 [us]                 |
| X_Acq_Time        | = 0.83361792 [s]             |
| X_Angle           | = 90 [deg]                   |
| X_Atn             | = 7 [dB]                     |
| X_Pulse           | = 4.2166667 [us]             |
| Irr_Atn_Dec       | = 25.254 [dB]                |
| Irr_Atn_Noise     | = 25.254 [dB]                |
| Irr_Noise         | = WALTZ                      |
| Irr_Width         | = 92 [us]                    |
| Decoupling        | = TRUE                       |
| Initial_Wait      | = 1 [s]                      |
| Noe               | = TRUE                       |
| Noe_Time          | = 2 [s]                      |
| Repetition_Time   | = 2.83361792 [s]             |

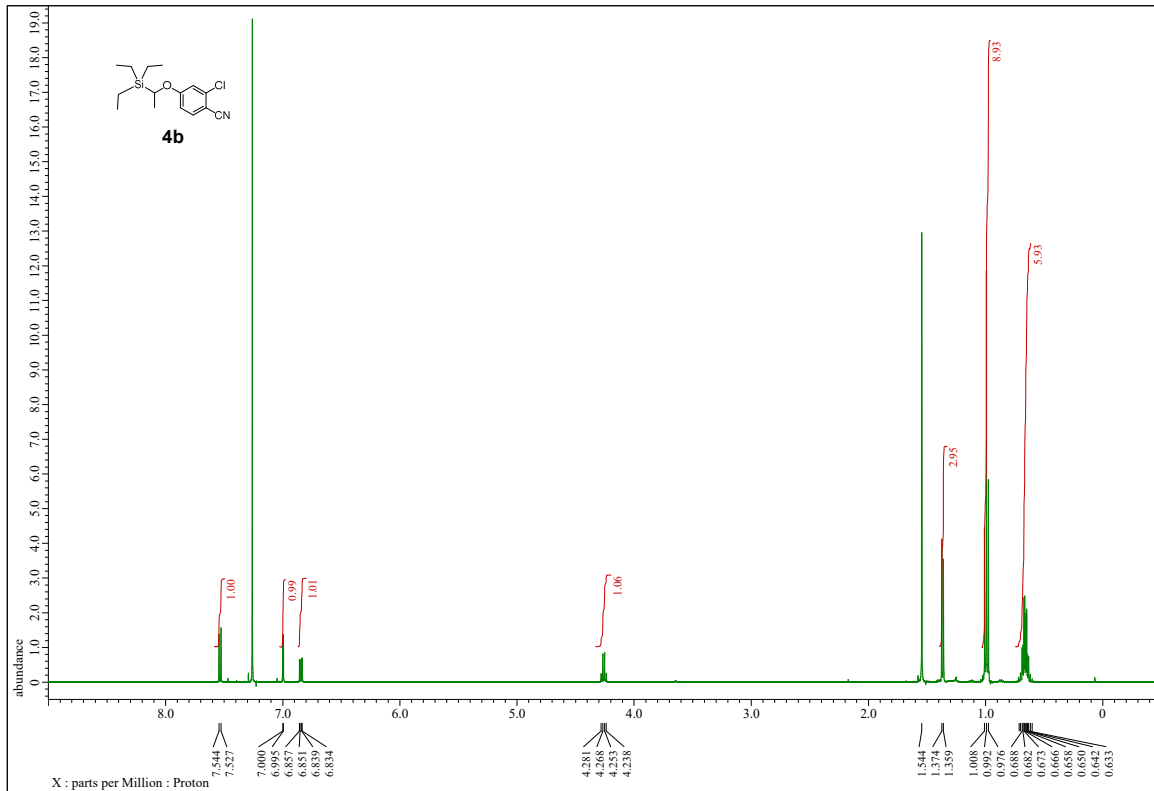

**JEOL**

```

Filename = 270-014-4_col11-15_GPC_Pr
Author = delta
Experiment = proton.jmp
Sample_id = 270-014-4_col11-15_GPC
Solvent = CHLOROFORM-D
Actual_Start_Time = 27-JUN-2023 13:16:10
Revision_Time = 20-FEB-2024 12:07:11

Comment = single pulse
Data_Format = 1D COMPLEX
Dim_Size = 13107
X_Domain = Proton
Dim_Title = Proton
Dim_Units = [ppm]
Dimensions = X
Site = JNM-ECA500
Spectrometer = DELTA2_NMR

Field_Strength = 11.7473579[T] (500[MHz])
X_Acq_Duration = 1.74587904[s]
X_Domain = 1H
X_Freq = 500.15991521[MHz]
X_Offset = 5.0[ppm]
X_Points = 14284
X_Prescans = 1
X_Resolution = 0.57277737[Hz]
X_Sweep = 9.38438438[kHz]
X_Sweep_Clipped = 7.50750751[kHz]
Irr_Domain = Proton
Irr_Freq = 500.15991521[MHz]
Irr_Offset = 5.0[ppm]
Tri_Domain = Proton
Tri_Freq = 500.15991521[MHz]
Tri_Offset = 5.0[ppm]
Clipped = FALSE
Scans = 16
Total_Scans = 16

Relaxation_Delay = 5[s]
Recv_gain = 58
Temp_Set = 22[dc]
X_90_Width = 6.7[us]
X_Acq_Time = 1.74587904[s]
X_Angle = 45[deg]
X_Atn = 2.5[db]
X_Pulse = 3.35[us]
Irr_Mode = Off
Tri_Mode = Off
Dnfs_Preset = FIDSE
Initial_Wait = 1[s]
Repetition_Time = 6.74587904[s]

```

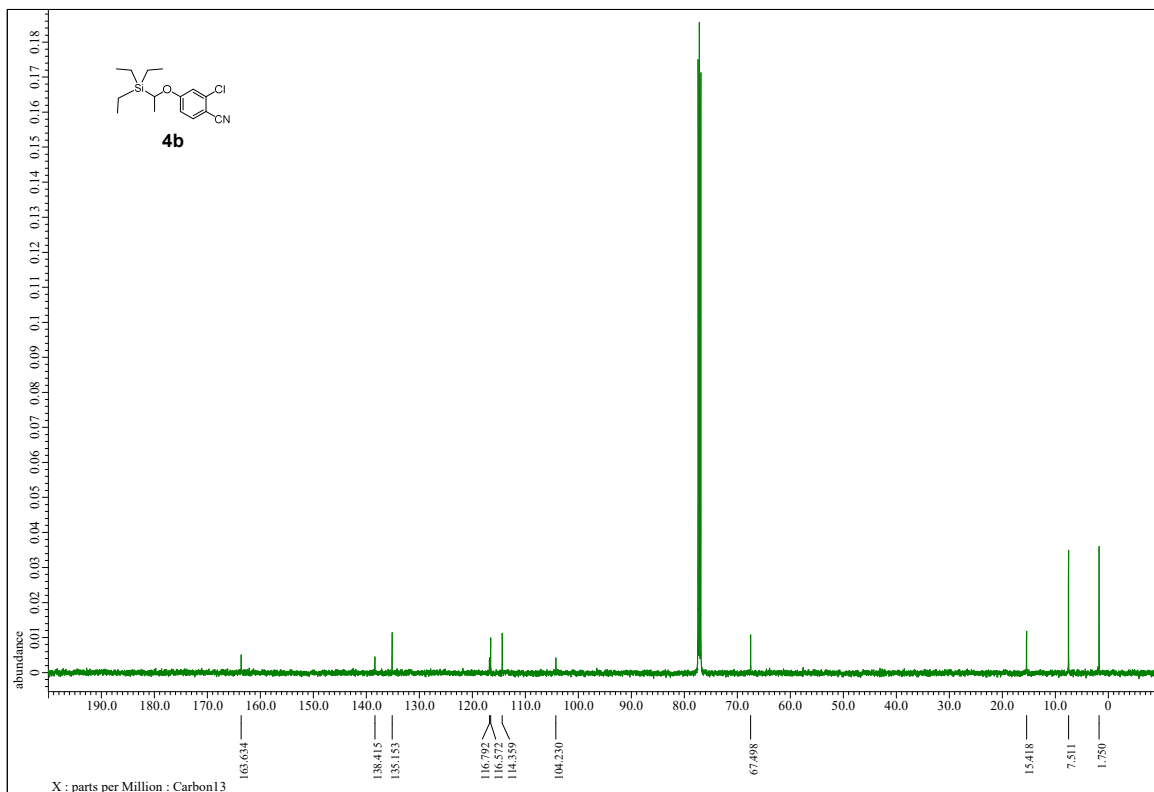

**JEOL**

```

Filename = NAN045(true)_Carbon-2-4.j
Author = delta
Experiment = carbon.jmp
Sample_id = NAN045
Solvent = CHLOROFORM-D
Actual_Start_Time = 3-AUG-2023 17:25:55
Revision_Time = 20-FEB-2024 12:11:22

Comment = single pulse decoupled ga
Data_Format = 1D COMPLEX
Dim_Size = 26214
X_Domain = Carbon
Dim_Title = Carbon13
Dim_Units = [ppm]
Dimensions = X
Site = JNM-ECA500
Spectrometer = DELTA2_NMR

Field_Strength = 11.7473579[T] (500[MHz])
X_Acq_Duration = 0.83361792[s]
X_Domain = 13C
X_Freq = 125.76529768[MHz]
X_Offset = 100[ppm]
X_Points = 32768
X_Prescans = 4
X_Resolution = 1.19959034[Hz]
X_Sweep = 39.3081761[kHz]
X_Sweep_Clipped = 31.44654088[kHz]
Irr_Domain = Proton
Irr_Freq = 500.15991521[MHz]
Irr_Offset = 5.0[ppm]
Clipped = FALSE
Scans = 1024
Total_Scans = 1024

Relaxation_Delay = 2[s]
Recv_gain = 50
Temp_Set = 22.7[dc]
X_90_Width = 12.65[us]
X_Acq_Time = 0.83361792[s]
X_Angle = 90[deg]
X_Atn = 7[db]
X_Pulse = 4.2166667[us]
Irr_Atn_Dec = 25.254[db]
Irr_Atn_NoE = 25.254[db]
Irr_Noise = WALTZ16
Irr_Pwidth = 92[us]
Decoupling = TRUE
Initial_Wait = 1[s]
Noe = TRUE
Noe_Time = 2[s]
Repetition_Time = 2.83361792[s]

```

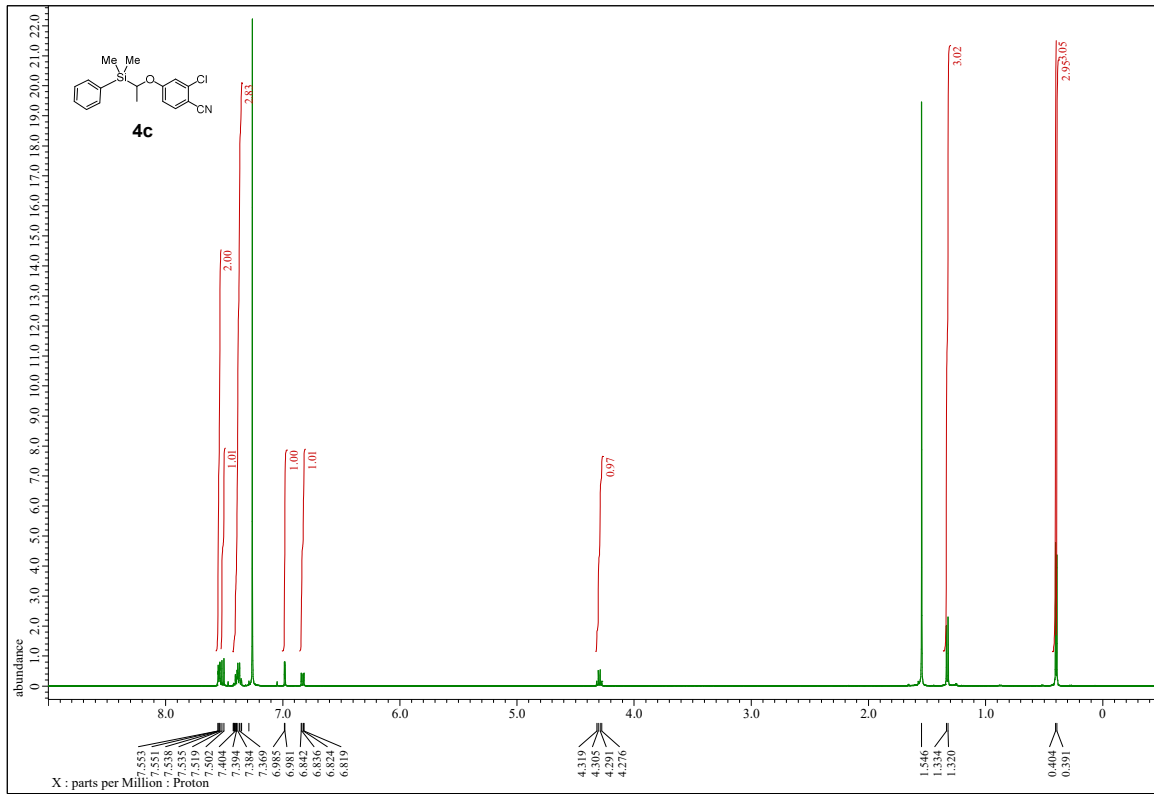

**JEOL**

|                   |                             |
|-------------------|-----------------------------|
| Filename          | = 190c0120-25_GFC_Proton-2- |
| Author            | = delta                     |
| Experiment        | = proton.jxp                |
| Sample_id         | = 190c0120-25_GFC           |
| Solvent           | = CHLOROFORM-D              |
| Actual_Start_Time | = 26-APR-2023 21:02:29      |
| Revision_Time     | = 20-FEB-2024 12:16:16      |
| Comment           | = single pulse              |
| Data_Format       | = 1D_COMPLEX                |
| Dim_Size          | = 13107                     |
| X_Domain          | = Proton                    |
| Dim_Title         | = Proton                    |
| Dim_Units         | = [ppm]                     |
| Dimensions        | = X                         |
| Site              | = JNM-ECA500                |
| Spectrometer      | = DELTA2_NMR                |
| Field_Strength    | = 11.7473579[T] (500[MHz])  |
| X_Acq_Duration    | = 1.74587904[s]             |
| X_Domain          | = 1H                        |
| X_Freq            | = 500.15991521[MHz]         |
| X_Offset          | = 5.0[ppm]                  |
| X_Points          | = 16284                     |
| X_Prescans        | = 1                         |
| X_Resolution      | = 0.57277737[Hz]            |
| X_Sweep           | = 9.38484438[kHz]           |
| X_Sweep_Clipped   | = 7.50750751[kHz]           |
| Irr_Domain        | = Proton                    |
| Irr_Freq          | = 500.15991521[MHz]         |
| Irr_Offset        | = 5.0[ppm]                  |
| Tri_Domain        | = Proton                    |
| Tri_Freq          | = 500.15991521[MHz]         |
| Tri_Offset        | = 5.0[ppm]                  |
| Clipped           | = FALSE                     |
| Scans             | = 256                       |
| Total_scans       | = 256                       |
| Relaxation_Delay  | = 5[s]                      |
| Recv_gain         | = 66                        |
| Temp_Set          | = 21.3[dc]                  |
| X_90_Width        | = 6.7[us]                   |
| X_Acq_Time        | = 1.74587904[s]             |
| X_Angle           | = 45[deg]                   |
| X_Atn             | = 2.5[db]                   |
| X_Pulse           | = 3.35[us]                  |
| Irr_Mode          | = Off                       |
| Tri_Mode          | = Off                       |
| Daqts_Preset      | = FALSE                     |
| Initial_Wait      | = 1[s]                      |
| Repetition_Time   | = 6.74587904[s]             |

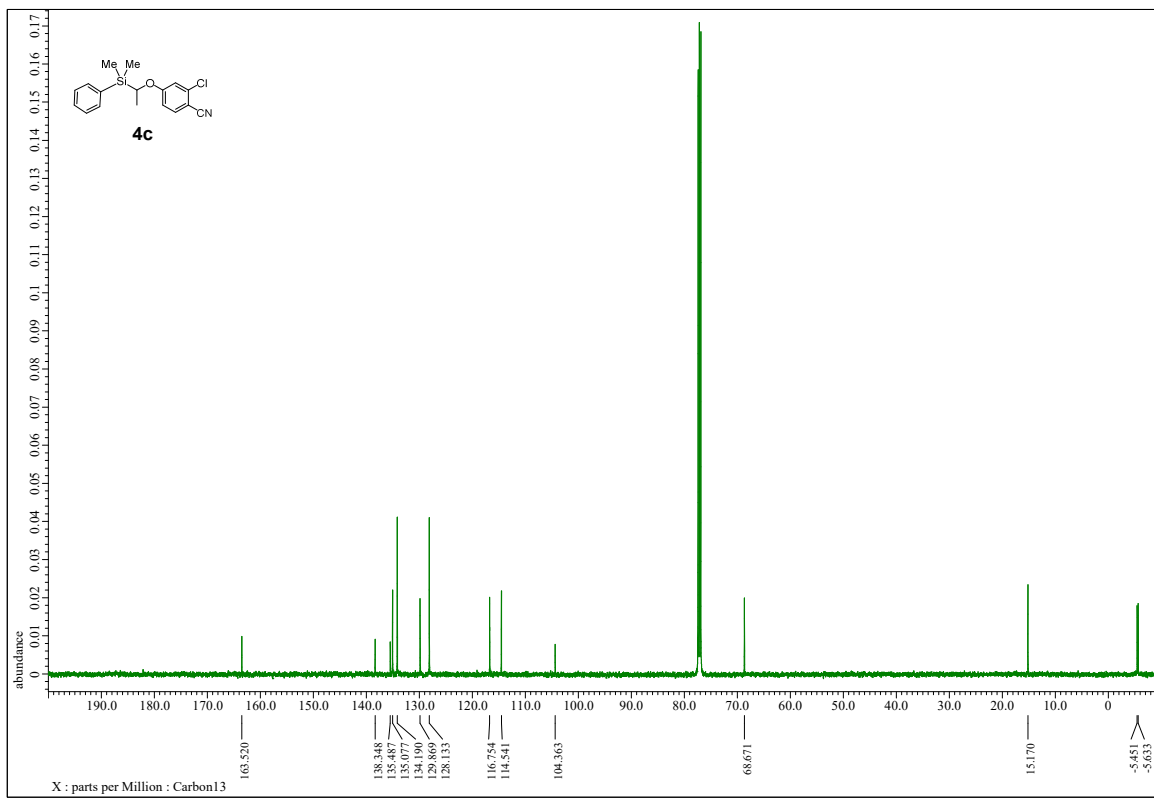

**JEOL**

|                   |                             |
|-------------------|-----------------------------|
| Filename          | = NAN037_Carbon-1-3.jdf     |
| Author            | = delta                     |
| Experiment        | = carbon.jxp                |
| Sample_id         | = NAN037                    |
| Solvent           | = CHLOROFORM-D              |
| Actual_Start_Time | = 3-NOV-2023 14:04:04       |
| Revision_Time     | = 20-FEB-2024 12:28:17      |
| Comment           | = single pulse decoupled ga |
| Data_Format       | = 1D_COMPLEX                |
| Dim_Size          | = 26214                     |
| X_Domain          | = Carbon                    |
| Dim_Title         | = Carbon13                  |
| Dim_Units         | = [ppm]                     |
| Dimensions        | = X                         |
| Site              | = JNM-ECA500                |
| Spectrometer      | = DELTA2_NMR                |
| Field_Strength    | = 11.7473579[T] (500[MHz])  |
| X_Acq_Duration    | = 0.83361792[s]             |
| X_Domain          | = 13C                       |
| X_Freq            | = 125.76529768[MHz]         |
| X_Offset          | = 100[ppm]                  |
| X_Points          | = 32768                     |
| X_Prescans        | = 4                         |
| X_Resolution      | = 1.19959034[Hz]            |
| X_Sweep           | = 39.3081761[kHz]           |
| X_Sweep_Clipped   | = 31.44654088[kHz]          |
| Irr_Domain        | = Proton                    |
| Irr_Freq          | = 500.15991521[MHz]         |
| Irr_Offset        | = 5.0[ppm]                  |
| Clipped           | = FALSE                     |
| Scans             | = 2048                      |
| Total_scans       | = 2048                      |
| Relaxation_Delay  | = 2[s]                      |
| Recv_gain         | = 50                        |
| Temp_Set          | = 21.3[dc]                  |
| X_90_Width        | = 12.65[us]                 |
| X_Acq_Time        | = 0.83361792[s]             |
| X_Angle           | = 90[deg]                   |
| X_Atn             | = 7[db]                     |
| X_Pulse           | = 4.2166667[us]             |
| Irr_Atn_Dec       | = 25.254[db]                |
| Irr_Atn_Noise     | = 25.254[db]                |
| Irr_Noise         | = WALTZ                     |
| Irr_Pwidth        | = 92[us]                    |
| Decoupling        | = TRUE                      |
| Initial_Wait      | = 1[s]                      |
| Noe               | = TRUE                      |
| Noe_Time          | = 2[s]                      |
| Repetition_Time   | = 2.83361792[s]             |



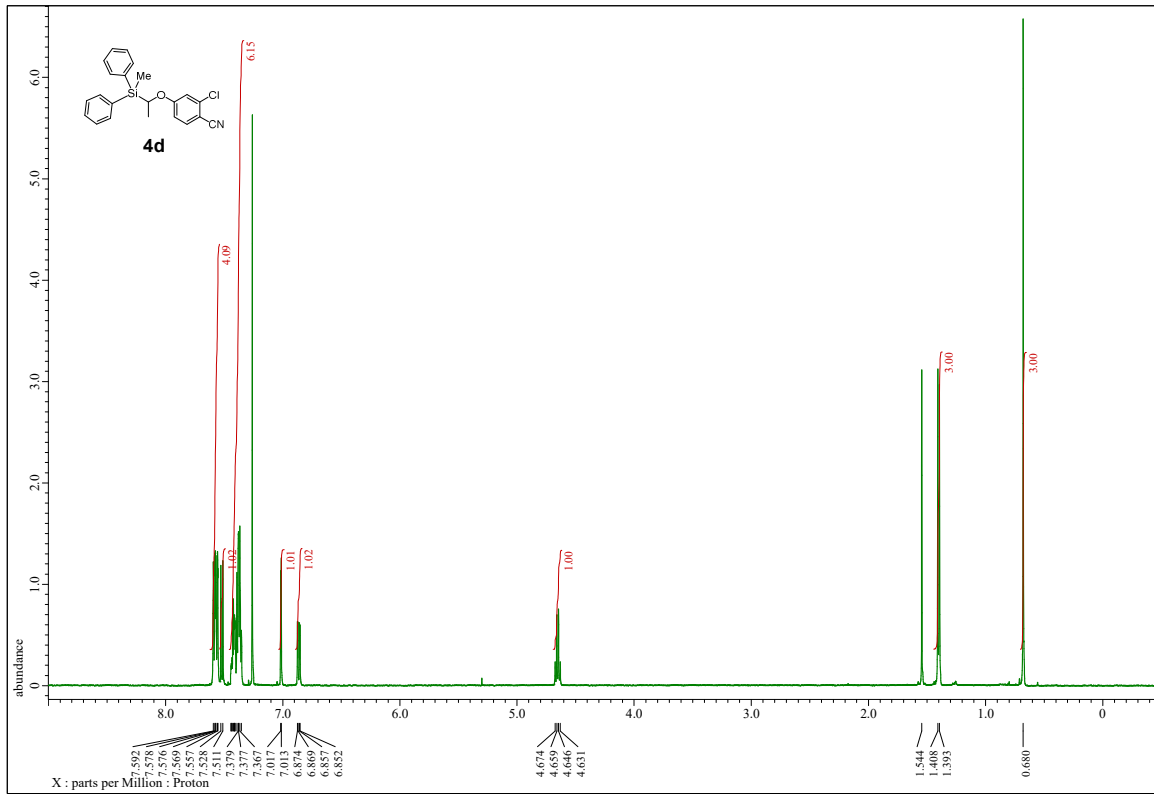

**JEOL**

|                   |                             |
|-------------------|-----------------------------|
| Filename          | = NAN39_240219_Proton-1-3.j |
| Author            | = delta                     |
| Experiment        | = proton.jxp                |
| Sample_id         | = NAN39_240219              |
| Solvent           | = CHLOROFORM-D              |
| Actual_Start_Time | = 19-FEB-2024 22:38:11      |
| Revision_Time     | = 20-FEB-2024 12:30:54      |
| Comment           | = single pulse              |
| Data_Format       | = 1D COMPLEX                |
| Dim_Size          | = 13107                     |
| X_Domain          | = Proton                    |
| Dim_Title         | = Proton                    |
| Dim_Units         | = [ppm]                     |
| Dimensions        | = X                         |
| Site              | = JNM-ECA500                |
| Spectrometer      | = DELTA2_NMR                |
| Field_Strength    | = 11.7473579[T] (500[MHz])  |
| X_Acq_Duration    | = 1.74587904[s]             |
| X_Domain          | = 18                        |
| X_Freq            | = 500.15991521[MHz]         |
| X_Offset          | = 5.0[ppm]                  |
| X_Points          | = 16284                     |
| X_Prescans        | = 1                         |
| X_Resolution      | = 0.57277737[Hz]            |
| X_Sweep           | = 9.38438438[kHz]           |
| X_Sweep_Clipped   | = 7.50750751[kHz]           |
| Irr_Domain        | = Proton                    |
| Irr_Freq          | = 500.15991521[MHz]         |
| Irr_Offset        | = 5.0[ppm]                  |
| Tri_Domain        | = Proton                    |
| Tri_Freq          | = 500.15991521[MHz]         |
| Tri_Offset        | = 5.0[ppm]                  |
| Clipped           | = FALSE                     |
| Scans             | = 16                        |
| Total_Scans       | = 16                        |
| Relaxation_Delay  | = 5[s]                      |
| Recv Gain         | = 50                        |
| Temp_Set          | = 21.[dC]                   |
| X_90_Width        | = 6.7[us]                   |
| X_Acq_Time        | = 1.74587904[s]             |
| X_Angle           | = 45[deg]                   |
| X_Atn             | = 2.5[dB]                   |
| X_Pulse           | = 3.35[us]                  |
| Irr_Mode          | = Off                       |
| Tri_Mode          | = Off                       |
| Daqts_Preset      | = FALSE                     |
| Initial_Wait      | = 1[s]                      |
| Repetition_Time   | = 6.74587904[s]             |

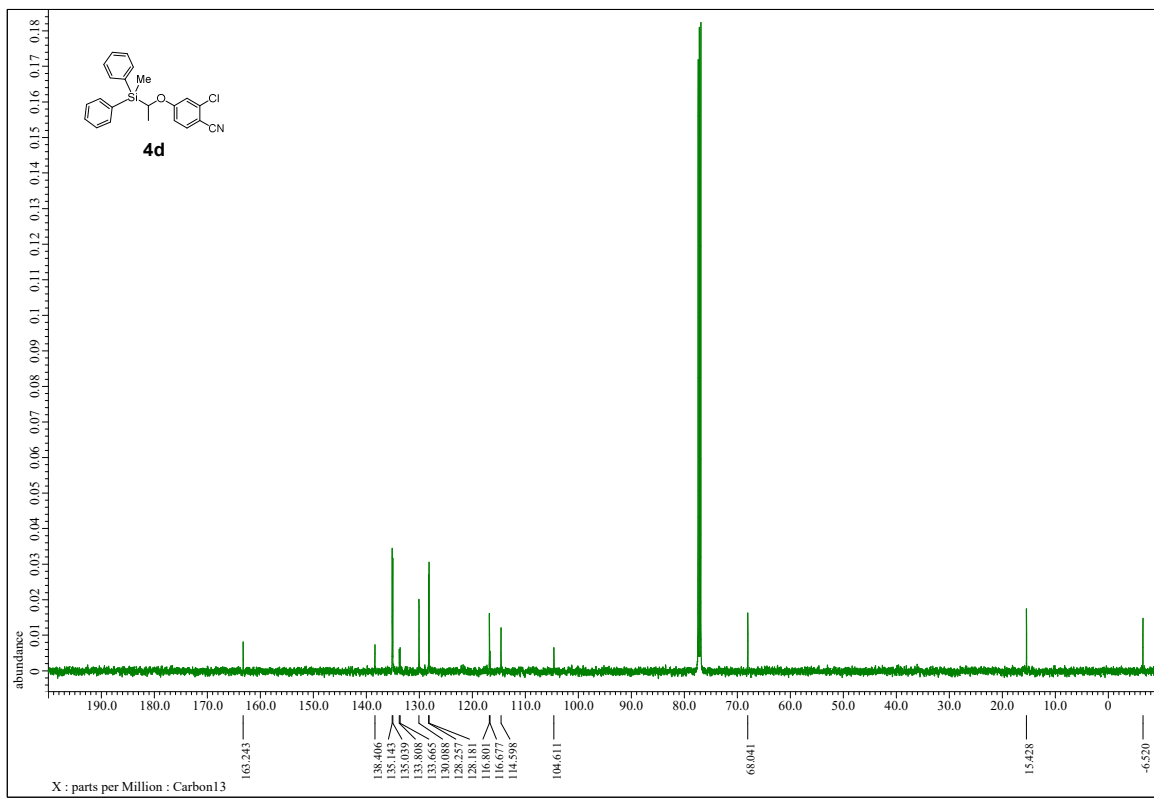

**JEOL**

|                   |                             |
|-------------------|-----------------------------|
| Filename          | = NAN39_Carbon-1-3.jdf      |
| Author            | = delta                     |
| Experiment        | = carbon.jxp                |
| Sample_id         | = NAN39                     |
| Solvent           | = CHLOROFORM-D              |
| Actual_Start_Time | = 3-NOV-2023 18:23:44       |
| Revision_Time     | = 20-FEB-2024 12:32:13      |
| Comment           | = single pulse decoupled ga |
| Data_Format       | = 1D COMPLEX                |
| Dim_Size          | = 26214                     |
| X_Domain          | = Carbon                    |
| Dim_Title         | = Carbon13                  |
| Dim_Units         | = [ppm]                     |
| Dimensions        | = X                         |
| Site              | = JNM-ECA500                |
| Spectrometer      | = DELTA2_NMR                |
| Field_Strength    | = 11.7473579[T] (500[MHz])  |
| X_Acq_Duration    | = 0.83361792[s]             |
| X_Domain          | = 13C                       |
| X_Freq            | = 125.76529768[MHz]         |
| X_Offset          | = 100[ppm]                  |
| X_Points          | = 32768                     |
| X_Prescans        | = 4                         |
| X_Resolution      | = 1.19959034[Hz]            |
| X_Sweep           | = 39.3081761[kHz]           |
| X_Sweep_Clipped   | = 31.44654088[kHz]          |
| Irr_Domain        | = Proton                    |
| Irr_Freq          | = 500.15991521[MHz]         |
| Irr_Offset        | = 5.0[ppm]                  |
| Clipped           | = FALSE                     |
| Scans             | = 512                       |
| Total_Scans       | = 512                       |
| Relaxation_Delay  | = 2[s]                      |
| Recv Gain         | = 50                        |
| Temp_Set          | = 21.[dC]                   |
| X_90_Width        | = 12.65[us]                 |
| X_Acq_Time        | = 0.83361792[s]             |
| X_Angle           | = 90[deg]                   |
| X_Atn             | = 7[db]                     |
| X_Pulse           | = 4.2166667[us]             |
| Irr_Atn_Dec       | = 25.254[db]                |
| Irr_Atn_Noise     | = 25.254[db]                |
| Irr_Noise         | = WALTZ                     |
| Irr_Pwidth        | = 92[us]                    |
| Decoupling        | = TRUE                      |
| Initial_Wait      | = 1[s]                      |
| Noe               | = TRUE                      |
| Noe_Time          | = 2[s]                      |
| Repetition_Time   | = 2.83361792[s]             |

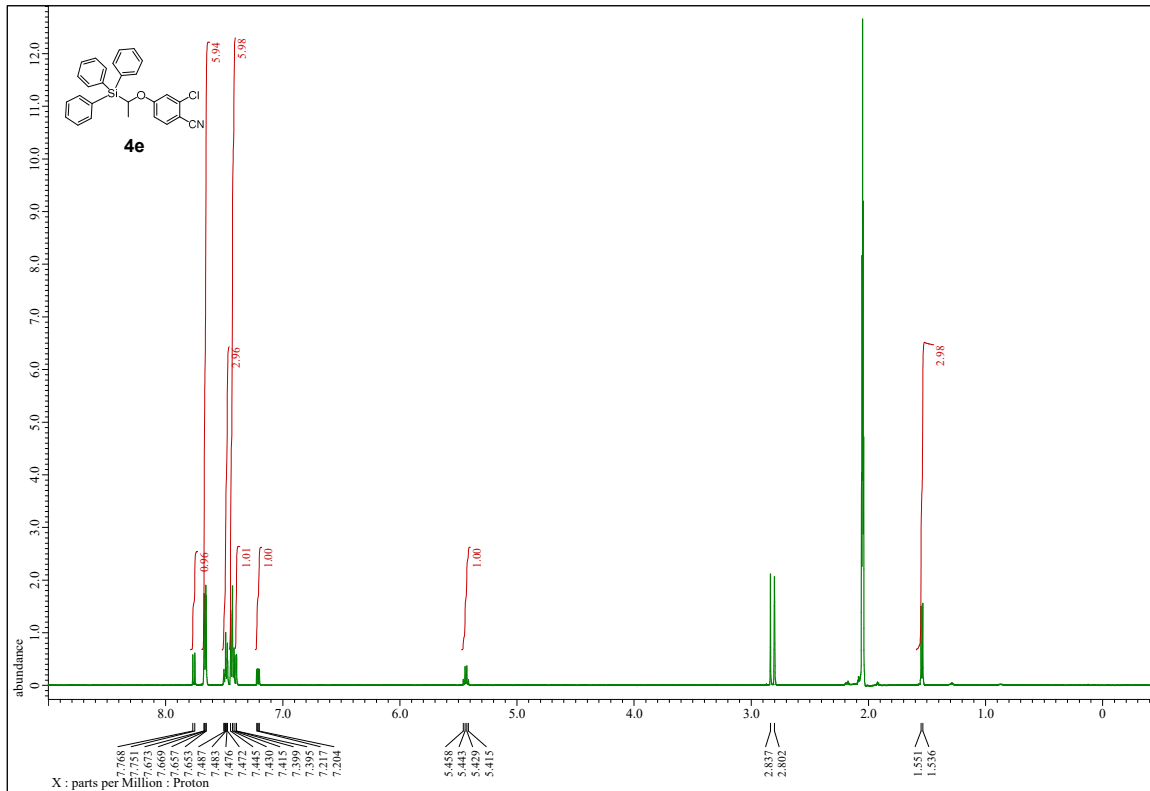

**JEOL**

|                   |                             |
|-------------------|-----------------------------|
| Filename          | = NAN43_240221_Proton-1-3.j |
| Author            | = delta                     |
| Experiment        | = proton.jxp                |
| Sample_id         | = NAN43_240221              |
| Solvent           | = ACETONE-D6                |
| Actual_Start_Time | = 21-FEB-2024 12:39:45      |
| Revision_Time     | = 21-FEB-2024 13:55:50      |
| Comment           | = single pulse              |
| Data_Format       | = 1D_COMPLEX                |
| Dim_Size          | = 13107                     |
| X_Domain          | = Proton                    |
| Dim_Title         | = Proton                    |
| Dim_Units         | = [ppm]                     |
| Dimensions        | = X                         |
| Site              | = JNM-ECA500                |
| Spectrometer      | = DELTA2_NMR                |
| Field_Strength    | = 11.7473579[T] (500[MHz])  |
| X_Acq_Duration    | = 1.74587904[s]             |
| X_Domain          | = 18                        |
| X_Freq            | = 500.15991521[MHz]         |
| X_Offset          | = 5.0[ppm]                  |
| X_Points          | = 14284                     |
| X_Prescans        | = 1                         |
| X_Resolution      | = 0.57277737[Hz]            |
| X_Sweep           | = 9.3848438[kHz]            |
| X_Sweep_Clipped   | = 7.50750751[kHz]           |
| Irr_Domain        | = Proton                    |
| Irr_Freq          | = 500.15991521[MHz]         |
| Irr_Offset        | = 5.0[ppm]                  |
| Tri_Domain        | = Proton                    |
| Tri_Freq          | = 500.15991521[MHz]         |
| Tri_Offset        | = 5.0[ppm]                  |
| Clipped           | = FALSE                     |
| Scans             | = 16                        |
| Total_Scans       | = 16                        |
| Relaxation_Delay  | = 5[s]                      |
| Recv_gain         | = 60                        |
| Temp_Set          | = 13.7[dC]                  |
| X_90_Width        | = 6.7[us]                   |
| X_Acq_Time        | = 1.74587904[s]             |
| X_Angle           | = 45[deg]                   |
| X_Atn             | = 2.5[dB]                   |
| X_Pulse           | = 3.35[us]                  |
| Irr_Mode          | = Off                       |
| Tri_Mode          | = Off                       |
| Datns_Preset      | = FIDSE                     |
| Initial_Wait      | = 1[s]                      |
| Repetition_Time   | = 6.74587904[s]             |

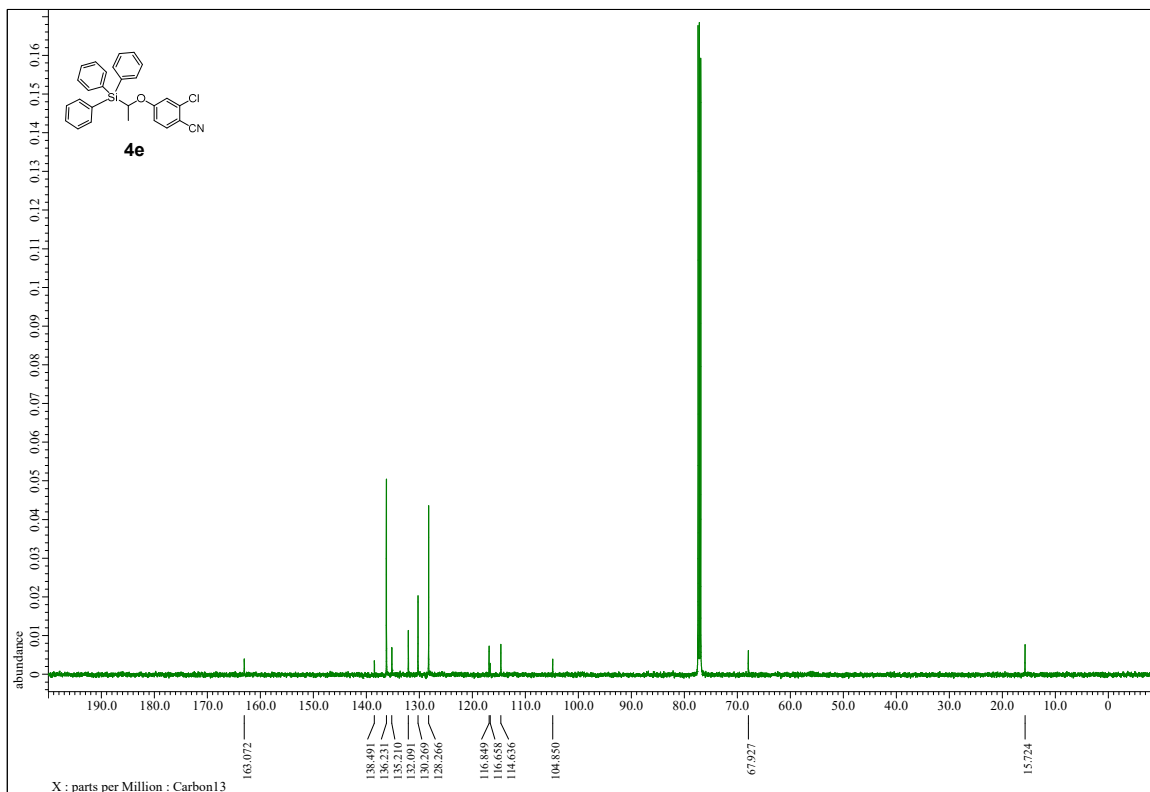

**JEOL**

|                   |                             |
|-------------------|-----------------------------|
| Filename          | = NAN041_Carbon-1-3.jdf     |
| Author            | = delta                     |
| Experiment        | = carbon.jxp                |
| Sample_id         | = NAN041                    |
| Solvent           | = CHLOROFORM-D              |
| Actual_Start_Time | = 20-FEB-2024 20:53:47      |
| Revision_Time     | = 20-FEB-2024 12:46:44      |
| Comment           | = single pulse decoupled ga |
| Data_Format       | = 1D_COMPLEX                |
| Dim_Size          | = 26214                     |
| X_Domain          | = Carbon                    |
| Dim_Title         | = Carbon13                  |
| Dim_Units         | = [ppm]                     |
| Dimensions        | = X                         |
| Site              | = JNM-ECA500                |
| Spectrometer      | = DELTA2_NMR                |
| Field_Strength    | = 11.7473579[T] (500[MHz])  |
| X_Acq_Duration    | = 0.83361792[s]             |
| X_Domain          | = 13C                       |
| X_Freq            | = 125.76529768[MHz]         |
| X_Offset          | = 100[ppm]                  |
| X_Points          | = 32768                     |
| X_Prescans        | = 4                         |
| X_Resolution      | = 1.19959034[Hz]            |
| X_Sweep           | = 39.3081761[kHz]           |
| X_Sweep_Clipped   | = 31.44654088[kHz]          |
| Irr_Domain        | = Proton                    |
| Irr_Freq          | = 500.15991521[MHz]         |
| Irr_Offset        | = 5.0[ppm]                  |
| Clipped           | = FALSE                     |
| Scans             | = 2048                      |
| Total_Scans       | = 2048                      |
| Relaxation_Delay  | = 2[s]                      |
| Recv_gain         | = 50                        |
| Temp_Set          | = 24.9[dC]                  |
| X_90_Width        | = 12.65[us]                 |
| X_Acq_Time        | = 0.83361792[s]             |
| X_Angle           | = 90[deg]                   |
| X_Atn             | = 7[db]                     |
| X_Pulse           | = 4.2166667[us]             |
| Irr_Atn_Dec       | = 25.254[db]                |
| Irr_Atn_No        | = 25.254[db]                |
| Irr_Noise         | = WALTZ                     |
| Irr_Width         | = 92[us]                    |
| Decoupling        | = TRUE                      |
| Initial_Wait      | = 1[s]                      |
| Noe               | = TRUE                      |
| Noe_Time          | = 2[s]                      |
| Repetition_Time   | = 2.83361792[s]             |

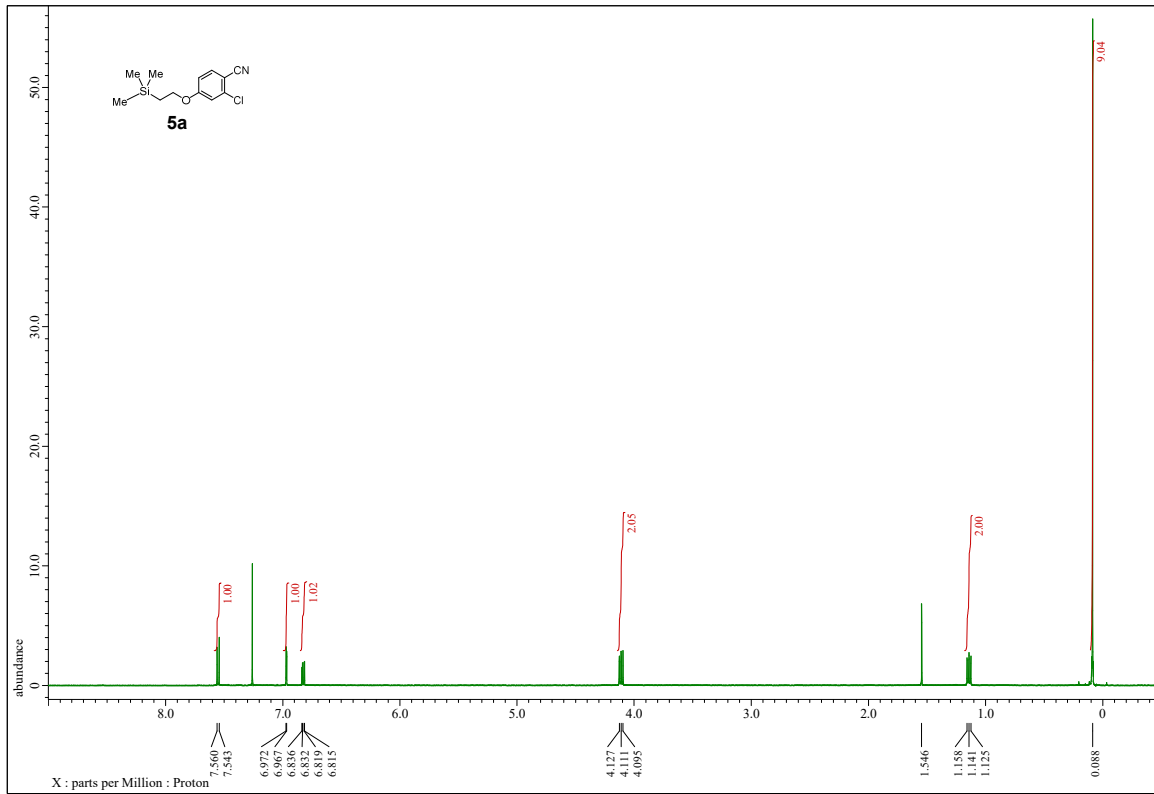

**JEOL**

|                   |                             |
|-------------------|-----------------------------|
| Filename          | = 270-023-3_GPC287-292_Prot |
| Author            | = delta                     |
| Experiment        | = proton.jxp                |
| Sample_id         | = 270-023-3_GPC287-292      |
| Solvent           | = CHLOROFORM-D              |
| Actual_Start_Time | = 18-JUL-2023 20:56:21      |
| Revision_Time     | = 20-FEB-2024 12:51:05      |
| Comment           | = single pulse              |
| Data_Format       | = 1D COMPLEX                |
| Dim_Size          | = 13107                     |
| X_Domain          | = Proton                    |
| Dim_Title         | = Proton                    |
| Dim_Units         | = [ppm]                     |
| Dimensions        | = X                         |
| Site              | = JNM-ECA500                |
| Spectrometer      | = DELTA2_NMR                |
| Field_Strength    | = 11.7473579 [T] (500[MHz]) |
| X_Acq_Duration    | = 1.74587904 [s]            |
| X_Domain          | = 18                        |
| X_Freq            | = 500.15991521 [MHz]        |
| X_Offset          | = 5.0 [ppm]                 |
| X_Points          | = 14284                     |
| X_Prescans        | = 1                         |
| X_Resolution      | = 0.57277737 [Hz]           |
| X_Sweep           | = 9.38438438 [kHz]          |
| X_Sweep_Clipped   | = 7.50750751 [kHz]          |
| Irr_Domain        | = Proton                    |
| Irr_Freq          | = 500.15991521 [MHz]        |
| Irr_Offset        | = 5.0 [ppm]                 |
| Tri_Domain        | = Proton                    |
| Tri_Freq          | = 500.15991521 [MHz]        |
| Tri_Offset        | = 5.0 [ppm]                 |
| Clipped           | = FALSE                     |
| Scans             | = 16                        |
| Total_Scans       | = 16                        |
| Relaxation_Delay  | = 5 [s]                     |
| Recv_gain         | = 58                        |
| Temp_Set          | = 27. [dC]                  |
| X_90_Width        | = 6.7 [us]                  |
| X_Acq_Time        | = 1.74587904 [s]            |
| X_Angle           | = 45 [deg]                  |
| X_Atn             | = 2.5 [dB]                  |
| X_Pulse           | = 3.35 [us]                 |
| Irr_Mode          | = Off                       |
| Tri_Mode          | = Off                       |
| Delta_Preset      | = FALSE                     |
| Initial_Wait      | = 1 [s]                     |
| Repetition_Time   | = 6.74587904 [s]            |

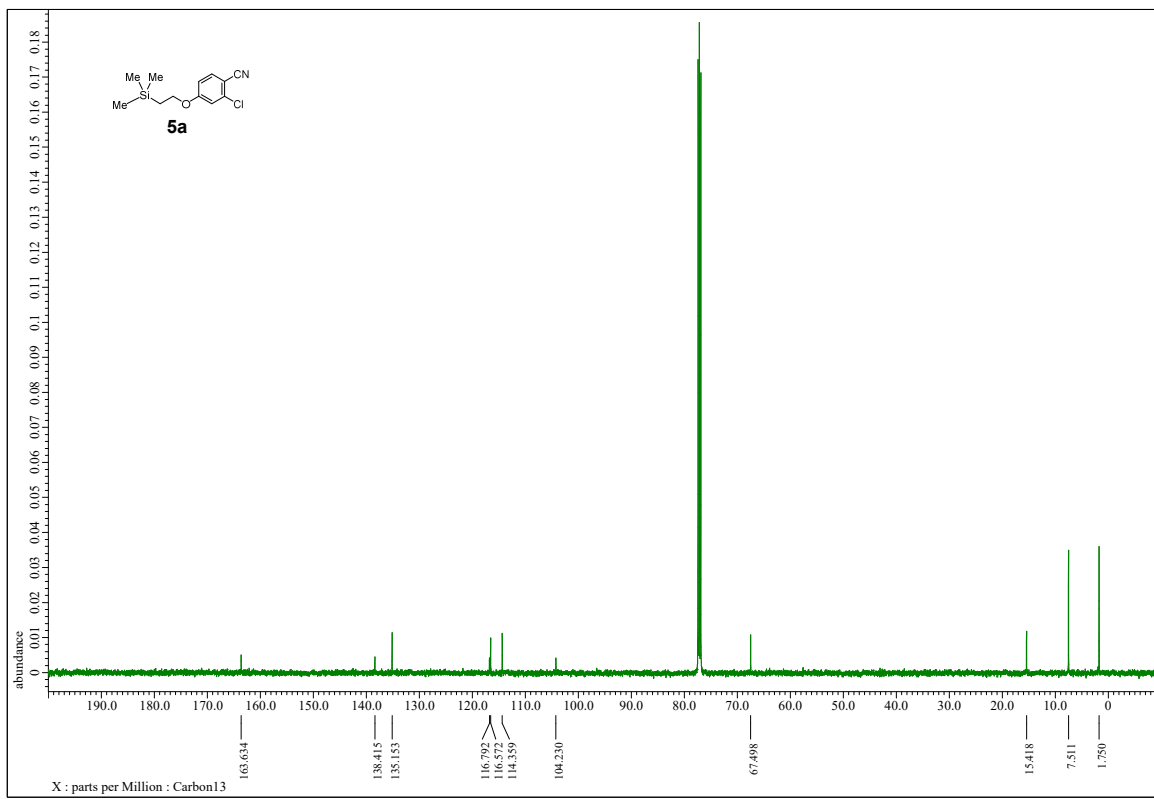

**JEOL**

|                   |                               |
|-------------------|-------------------------------|
| Filename          | = NAN045 (true)_Carbon-2-5..j |
| Author            | = delta                       |
| Experiment        | = carbon.jxp                  |
| Sample_id         | = NAN045                      |
| Solvent           | = CHLOROFORM-D                |
| Actual_Start_Time | = 3-AUG-2023 17:25:55         |
| Revision_Time     | = 20-FEB-2024 12:52:25        |
| Comment           | = single pulse decoupled ga   |
| Data_Format       | = 1D COMPLEX                  |
| Dim_Size          | = 26214                       |
| X_Domain          | = Carbon                      |
| Dim_Title         | = Carbon13                    |
| Dim_Units         | = [ppm]                       |
| Dimensions        | = X                           |
| Site              | = JNM-ECA500                  |
| Spectrometer      | = DELTA2_NMR                  |
| Field_Strength    | = 11.7473579 [T] (500[MHz])   |
| X_Acq_Duration    | = 0.83361792 [s]              |
| X_Domain          | = 13C                         |
| X_Freq            | = 125.76529768 [MHz]          |
| X_Offset          | = 100 [ppm]                   |
| X_Points          | = 32768                       |
| X_Prescans        | = 4                           |
| X_Resolution      | = 1.19959034 [Hz]             |
| X_Sweep           | = 39.3081761 [kHz]            |
| X_Sweep_Clipped   | = 31.44654088 [kHz]           |
| Irr_Domain        | = Proton                      |
| Irr_Freq          | = 500.15991521 [MHz]          |
| Irr_Offset        | = 5.0 [ppm]                   |
| Clipped           | = FALSE                       |
| Scans             | = 1024                        |
| Total_Scans       | = 1024                        |
| Relaxation_Delay  | = 2 [s]                       |
| Recv_gain         | = 50                          |
| Temp_Set          | = 27. [dC]                    |
| X_90_Width        | = 12.65 [us]                  |
| X_Acq_Time        | = 0.83361792 [s]              |
| X_Angle           | = 90 [deg]                    |
| X_Atn             | = 7 [dB]                      |
| X_Pulse           | = 4.2166667 [us]              |
| Irr_Atn_Dec       | = 25.254 [dB]                 |
| Irr_Atn_Noise     | = 25.254 [dB]                 |
| Irr_Noise         | = WALTZ                       |
| Irr_Pwidth        | = 92 [us]                     |
| Decoupling        | = TRUE                        |
| Initial_Wait      | = 1 [s]                       |
| Noe               | = TRUE                        |
| Noe_Time          | = 2 [s]                       |
| Repetition_Time   | = 2.83361792 [s]              |

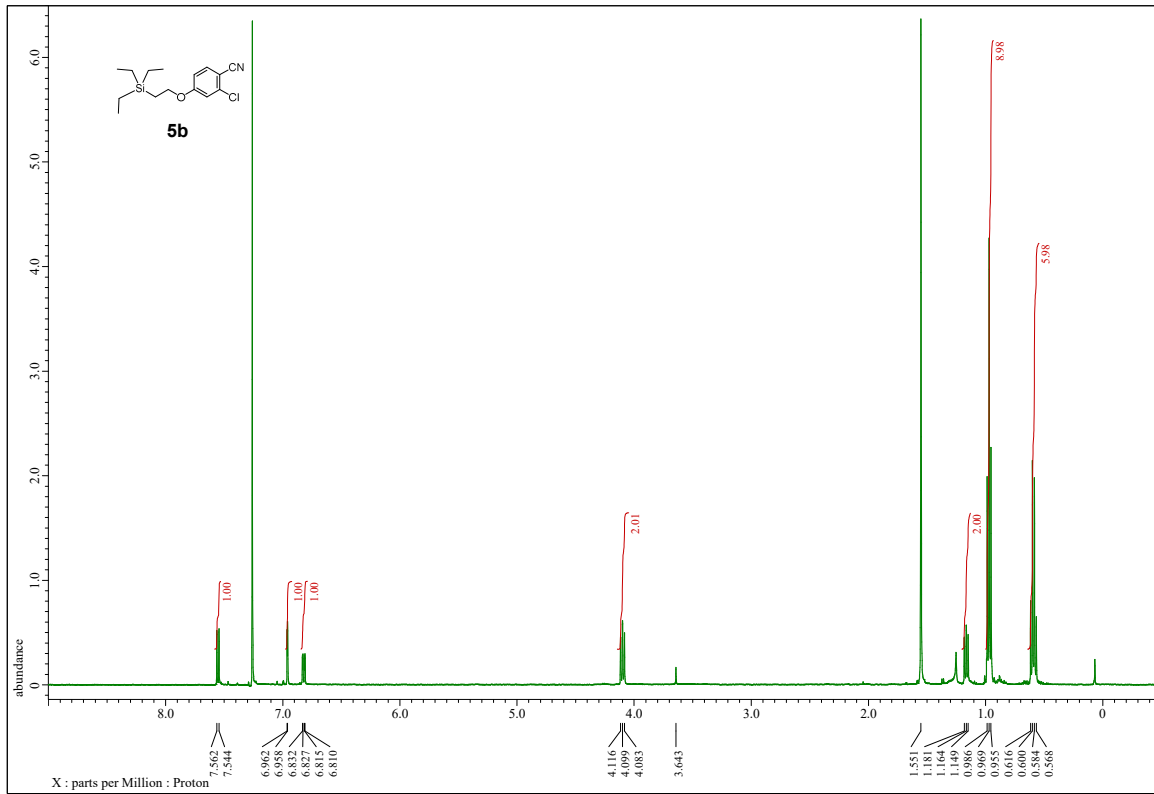

**JEOL**

```

Filename      = NAN46_coll3_Proton-2-2.jd
Author       = delta
Experiment   = proton.jmp
Sample_id    = NAN46_coll3
Solvent      = CHLOROFORM-D
Actual_Start_Time = 20-PEB-2024 22:46:10
Revision_Time   = 21-PEB-2024 11:48:35

Comment      = single pulse
Data_Format  = 1D COMPLEX
Dim_Size     = 13107
X_Domain     = Proton
Dim_Title    = Proton
Dim_Units    = [ppm]
Dimensions   = X
Site         = JNM-ECA500
Spectrometer = DELTA2_NMR

Field_Strength = 11.7473579[T] (500[MHz])
X_Acq_Duration = 1.74587904[s]
X_Domain       = 1H
X_Freq         = 500.15991521[MHz]
X_Offset       = 5.0[ppm]
X_Points       = 14284
X_Prescans    = 1
X_Resolution  = 0.57277737[Hz]
X_Sweep       = 9.38438438[kHz]
X_Sweep_Clipped = 7.50750751[kHz]
Irr_Domain    = Proton
Irr_Freq      = 500.15991521[MHz]
Irr_Offset    = 5.0[ppm]
Tri_Domain    = Proton
Tri_Freq      = 500.15991521[MHz]
Tri_Offset    = 5.0[ppm]
Clipped       = FALSE
Scans         = 64
Total_Scans   = 64

Relaxation_Delay = 5[s]
Recv_gain        = 60
Temp_Set         = 20.20[dC]
X_90_Width       = 6.7[us]
X_Acq_Time       = 1.74587904[s]
X_Angle          = 45[deg]
X_Atn            = 2.5[dB]
X_Pulse         = 3.35[us]
Irr_Mode         = Off
Tri_Mode         = Off
DANTE_Present   = FALSE
Initial_Wait    = 1[s]
Repetition_Time = 6.74587904[s]
  
```

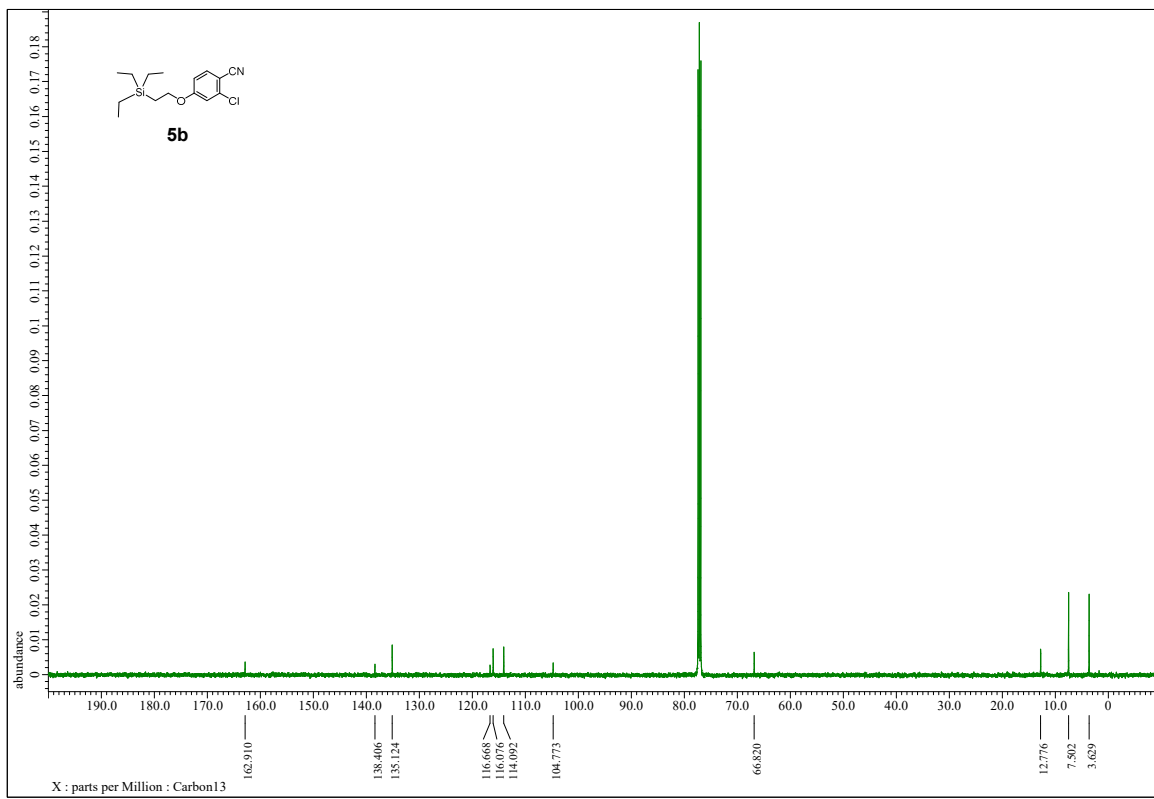

**JEOL**

```

Filename      = NAN46_Carbon-1-2.jdf
Author       = delta
Experiment   = carbon.jmp
Sample_id    = NAN46
Solvent      = CHLOROFORM-D
Actual_Start_Time = 20-PEB-2024 21:09:17
Revision_Time   = 20-PEB-2024 13:02:42

Comment      = single pulse decoupled ga
Data_Format  = 1D COMPLEX
Dim_Size     = 26214
X_Domain     = Carbon
Dim_Title    = Carbon13
Dim_Units    = [ppm]
Dimensions   = X
Site         = JNM-ECA500
Spectrometer = DELTA2_NMR

Field_Strength = 11.7473579[T] (500[MHz])
X_Acq_Duration = 0.83361792[s]
X_Domain       = 13C
X_Freq         = 125.76529768[MHz]
X_Offset       = 100[ppm]
X_Points       = 32768
X_Prescans    = 4
X_Resolution  = 1.19959034[Hz]
X_Sweep       = 39.3081761[kHz]
X_Sweep_Clipped = 31.44654088[kHz]
Irr_Domain    = Proton
Irr_Freq      = 500.15991521[MHz]
Irr_Offset    = 5.0[ppm]
Clipped       = FALSE
Scans         = 2048
Total_Scans   = 2048

Relaxation_Delay = 2[s]
Recv_gain        = 50
Temp_Set         = 22.8[dC]
X_90_Width       = 12.65[us]
X_Acq_Time       = 0.83361792[s]
X_Angle          = 90[deg]
X_Atn            = 7[db]
X_Pulse         = 4.2166667[us]
Irr_Atn_Dec     = 25.254[db]
Irr_Atn_Noise  = 25.254[db]
Irr_Noise       = WALTZ
Irr_Pwidth      = 92[us]
Decoupling      = TRUE
Initial_Wait    = 1[s]
Noe              = TRUE
Noe_Time        = 2[s]
Repetition_Time = 2.83361792[s]
  
```

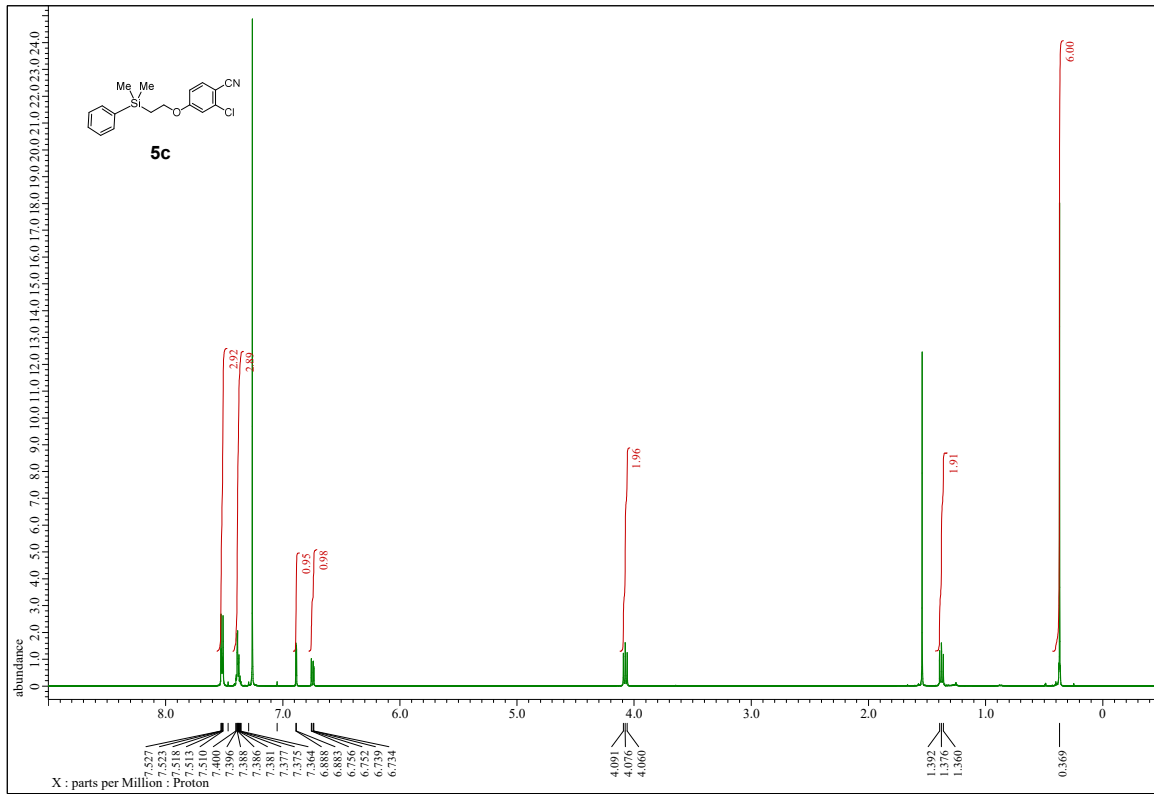

**JEOL**

|                   |                              |
|-------------------|------------------------------|
| Filename          | = 189col215-18_GPC_proton-1  |
| Author            | = delta                      |
| Experiment        | = proton.jxp                 |
| Sample_id         | = 189col215-18_GPC           |
| Solvent           | = CHLOROFORM-D               |
| Actual_Start_Time | = 26-APR-2023 15:01:59       |
| Revision_Time     | = 26-FEB-2024 13:06:45       |
| Comment           | = single pulse               |
| Data_Format       | = 1D COMPLEX                 |
| Dim_Size          | = 13107                      |
| X_Domain          | = Proton                     |
| Dim_Title         | = Proton                     |
| Dim_Units         | = [ppm]                      |
| Dimensions        | = X                          |
| Site              | = JNM-ECA500                 |
| Spectrometer      | = DELTA2_NMR                 |
| Field_Strength    | = 11.7473579 [T] (500 [MHz]) |
| X_Acq_Duration    | = 1.74587904 [s]             |
| X_Domain          | = 18                         |
| X_Freq            | = 500.15991521 [MHz]         |
| X_Offset          | = 5.0 [ppm]                  |
| X_Points          | = 16284                      |
| X_Prescans        | = 1                          |
| X_Resolution      | = 0.57277737 [Hz]            |
| X_Sweep           | = 9.38438438 [kHz]           |
| X_Sweep_Clipped   | = 7.50750751 [kHz]           |
| Irr_Domain        | = Proton                     |
| Irr_Freq          | = 500.15991521 [MHz]         |
| Irr_Offset        | = 5.0 [ppm]                  |
| Tri_Domain        | = Proton                     |
| Tri_Freq          | = 500.15991521 [MHz]         |
| Tri_Offset        | = 5.0 [ppm]                  |
| Clipped           | = FALSE                      |
| Scans             | = 256                        |
| Total_Scans       | = 256                        |
| Relaxation_Delay  | = 5 [s]                      |
| Recv_Gain         | = 64                         |
| Temp_Set          | = 21. [dC]                   |
| X_90_Width        | = 6.7 [us]                   |
| X_Acq_Time        | = 1.74587904 [s]             |
| X_Angle           | = 45 [deg]                   |
| X_Atn             | = 2.5 [dB]                   |
| X_Pulse           | = 3.35 [us]                  |
| Irr_Mode          | = Off                        |
| Tri_Mode          | = Off                        |
| Delta_Preset      | = FALSE                      |
| Initial_Wait      | = 1 [s]                      |
| Repetition_Time   | = 6.74587904 [s]             |

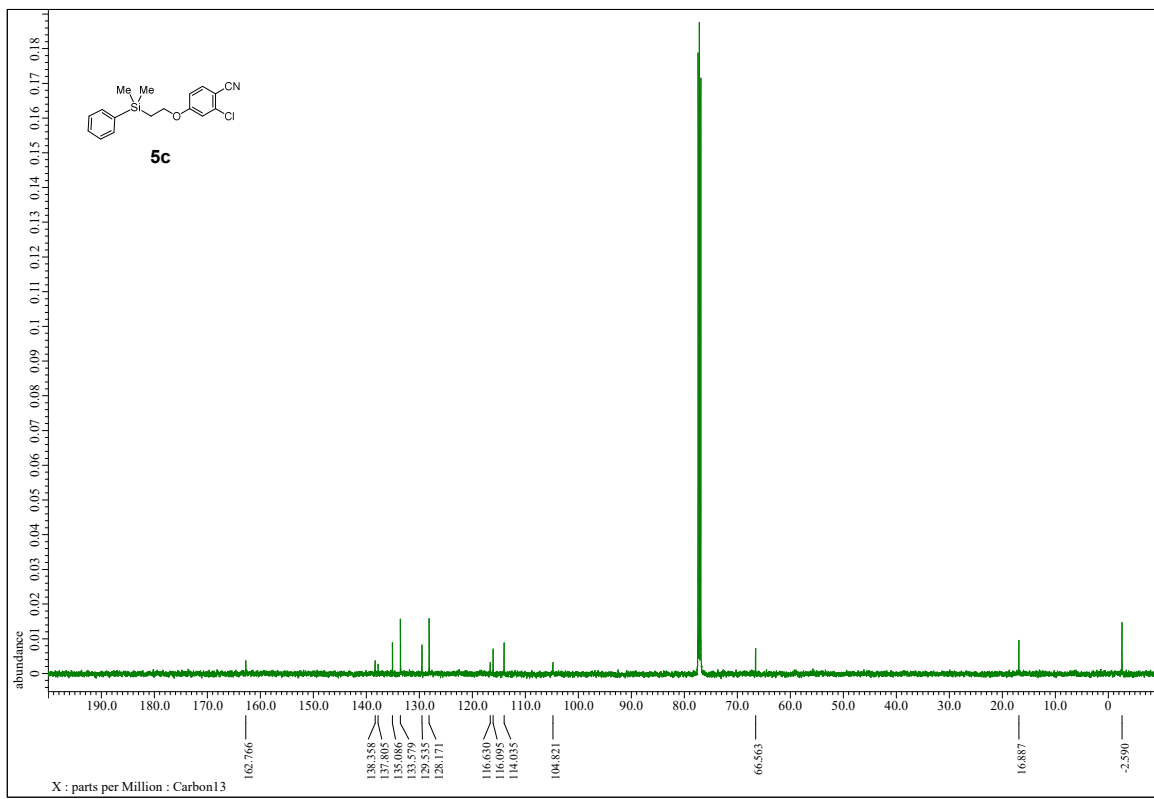

**JEOL**

|                   |                              |
|-------------------|------------------------------|
| Filename          | = NAN038_Carbon-1-7.jdf      |
| Author            | = delta                      |
| Experiment        | = carbon.jxp                 |
| Sample_id         | = NAN038                     |
| Solvent           | = CHLOROFORM-D               |
| Actual_Start_Time | = 3-NOV-2023 12:28:15        |
| Revision_Time     | = 20-FEB-2024 13:08:14       |
| Comment           | = single pulse decoupled ga  |
| Data_Format       | = 1D COMPLEX                 |
| Dim_Size          | = 26214                      |
| X_Domain          | = Carbon                     |
| Dim_Title         | = Carbon13                   |
| Dim_Units         | = [ppm]                      |
| Dimensions        | = X                          |
| Site              | = JNM-ECA500                 |
| Spectrometer      | = DELTA2_NMR                 |
| Field_Strength    | = 11.7473579 [T] (500 [MHz]) |
| X_Acq_Duration    | = 0.83361792 [s]             |
| X_Domain          | = 13C                        |
| X_Freq            | = 125.76529768 [MHz]         |
| X_Offset          | = 100 [ppm]                  |
| X_Points          | = 32768                      |
| X_Prescans        | = 3                          |
| X_Resolution      | = 1.19959034 [Hz]            |
| X_Sweep           | = 39.3081761 [kHz]           |
| X_Sweep_Clipped   | = 31.44654088 [kHz]          |
| Irr_Domain        | = Proton                     |
| Irr_Freq          | = 500.15991521 [MHz]         |
| Irr_Offset        | = 5.0 [ppm]                  |
| Clipped           | = FALSE                      |
| Scans             | = 1024                       |
| Total_Scans       | = 1024                       |
| Relaxation_Delay  | = 2 [s]                      |
| Recv_Gain         | = 50                         |
| Temp_Set          | = 21.2 [dC]                  |
| X_90_Width        | = 12.65 [us]                 |
| X_Acq_Time        | = 0.83361792 [s]             |
| X_Angle           | = 90 [deg]                   |
| X_Atn             | = 7 [dB]                     |
| X_Pulse           | = 4.2166667 [us]             |
| Irr_Atn_Dec       | = 25.254 [dB]                |
| Irr_Atn_Noise     | = 25.254 [dB]                |
| Irr_Noise         | = WALTZ                      |
| Irr_Pwidth        | = 92 [us]                    |
| Decoupling        | = TRUE                       |
| Initial_Wait      | = 1 [s]                      |
| Noe               | = TRUE                       |
| Noe_Time          | = 2 [s]                      |
| Repetition_Time   | = 2.83361792 [s]             |

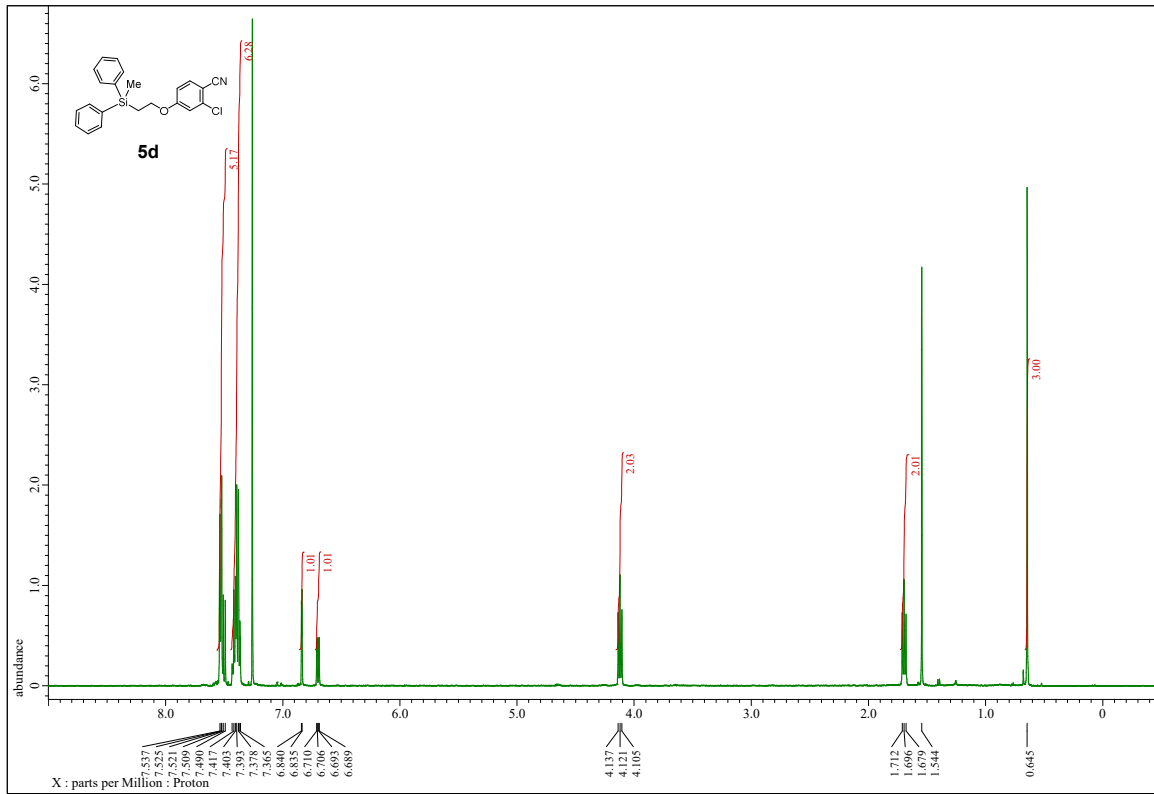

**JEOL**

|                   |                             |
|-------------------|-----------------------------|
| Filename          | = NAN40_240219_Proton-1-3.j |
| Author            | = delta                     |
| Experiment        | = proton.jxp                |
| Sample_id         | = NAN40_240219              |
| Solvent           | = CHLOROFORM-D              |
| Actual_Start_Time | = 19-FEB-2024 20:53:23      |
| Revision_Time     | = 20-FEB-2024 13:10:56      |
| Comment           | = single pulse              |
| Data_Format       | = 1D COMPLEX                |
| Dim_Size          | = 13107                     |
| X_Domain          | = Proton                    |
| Dim_Title         | = Proton                    |
| Dim_Units         | = [ppm]                     |
| Dimensions        | = X                         |
| Site              | = JNM-ECA500                |
| Spectrometer      | = DELTA2_NMR                |
| Field_Strength    | = 11.7473579[T] (500[MHz])  |
| X_Acq_Duration    | = 1.74587904[s]             |
| X_Domain          | = 1H                        |
| X_Freq            | = 500.15991521[MHz]         |
| X_Offset          | = 5.0[ppm]                  |
| X_Points          | = 16284                     |
| X_Prescans        | = 1                         |
| X_Resolution      | = 0.57277737[Hz]            |
| X_Sweep           | = 9.3848438[kHz]            |
| X_Sweep_Clipped   | = 7.50750751[kHz]           |
| Irr_Domain        | = Proton                    |
| Irr_Freq          | = 500.15991521[MHz]         |
| Irr_Offset        | = 5.0[ppm]                  |
| Tri_Domain        | = Proton                    |
| Tri_Freq          | = 500.15991521[MHz]         |
| Tri_Offset        | = 5.0[ppm]                  |
| Clipped           | = FALSE                     |
| Scans             | = 32                        |
| Total_Scans       | = 32                        |
| Relaxation_Delay  | = 5[s]                      |
| Recv_gain         | = 60                        |
| Temp_Set          | = 20.5[dC]                  |
| X_90_Width        | = 6.7[us]                   |
| X_Acq_Time        | = 1.74587904[s]             |
| X_Angle           | = 45[deg]                   |
| X_Atn             | = 2.5[dB]                   |
| X_Pulse           | = 3.35[us]                  |
| Irr_Mode          | = Off                       |
| Tri_Mode          | = Off                       |
| Duets_Preset      | = FALSE                     |
| Initial_Wait      | = 1[s]                      |
| Repetition_Time   | = 6.74587904[s]             |

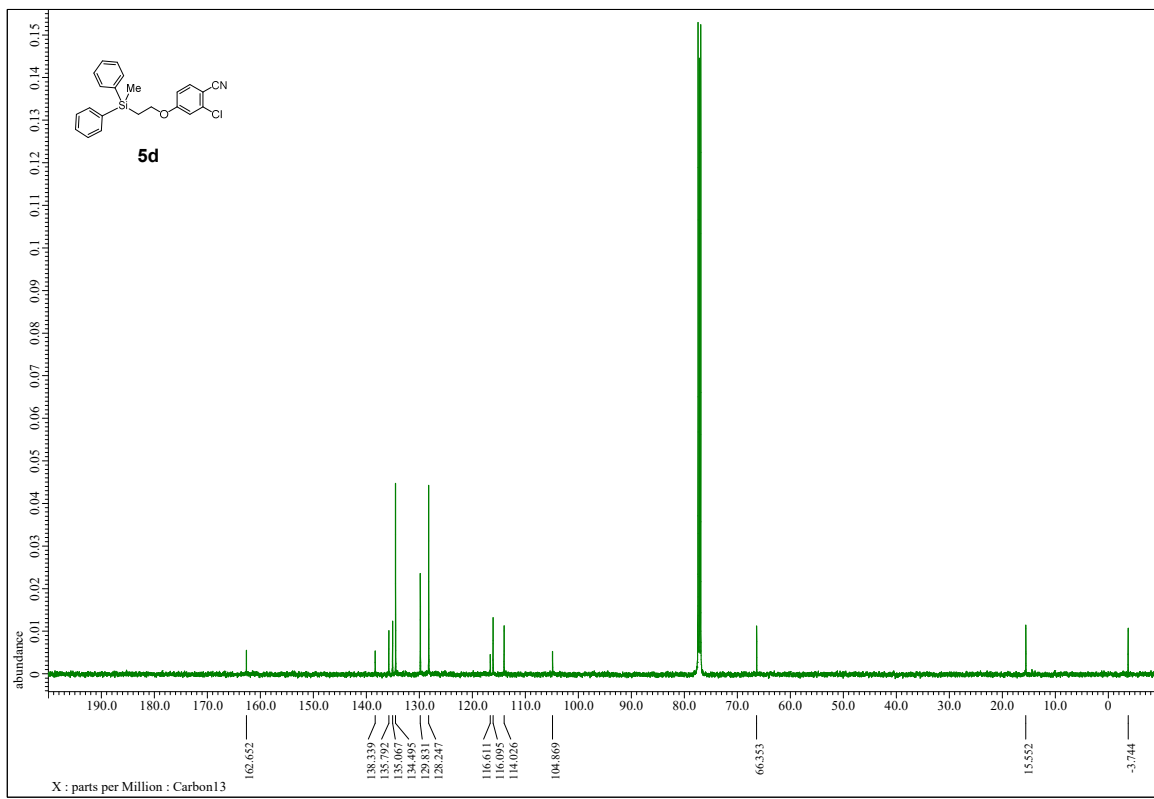

**JEOL**

|                   |                             |
|-------------------|-----------------------------|
| Filename          | = NAN40_Carbon-1-3.jdf      |
| Author            | = delta                     |
| Experiment        | = carbon.jxp                |
| Sample_id         | = NAN40                     |
| Solvent           | = CHLOROFORM-D              |
| Actual_Start_Time | = 20-NOV-2023 19:35:22      |
| Revision_Time     | = 20-FEB-2024 13:12:43      |
| Comment           | = single pulse decoupled ga |
| Data_Format       | = 1D COMPLEX                |
| Dim_Size          | = 26214                     |
| X_Domain          | = Carbon                    |
| Dim_Title         | = Carbon13                  |
| Dim_Units         | = [ppm]                     |
| Dimensions        | = X                         |
| Site              | = JNM-ECA500                |
| Spectrometer      | = DELTA2_NMR                |
| Field_Strength    | = 11.7473579[T] (500[MHz])  |
| X_Acq_Duration    | = 0.83361792[s]             |
| X_Domain          | = 13C                       |
| X_Freq            | = 125.76529768[MHz]         |
| X_Offset          | = 100[ppm]                  |
| X_Points          | = 32768                     |
| X_Prescans        | = 4                         |
| X_Resolution      | = 1.19959034[Hz]            |
| X_Sweep           | = 39.3081761[kHz]           |
| X_Sweep_Clipped   | = 31.44654088[kHz]          |
| Irr_Domain        | = Proton                    |
| Irr_Freq          | = 500.15991521[MHz]         |
| Irr_Offset        | = 5.0[ppm]                  |
| Clipped           | = FALSE                     |
| Scans             | = 2048                      |
| Total_Scans       | = 2048                      |
| Relaxation_Delay  | = 2[s]                      |
| Recv_gain         | = 50                        |
| Temp_Set          | = 22.9[dC]                  |
| X_90_Width        | = 12.65[us]                 |
| X_Acq_Time        | = 0.83361792[s]             |
| X_Angle           | = 90[deg]                   |
| X_Atn             | = 7[db]                     |
| X_Pulse           | = 4.2166667[us]             |
| Irr_Atn_Dec       | = 25.254[db]                |
| Irr_Atn_No        | = 25.254[db]                |
| Irr_Noise         | = WALTZ                     |
| Irr_Pwidth        | = 92[us]                    |
| Decoupling        | = TRUE                      |
| Initial_Wait      | = 1[s]                      |
| Noe               | = TRUE                      |
| Noe_Time          | = 2[s]                      |
| Repetition_Time   | = 2.83361792[s]             |

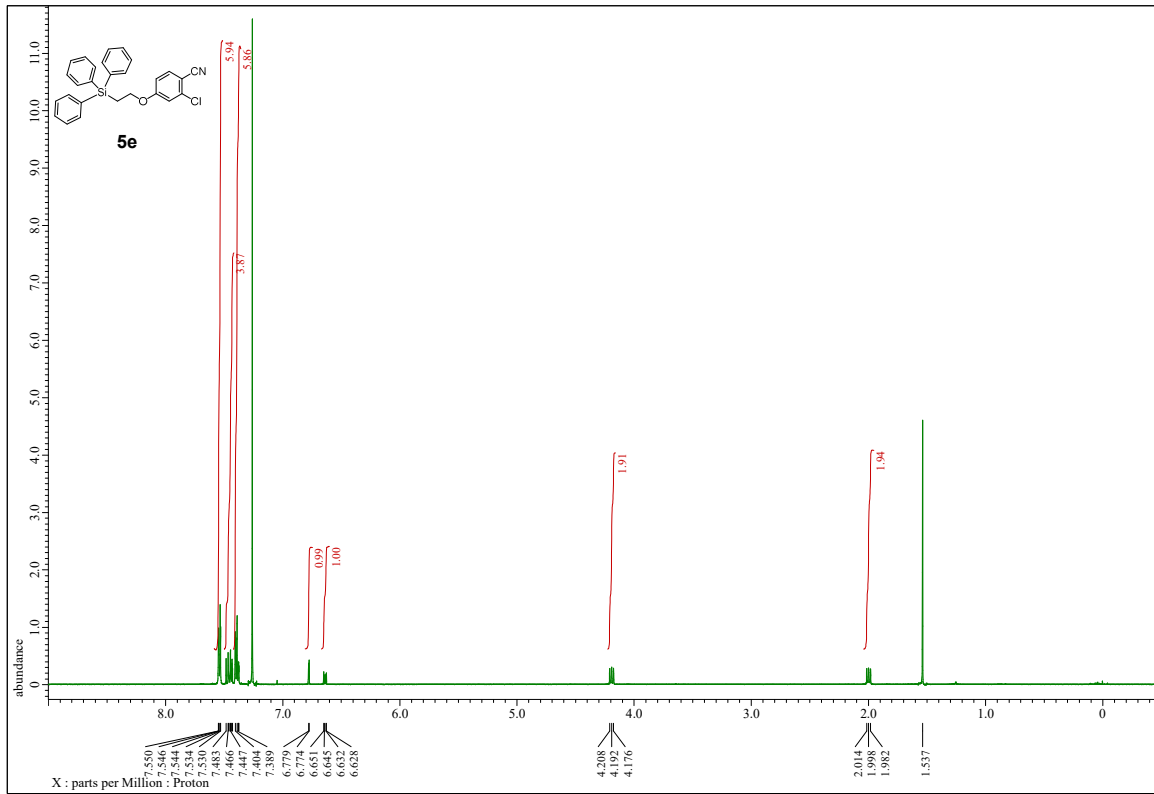

**JEOL**

|                   |                             |
|-------------------|-----------------------------|
| Filename          | = 270-051-5_GPC161-169_Proc |
| Author            | = delta                     |
| Experiment        | = proton.jkp                |
| Sample_id         | = 270-051-5_GPC161-169      |
| Solvent           | = CHLOROFORM-D              |
| Actual_Start_Time | = 9-NOV-2023 17:32:31       |
| Revision_Time     | = 20-FEB-2024 13:14:19      |
| Comment           | = single pulse              |
| Data_Format       | = 1D COMPLEX                |
| Dim_Size          | = 13107                     |
| X_Domain          | = Proton                    |
| Dim_Title         | = Proton                    |
| Dim_Units         | = [ppm]                     |
| Dimensions        | = X                         |
| Site              | = JNM-ECA500                |
| Spectrometer      | = DELTA2_NMR                |
| Field_Strength    | = 11.7473579 [T] (500[MHz]) |
| X_Acq_Duration    | = 1.74587904 [s]            |
| X_Domain          | = 18                        |
| X_Freq            | = 500.15991521 [MHz]        |
| X_Offset          | = 5.0 [ppm]                 |
| X_Points          | = 16284                     |
| X_Prescans        | = 1                         |
| X_Resolution      | = 0.5727737 [Hz]            |
| X_Sweep           | = 9.38438438 [kHz]          |
| X_Sweep_Clipped   | = 7.50750751 [kHz]          |
| Irr_Domain        | = Proton                    |
| Irr_Freq          | = 500.15991521 [MHz]        |
| Irr_Offset        | = 5.0 [ppm]                 |
| Tri_Domain        | = Proton                    |
| Tri_Freq          | = 500.15991521 [MHz]        |
| Tri_Offset        | = 5.0 [ppm]                 |
| Clipped           | = FALSE                     |
| Scans             | = 16                        |
| Total_Scans       | = 16                        |
| Relaxation_Delay  | = 5 [s]                     |
| Recvc_gain        | = 60                        |
| Temp_Set          | = 21.9 [dC]                 |
| X_90_Width        | = 6.7 [us]                  |
| X_Acq_Time        | = 1.74587904 [s]            |
| X_Angle           | = 45 [deg]                  |
| X_Atn             | = 2.5 [dB]                  |
| X_Pulse           | = 3.35 [us]                 |
| Irr_Mode          | = Off                       |
| Tri_Mode          | = Off                       |
| Datba_Preset      | = FALSE                     |
| Initial_Wait      | = 1 [s]                     |
| Repetition_Time   | = 6.74587904 [s]            |

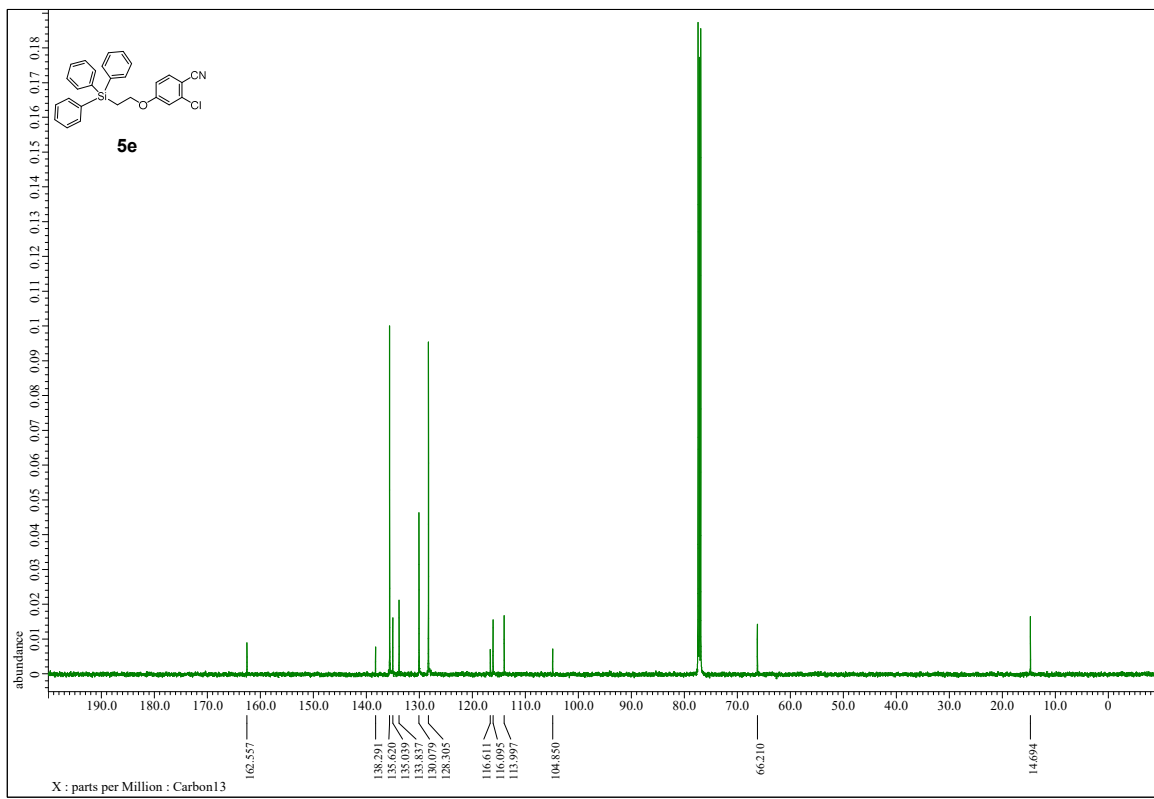

**JEOL**

|                   |                             |
|-------------------|-----------------------------|
| Filename          | = NAN042_Carbon-1-2.jdf     |
| Author            | = delta                     |
| Experiment        | = carbon.jkp                |
| Sample_id         | = 270-051-5_GPC_retake      |
| Solvent           | = CHLOROFORM-D              |
| Actual_Start_Time | = 10-NOV-2023 22:51:24      |
| Revision_Time     | = 20-FEB-2024 13:16:15      |
| Comment           | = single pulse decoupled ga |
| Data_Format       | = 1D COMPLEX                |
| Dim_Size          | = 26214                     |
| X_Domain          | = Carbon                    |
| Dim_Title         | = Carbon13                  |
| Dim_Units         | = [ppm]                     |
| Dimensions        | = X                         |
| Site              | = JNM-ECA500                |
| Spectrometer      | = DELTA2_NMR                |
| Field_Strength    | = 11.7473579 [T] (500[MHz]) |
| X_Acq_Duration    | = 0.83361792 [s]            |
| X_Domain          | = 13C                       |
| X_Freq            | = 125.76529768 [MHz]        |
| X_Offset          | = 100 [ppm]                 |
| X_Points          | = 32768                     |
| X_Prescans        | = 4                         |
| X_Resolution      | = 1.19959034 [Hz]           |
| X_Sweep           | = 39.3081761 [kHz]          |
| X_Sweep_Clipped   | = 31.44654088 [kHz]         |
| Irr_Domain        | = Proton                    |
| Irr_Freq          | = 500.15991521 [MHz]        |
| Irr_Offset        | = 5.0 [ppm]                 |
| Clipped           | = FALSE                     |
| Scans             | = 2048                      |
| Total_Scans       | = 2048                      |
| Relaxation_Delay  | = 2 [s]                     |
| Recvc_gain        | = 50                        |
| Temp_Set          | = 21.9 [dC]                 |
| X_90_Width        | = 12.65 [us]                |
| X_Acq_Time        | = 0.83361792 [s]            |
| X_Angle           | = 90 [deg]                  |
| X_Atn             | = 7 [dB]                    |
| X_Pulse           | = 4.2166667 [us]            |
| Irr_Atn_Dec       | = 25.254 [dB]               |
| Irr_Atn_Noise     | = 25.254 [dB]               |
| Irr_Noise         | = WALTZ                     |
| Irr_Pwidth        | = 92 [us]                   |
| Decoupling        | = TRUE                      |
| Initial_Wait      | = 1 [s]                     |
| Noe               | = TRUE                      |
| Noe_Time          | = 2 [s]                     |
| Repetition_Time   | = 2.83361792 [s]            |
